# Supplementary material for: Hypomethylating agents synergize with irinotecan to improve response to chemotherapy in colorectal cancer cells
Source: PLoS One. 2017 Apr 26;12(4):e0176139. doi: 10.1371/journal.pone.0176139 (PMC5405959; doi:10.1371/journal.pone.0176139)
Supplement: S2 Table — Derived as described in Methods and Materials. All values are log2 transformed. (XLSX) [file pone.0176139.s005.xlsx]

## Sheet: sensitization_genes_expression_
S2 Table
GENEID	SYSTEMATICNAME	DESCRIPTION	AZA-MOCK	AZAIRI-MOCK	IRI-MOCK
ROCK1	NM_005406	ref|Homo sapiens Rho-associated, coiled-coil containing protein kinase 1 (ROCK1), mRNA [NM_005406]	-0.0503878	-0.255002	-0.44523
TEX14	NM_198393	ref|Homo sapiens testis expressed 14 (TEX14), transcript variant 1, mRNA [NM_198393]	0.364098	0.588966	1.45118
NF1	NM_000267	ref|Homo sapiens neurofibromin 1 (NF1), transcript variant 2, mRNA [NM_000267]	-0.307877	-0.613287	-0.944308
XR_019420	XR_019420	gb|PREDICTED: Homo sapiens similar to C-terminal-binding protein 2 (LOC646936), miscRNA [XR_019420]	-0.0609261	-0.650778	-0.589833
NRP2	NM_201266	ref|Homo sapiens neuropilin 2 (NRP2), transcript variant 1, mRNA [NM_201266]	0.288703	-0.146338	0.139879
CDK11B	NM_033489	ref|Homo sapiens cyclin-dependent kinase 11B (CDK11B), transcript variant 5, mRNA [NM_033489]	-0.0419917	0.149881	0.163041
LOC388630	NM_001194986	ref|Homo sapiens UPF0632 protein A (LOC388630), mRNA [NM_001194986]	0.0662534	-0.602698	-0.764966
IFFO1	NM_001039670	ref|Homo sapiens intermediate filament family orphan 1 (IFFO1), transcript variant 4, mRNA [NM_001039670]	1.13142	0.947478	2.14159
MANBAL	NM_022077	ref|Homo sapiens mannosidase, beta A, lysosomal-like (MANBAL), transcript variant 1, mRNA [NM_022077]	-0.0761707	-0.296688	-0.380145
SNAI1	NM_005985	ref|Homo sapiens snail homolog 1 (Drosophila) (SNAI1), mRNA [NM_005985]	0.8805	0.505625	1.43937
ROR1	NM_005012	ref|Homo sapiens receptor tyrosine kinase-like orphan receptor 1 (ROR1), transcript variant 1, mRNA [NM_005012]	-0.121147	-0.944312	-1.3981
ENST00000340449	ENST00000340449	ens|dedicator of cytokinesis 9 [Source:HGNC Symbol;Acc:14132] [ENST00000340449]	-0.266153	-0.218012	-0.592528
SRSF11	NM_004768	ref|Homo sapiens serine/arginine-rich splicing factor 11 (SRSF11), transcript variant 1, mRNA [NM_004768]	0.26761	0.214608	0.482477
CTR9	NM_014633	ref|Homo sapiens Ctr9, Paf1/RNA polymerase II complex component, homolog (S. cerevisiae) (CTR9), mRNA [NM_014633]	-0.00229729	0.510003	0.621117
POLD2	NM_006230	ref|Homo sapiens polymerase (DNA directed), delta 2, regulatory subunit 50kDa (POLD2), transcript variant 2, mRNA [NM_006230]	-0.272605	-0.578979	-0.697109
CHMP5	NM_016410	ref|Homo sapiens chromatin modifying protein 5 (CHMP5), transcript variant 1, mRNA [NM_016410]	0.190042	0.530906	1.11445
MTHFD1	NM_005956	ref|Homo sapiens methylenetetrahydrofolate dehydrogenase (NADP+ dependent) 1, methenyltetrahydrofolate cyclohydrolase, formyltetrahydrofolate synthetase (MTHFD1), mRNA [NM_005956]	-0.245392	-0.313521	-1.01053
RNGTT	NM_003800	ref|Homo sapiens RNA guanylyltransferase and 5'-phosphatase (RNGTT), mRNA [NM_003800]	0.153385	-0.437614	-0.767191
BCL2L12	NM_138639	ref|Homo sapiens BCL2-like 12 (proline rich) (BCL2L12), transcript variant 1, mRNA [NM_138639]	0.184646	0.556405	0.636634
CCDC88B	NM_032251	ref|Homo sapiens coiled-coil domain containing 88B (CCDC88B), mRNA [NM_032251]	1.1377	1.10067	1.4308
SMCR7	NM_139162	ref|Homo sapiens Smith-Magenis syndrome chromosome region, candidate 7 (SMCR7), transcript variant 1, mRNA [NM_139162]	0.30553	0.891213	0.954677
CLK3	NM_003992	ref|Homo sapiens CDC-like kinase 3 (CLK3), transcript variant 2, mRNA [NM_003992]	0.135434	0.318002	0.60974
C3orf75	NM_001031703	ref|Homo sapiens chromosome 3 open reading frame 75 (C3orf75), mRNA [NM_001031703]	-0.52572	-0.438461	-0.719666
LPIN2	NM_014646	ref|Homo sapiens lipin 2 (LPIN2), mRNA [NM_014646]	0.310489	0.687734	0.823624
SYNE2	NM_182914	ref|Homo sapiens spectrin repeat containing, nuclear envelope 2 (SYNE2), transcript variant 5, mRNA [NM_182914]	-0.490617	0.0254875	-0.459184
SLC20A2	NM_006749	ref|Homo sapiens solute carrier family 20 (phosphate transporter), member 2 (SLC20A2), mRNA [NM_006749]	0.116538	-0.550555	-0.799289
TNIK	NM_015028	ref|Homo sapiens TRAF2 and NCK interacting kinase (TNIK), transcript variant 1, mRNA [NM_015028]	-0.0646036	-0.61566	-1.04998
LOC439911	AK127450	gb|Homo sapiens cDNA FLJ45542 fis, clone BRTHA2033320. [AK127450]	0.331245	1.14887	1.258
GPR176	NM_007223	ref|Homo sapiens G protein-coupled receptor 176 (GPR176), mRNA [NM_007223]	-0.415915	-0.420569	-0.406569
STK24	NM_001032296	ref|Homo sapiens serine/threonine kinase 24 (STK24), transcript variant 2, mRNA [NM_001032296]	-0.134872	-0.530468	-0.876851
IL20	NM_018724	ref|Homo sapiens interleukin 20 (IL20), mRNA [NM_018724]	-0.484473	0.0654765	-0.705012
WDR7	NM_015285	ref|Homo sapiens WD repeat domain 7 (WDR7), transcript variant 1, mRNA [NM_015285]	0.0968341	-0.452741	-0.651951
EP400	NM_015409	ref|Homo sapiens E1A binding protein p400 (EP400), mRNA [NM_015409]	-0.0256436	-0.00120624	-0.722908
CCDC99	NM_017785	ref|Homo sapiens coiled-coil domain containing 99 (CCDC99), mRNA [NM_017785]	0.173652	0.372748	0.679769
FDXR	NM_004110	ref|Homo sapiens ferredoxin reductase (FDXR), nuclear gene encoding mitochondrial protein, transcript variant 2, mRNA [NM_004110]	-0.0928567	0.429316	0.714095
MSH3	NM_002439	ref|Homo sapiens mutS homolog 3 (E. coli) (MSH3), mRNA [NM_002439]	-0.154832	-0.49819	-0.58949
WTAP	NM_152858	ref|Homo sapiens Wilms tumor 1 associated protein (WTAP), transcript variant 3, mRNA [NM_152858]	0.142184	0.04073	0.509142
PNRC2	NM_017761	ref|Homo sapiens proline-rich nuclear receptor coactivator 2 (PNRC2), mRNA [NM_017761]	0.184875	0.279796	0.385585
ARHGEF7	NM_145735	ref|Homo sapiens Rho guanine nucleotide exchange factor (GEF) 7 (ARHGEF7), transcript variant 2, mRNA [NM_145735]	0.184858	-0.355968	0.0926735
A_24_P135391	A_24_P135391	Unknown	-0.202077	-0.451814	-0.658069
HSP90AA1	NM_005348	ref|Homo sapiens heat shock protein 90kDa alpha (cytosolic), class A member 1 (HSP90AA1), transcript variant 2, mRNA [NM_005348]	0.0204766	-0.452827	-0.570928
TBL1X	NM_005647	ref|Homo sapiens transducin (beta)-like 1X-linked (TBL1X), transcript variant 1, mRNA [NM_005647]	-0.385077	-1.12308	-1.27887
CIDEC	NM_022094	ref|Homo sapiens cell death-inducing DFFA-like effector c (CIDEC), transcript variant 3, mRNA [NM_022094]	0.386623	0.459185	0.939001
HERC2	NM_004667	ref|Homo sapiens hect domain and RLD 2 (HERC2), mRNA [NM_004667]	-0.232673	-0.612219	-0.903401
UPF2	NM_080599	ref|Homo sapiens UPF2 regulator of nonsense transcripts homolog (yeast) (UPF2), transcript variant 1, mRNA [NM_080599]	-0.0891534	0.117598	0.0634141
TRAF4	NM_004295	ref|Homo sapiens TNF receptor-associated factor 4 (TRAF4), mRNA [NM_004295]	-0.0773439	-0.136387	0.0232098
MDN1	NM_014611	ref|Homo sapiens MDN1, midasin homolog (yeast) (MDN1), mRNA [NM_014611]	-0.141986	-0.308093	-0.493024
HSD17B12	NM_016142	ref|Homo sapiens hydroxysteroid (17-beta) dehydrogenase 12 (HSD17B12), mRNA [NM_016142]	-0.0893815	-0.220276	-0.973773
ZG16B	NM_145252	ref|Homo sapiens zymogen granule protein 16 homolog B (rat) (ZG16B), mRNA [NM_145252]	1.03176	-0.0122378	1.34027
IRF9	NM_006084	ref|Homo sapiens interferon regulatory factor 9 (IRF9), mRNA [NM_006084]	0.301845	1.08698	1.10091
FHL2	NM_001039492	ref|Homo sapiens four and a half LIM domains 2 (FHL2), transcript variant 5, mRNA [NM_001039492]	0.163985	-0.583127	-0.740976
ATL3	NM_015459	ref|Homo sapiens atlastin GTPase 3 (ATL3), mRNA [NM_015459]	0.245857	0.0300217	0.562407
RNF181	NM_016494	ref|Homo sapiens ring finger protein 181 (RNF181), mRNA [NM_016494]	0.145039	0.238495	0.542562
C2orf56	NM_144736	ref|Homo sapiens chromosome 2 open reading frame 56 (C2orf56), nuclear gene encoding mitochondrial protein, transcript variant 1, mRNA [NM_144736]	0.0976322	0.193635	0.580136
GLI4	NM_138465	ref|Homo sapiens GLI family zinc finger 4 (GLI4), mRNA [NM_138465]	0.0794906	0.434436	0.70546
CHIC2	NM_012110	ref|Homo sapiens cysteine-rich hydrophobic domain 2 (CHIC2), mRNA [NM_012110]	0.263723	0.317409	0.494147
THADA	NM_022065	ref|Homo sapiens thyroid adenoma associated (THADA), transcript variant 1, mRNA [NM_022065]	-0.309856	-0.457981	-0.999597
PTPN11	NM_002834	ref|Homo sapiens protein tyrosine phosphatase, non-receptor type 11 (PTPN11), mRNA [NM_002834]	0.1834	0.114974	0.0954077
AARSD1	NM_025267	ref|Homo sapiens alanyl-tRNA synthetase domain containing 1 (AARSD1), transcript variant 2, mRNA [NM_025267]	-0.193254	-0.278141	-0.618844
ITPKC	NM_025194	ref|Homo sapiens inositol 1,4,5-trisphosphate 3-kinase C (ITPKC), mRNA [NM_025194]	0.0891603	0.277324	0.658914
RBM4B	NM_031492	ref|Homo sapiens RNA binding motif protein 4B (RBM4B), mRNA [NM_031492]	0.0927141	0.351778	0.583702
ENST00000370635	ENST00000370635	ens|MORN repeat containing 4 [Source:HGNC Symbol;Acc:24001] [ENST00000370635]	0.226014	0.939937	1.2352
TMEM85	NM_016454	ref|Homo sapiens transmembrane protein 85 (TMEM85), mRNA [NM_016454]	0.0301077	0.0978832	0.255575
NCOA6	NM_014071	ref|Homo sapiens nuclear receptor coactivator 6 (NCOA6), mRNA [NM_014071]	-0.211075	-0.0911436	-0.483349
CCDC99	NM_017785	ref|Homo sapiens coiled-coil domain containing 99 (CCDC99), mRNA [NM_017785]	0.220102	0.359601	0.669713
NAT1	NM_000662	ref|Homo sapiens N-acetyltransferase 1 (arylamine N-acetyltransferase) (NAT1), transcript variant 5, mRNA [NM_000662]	0.148863	0.685576	0.969816
FRG2	NM_001005217	ref|Homo sapiens FSHD region gene 2 (FRG2), mRNA [NM_001005217]	-0.065182	0.478051	1.20094
NRIP1	NM_003489	ref|Homo sapiens nuclear receptor interacting protein 1 (NRIP1), mRNA [NM_003489]	0.119587	0.311075	0.414612
GINS2	NM_016095	ref|Homo sapiens GINS complex subunit 2 (Psf2 homolog) (GINS2), mRNA [NM_016095]	-0.167424	-0.39981	-0.592899
OXT	NM_000915	ref|Homo sapiens oxytocin, prepropeptide (OXT), mRNA [NM_000915]	0.29898	0.0902893	0.5278
HSP90AA1	NM_005348	ref|Homo sapiens heat shock protein 90kDa alpha (cytosolic), class A member 1 (HSP90AA1), transcript variant 2, mRNA [NM_005348]	-0.0509728	-0.468836	-0.60858
RXRA	NM_002957	ref|Homo sapiens retinoid X receptor, alpha (RXRA), mRNA [NM_002957]	-0.393198	-0.631408	-0.965304
TDRD7	NM_014290	ref|Homo sapiens tudor domain containing 7 (TDRD7), mRNA [NM_014290]	0.291424	0.620819	0.976723
NCAM1	NM_181351	ref|Homo sapiens neural cell adhesion molecule 1 (NCAM1), transcript variant 2, mRNA [NM_181351]	-1.11855	-0.375491	-0.798819
RABGAP1	NM_012197	ref|Homo sapiens RAB GTPase activating protein 1 (RABGAP1), mRNA [NM_012197]	-0.11871	-0.319683	-0.631148
ENST00000380734	ENST00000380734	gb|H.sapiens mRNA (fetal brain cDNA c2_11). [Z70701]	-0.308637	-0.0322327	-0.352458
NECAP1	NM_015509	ref|Homo sapiens NECAP endocytosis associated 1 (NECAP1), transcript variant 1, mRNA [NM_015509]	0.12564	0.459539	0.451009
PNPLA3	NM_025225	ref|Homo sapiens patatin-like phospholipase domain containing 3 (PNPLA3), mRNA [NM_025225]	0.300353	0.83243	0.998107
ZNF701	NM_001172655	ref|Homo sapiens zinc finger protein 701 (ZNF701), transcript variant 1, mRNA [NM_001172655]	0.116868	0.259902	0.771998
SPTBN1	NM_003128	ref|Homo sapiens spectrin, beta, non-erythrocytic 1 (SPTBN1), transcript variant 1, mRNA [NM_003128]	-0.378136	-0.562454	-0.65281
LSS	NM_002340	ref|Homo sapiens lanosterol synthase (2,3-oxidosqualene-lanosterol cyclase) (LSS), transcript variant 1, mRNA [NM_002340]	-0.262411	0.0302431	-0.155845
GALNT2	NM_004481	ref|Homo sapiens UDP-N-acetyl-alpha-D-galactosamine:polypeptide N-acetylgalactosaminyltransferase 2 (GalNAc-T2) (GALNT2), mRNA [NM_004481]	-0.410622	-0.371086	-0.821926
SPTBN1	NM_178313	ref|Homo sapiens spectrin, beta, non-erythrocytic 1 (SPTBN1), transcript variant 2, mRNA [NM_178313]	-0.0164297	-0.633439	-0.30861
EEF1A1	NM_001402	ref|Homo sapiens eukaryotic translation elongation factor 1 alpha 1 (EEF1A1), mRNA [NM_001402]	-0.117226	-0.124455	-0.33827
C10orf11	NM_032024	ref|Homo sapiens chromosome 10 open reading frame 11 (C10orf11), mRNA [NM_032024]	-0.559413	-1.24617	-1.41628
MLF2	NM_005439	ref|Homo sapiens myeloid leukemia factor 2 (MLF2), transcript variant 1, mRNA [NM_005439]	-0.177353	-0.3557	-0.612426
ENST00000335589	ENST00000335589	ens|fucosyltransferase 10 (alpha (1,3) fucosyltransferase) [Source:HGNC Symbol;Acc:19234] [ENST00000335589]	-0.340551	-0.377246	-0.776779
SRSF11	NM_004768	ref|Homo sapiens serine/arginine-rich splicing factor 11 (SRSF11), transcript variant 1, mRNA [NM_004768]	0.243411	0.193958	0.487114
FEM1B	NM_015322	ref|Homo sapiens fem-1 homolog b (C. elegans) (FEM1B), mRNA [NM_015322]	0.368698	-0.103546	0.440853
ENST00000522418	ENST00000522418	ref|PREDICTED: Homo sapiens hypothetical LOC100133311, transcript variant 1 (LOC100133311), partial miscRNA [XR_110658]	0.622661	0.523935	1.5927
APH1A	NM_016022	ref|Homo sapiens anterior pharynx defective 1 homolog A (C. elegans) (APH1A), transcript variant 2, mRNA [NM_016022]	-0.765449	-0.472206	-1.24103
LOC399815	NR_027282	ref|Homo sapiens chromosome 10 open reading frame 88 pseudogene (LOC399815), non-coding RNA [NR_027282]	0.318941	0.492559	0.82783
DYRK1A	NM_130438	ref|Homo sapiens dual-specificity tyrosine-(Y)-phosphorylation regulated kinase 1A (DYRK1A), transcript variant 5, mRNA [NM_130438]	-0.0112874	-0.424101	-0.518673
PTPN11	NM_002834	ref|Homo sapiens protein tyrosine phosphatase, non-receptor type 11 (PTPN11), mRNA [NM_002834]	0.204621	0.12944	0.120618
MSL1	NM_001012241	ref|Homo sapiens male-specific lethal 1 homolog (Drosophila) (MSL1), mRNA [NM_001012241]	0.0102078	0.275729	0.63904
CDCA3	NM_031299	ref|Homo sapiens cell division cycle associated 3 (CDCA3), mRNA [NM_031299]	0.0371876	-0.310801	-0.50781
CHIC2	NM_012110	ref|Homo sapiens cysteine-rich hydrophobic domain 2 (CHIC2), mRNA [NM_012110]	0.245375	0.245501	0.525211
LOC152225	NR_026934	ref|Homo sapiens hypothetical LOC152225 (LOC152225), non-coding RNA [NR_026934]	0.421847	0.924582	1.07331
PTPN2	NM_080423	ref|Homo sapiens protein tyrosine phosphatase, non-receptor type 2 (PTPN2), transcript variant 3, mRNA [NM_080423]	-0.185301	-0.392712	-0.586622
MTHFD1	NM_005956	ref|Homo sapiens methylenetetrahydrofolate dehydrogenase (NADP+ dependent) 1, methenyltetrahydrofolate cyclohydrolase, formyltetrahydrofolate synthetase (MTHFD1), mRNA [NM_005956]	-0.253368	-0.31527	-1.01423
UBE2D2	NM_181838	ref|Homo sapiens ubiquitin-conjugating enzyme E2D 2 (UBC4/5 homolog, yeast) (UBE2D2), transcript variant 2, mRNA [NM_181838]	0.059171	-0.389661	-0.695497
UTP18	NM_016001	ref|Homo sapiens UTP18, small subunit (SSU) processome component, homolog (yeast) (UTP18), mRNA [NM_016001]	0.0290331	-0.582005	-0.887585
METT5D1	NM_001113528	ref|Homo sapiens methyltransferase 5 domain containing 1 (METT5D1), transcript variant 1, mRNA [NM_001113528]	-0.0359838	-0.478254	-0.411082
PRC1	NM_003981	ref|Homo sapiens protein regulator of cytokinesis 1 (PRC1), transcript variant 1, mRNA [NM_003981]	-0.0546024	-0.367839	-0.418642
R3HDM1	NM_015361	ref|Homo sapiens R3H domain containing 1 (R3HDM1), mRNA [NM_015361]	-0.169173	-0.552428	-0.721266
MESP2	NM_001039958	ref|Homo sapiens mesoderm posterior 2 homolog (mouse) (MESP2), mRNA [NM_001039958]	0.526101	0.282315	0.501145
LOC441455	NR_026792	ref|Homo sapiens makorin ring finger protein 1 pseudogene (LOC441455), non-coding RNA [NR_026792]	0.0571612	0.179588	0.521098
RELT	NM_032871	ref|Homo sapiens RELT tumor necrosis factor receptor (RELT), transcript variant 1, mRNA [NM_032871]	0.164309	0.630665	0.844192
NUDCD3	NM_015332	ref|Homo sapiens NudC domain containing 3 (NUDCD3), mRNA [NM_015332]	-0.0633943	-0.598562	-0.636315
GUSBP1	NR_027027	ref|Homo sapiens glucuronidase, beta pseudogene 1 (GUSBP1), transcript variant 2, non-coding RNA [NR_027027]	0.237916	0.116064	0.6537
RPAP3	NM_024604	ref|Homo sapiens RNA polymerase II associated protein 3 (RPAP3), transcript variant 1, mRNA [NM_024604]	0.294625	0.370364	0.672325
CTPS2	NM_175859	ref|Homo sapiens CTP synthase II (CTPS2), transcript variant 2, mRNA [NM_175859]	-0.366867	-0.540065	-0.91854
ZNF230	NM_006300	ref|Homo sapiens zinc finger protein 230 (ZNF230), mRNA [NM_006300]	0.113268	0.560679	0.833458
DKFZP547L112	AL512723	gb|Homo sapiens mRNA; cDNA DKFZp547L112 (from clone DKFZp547L112). [AL512723]	-0.315111	-0.618174	-0.765178
PARP12	NM_022750	ref|Homo sapiens poly (ADP-ribose) polymerase family, member 12 (PARP12), mRNA [NM_022750]	0.456395	0.269071	0.336707
GIGYF2	NM_015575	ref|Homo sapiens GRB10 interacting GYF protein 2 (GIGYF2), transcript variant 2, mRNA [NM_015575]	-0.12466	-0.136512	-0.571462
GDA	NM_004293	ref|Homo sapiens guanine deaminase (GDA), mRNA [NM_004293]	1.7839	0.649761	2.03904
C10orf11	NM_032024	ref|Homo sapiens chromosome 10 open reading frame 11 (C10orf11), mRNA [NM_032024]	-0.488866	-1.4312	-1.43928
A_33_P3349676	A_33_P3349676	Unknown	-0.396963	-0.658833	-0.80148
SCARNA6	NR_003006	ref|Homo sapiens small Cajal body-specific RNA 6 (SCARNA6), guide RNA [NR_003006]	0.0968077	0.664788	0.616936
NAIP	NM_004536	ref|Homo sapiens NLR family, apoptosis inhibitory protein (NAIP), transcript variant 1, mRNA [NM_004536]	-0.486895	-0.379797	-0.574891
SETDB1	NR_026977	ref|Homo sapiens SET domain, bifurcated 1 (SETDB1), transcript variant 3, non-coding RNA [NR_026977]	0.413676	0.0379282	0.653271
RASAL2	NM_170692	ref|Homo sapiens RAS protein activator like 2 (RASAL2), transcript variant 2, mRNA [NM_170692]	-0.30053	-0.762764	-0.76756
A_33_P3419003	A_33_P3419003	Unknown	-0.120226	-0.314858	-0.466416
TYW1	NM_018264	ref|Homo sapiens tRNA-yW synthesizing protein 1 homolog (S. cerevisiae) (TYW1), mRNA [NM_018264]	-0.289299	0.0555672	-0.240116
LIG1	NM_000234	ref|Homo sapiens ligase I, DNA, ATP-dependent (LIG1), mRNA [NM_000234]	-0.506246	-0.435353	-0.877153
TBCEL	NM_152715	ref|Homo sapiens tubulin folding cofactor E-like (TBCEL), transcript variant 1, mRNA [NM_152715]	0.244426	0.390878	0.684243
BAZ1B	NM_032408	ref|Homo sapiens bromodomain adjacent to zinc finger domain, 1B (BAZ1B), mRNA [NM_032408]	-0.0662584	-0.160201	-0.534039
SNRPD1	NM_006938	ref|Homo sapiens small nuclear ribonucleoprotein D1 polypeptide 16kDa (SNRPD1), mRNA [NM_006938]	-0.0793277	-0.386319	-0.403939
POC5	NM_001099271	ref|Homo sapiens POC5 centriolar protein homolog (Chlamydomonas) (POC5), transcript variant 1, mRNA [NM_001099271]	0.158709	0.159287	0.528596
SMCR7L	NM_019008	ref|Homo sapiens Smith-Magenis syndrome chromosome region, candidate 7-like (SMCR7L), mRNA [NM_019008]	0.0697651	0.252997	0.498423
ARL14	NM_025047	ref|Homo sapiens ADP-ribosylation factor-like 14 (ARL14), mRNA [NM_025047]	0.923353	1.05434	2.35617
OR3A4	NR_024128	ref|Homo sapiens olfactory receptor, family 3, subfamily A, member 4 (OR3A4), non-coding RNA [NR_024128]	-0.0730119	-0.30391	0.0271011
INCENP	NM_001040694	ref|Homo sapiens inner centromere protein antigens 135/155kDa (INCENP), transcript variant 1, mRNA [NM_001040694]	0.178876	0.541122	0.782909
PTPN11	NM_002834	ref|Homo sapiens protein tyrosine phosphatase, non-receptor type 11 (PTPN11), mRNA [NM_002834]	0.204481	0.111619	0.0764248
RPS27L	NM_015920	ref|Homo sapiens ribosomal protein S27-like (RPS27L), mRNA [NM_015920]	0.0711847	0.672545	0.9786
RBAK	NM_021163	ref|Homo sapiens RB-associated KRAB zinc finger (RBAK), mRNA [NM_021163]	0.0687245	0.505001	0.595049
ATXN10	NM_013236	ref|Homo sapiens ataxin 10 (ATXN10), transcript variant 1, mRNA [NM_013236]	-0.0313338	-0.438169	-0.594164
GABARAPL1	NM_031412	ref|Homo sapiens GABA(A) receptor-associated protein like 1 (GABARAPL1), mRNA [NM_031412]	0.352831	0.506348	0.793128
PDGFA	NM_002607	ref|Homo sapiens platelet-derived growth factor alpha polypeptide (PDGFA), transcript variant 1, mRNA [NM_002607]	-0.0941216	-0.404454	-0.333384
PTPN11	NM_002834	ref|Homo sapiens protein tyrosine phosphatase, non-receptor type 11 (PTPN11), mRNA [NM_002834]	0.18427	0.10149	0.125807
SMCR7L	NM_019008	ref|Homo sapiens Smith-Magenis syndrome chromosome region, candidate 7-like (SMCR7L), mRNA [NM_019008]	-0.298219	-0.64178	-0.589116
ULBP3	NM_024518	ref|Homo sapiens UL16 binding protein 3 (ULBP3), mRNA [NM_024518]	0.322634	0.26975	0.689453
C1S	NM_201442	ref|Homo sapiens complement component 1, s subcomponent (C1S), transcript variant 1, mRNA [NM_201442]	0.509765	1.3955	1.3286
FHL2	NM_001039492	ref|Homo sapiens four and a half LIM domains 2 (FHL2), transcript variant 5, mRNA [NM_001039492]	0.163539	-0.578841	-0.730563
GINS2	NM_016095	ref|Homo sapiens GINS complex subunit 2 (Psf2 homolog) (GINS2), mRNA [NM_016095]	-0.197803	-0.445539	-0.625725
AKAP17A	NM_005088	ref|Homo sapiens A kinase (PRKA) anchor protein 17A (AKAP17A), transcript variant 1, mRNA [NM_005088]	0.142618	0.362942	0.795784
LOC645195	AK123450	gb|Homo sapiens cDNA FLJ41456 fis, clone BRSTN2012320. [AK123450]	0.346884	0.449332	0.642897
KDM4C	NM_015061	ref|Homo sapiens lysine (K)-specific demethylase 4C (KDM4C), transcript variant 1, mRNA [NM_015061]	-0.180785	-0.483767	-0.833376
SLC9A8	NM_015266	ref|Homo sapiens solute carrier family 9 (sodium/hydrogen exchanger), member 8 (SLC9A8), mRNA [NM_015266]	-0.304484	-0.377381	-0.466279
SMC6	NM_024624	ref|Homo sapiens structural maintenance of chromosomes 6 (SMC6), transcript variant 2, mRNA [NM_024624]	0.346043	0.266953	0.439031
GPNMB	NM_001005340	ref|Homo sapiens glycoprotein (transmembrane) nmb (GPNMB), transcript variant 1, mRNA [NM_001005340]	0.173161	0.881048	1.10507
TCF12	NM_207038	ref|Homo sapiens transcription factor 12 (TCF12), transcript variant 4, mRNA [NM_207038]	0.187941	-0.513111	-0.779796
UQCRH	NM_006004	ref|Homo sapiens ubiquinol-cytochrome c reductase hinge protein (UQCRH), nuclear gene encoding mitochondrial protein, mRNA [NM_006004]	0.115255	0.447378	0.574933
2016-03-07	NM_022826	ref|Homo sapiens membrane-associated ring finger (C3HC4) 7 (MARCH7), mRNA [NM_022826]	0.412952	0.0644037	0.591183
CD68	NM_001251	ref|Homo sapiens CD68 molecule (CD68), transcript variant 1, mRNA [NM_001251]	0.459993	0.979146	1.0979
B3GALNT2	NM_152490	ref|Homo sapiens beta-1,3-N-acetylgalactosaminyltransferase 2 (B3GALNT2), mRNA [NM_152490]	-0.0733223	0.197246	0.31771
ACACA	NM_198839	ref|Homo sapiens acetyl-CoA carboxylase alpha (ACACA), transcript variant 2, mRNA [NM_198839]	-0.057417	0.173748	0.182587
TMBIM4	NM_016056	ref|Homo sapiens transmembrane BAX inhibitor motif containing 4 (TMBIM4), mRNA [NM_016056]	-0.362181	-0.50253	-0.862697
MGAT1	NM_001114618	ref|Homo sapiens mannosyl (alpha-1,3-)-glycoprotein beta-1,2-N-acetylglucosaminyltransferase (MGAT1), transcript variant 1, mRNA [NM_001114618]	-0.103173	-0.33931	-0.163355
TFDP1	NM_007111	ref|Homo sapiens transcription factor Dp-1 (TFDP1), transcript variant 1, mRNA [NM_007111]	-0.0227143	-0.500371	-0.514547
CRTC2	NM_181715	ref|Homo sapiens CREB regulated transcription coactivator 2 (CRTC2), mRNA [NM_181715]	0.160865	0.450105	0.77541
NT5DC1	NM_152729	ref|Homo sapiens 5'-nucleotidase domain containing 1 (NT5DC1), mRNA [NM_152729]	-0.114549	-0.488388	-0.66774
ZNF48	NM_152652	ref|Homo sapiens zinc finger protein 48 (ZNF48), mRNA [NM_152652]	-0.416587	-0.225019	-0.484021
FAM91A1	NM_144963	ref|Homo sapiens family with sequence similarity 91, member A1 (FAM91A1), mRNA [NM_144963]	0.418095	0.0639904	0.56819
YIPF5	NM_030799	ref|Homo sapiens Yip1 domain family, member 5 (YIPF5), transcript variant 2, mRNA [NM_030799]	0.464253	0.310188	0.707331
MUC13	NM_033049	ref|Homo sapiens mucin 13, cell surface associated (MUC13), mRNA [NM_033049]	0.91362	1.43308	1.70406
ZNF595	NM_182524	ref|Homo sapiens zinc finger protein 595 (ZNF595), mRNA [NM_182524]	0.327994	0.449421	0.731851
PARL	NM_018622	ref|Homo sapiens presenilin associated, rhomboid-like (PARL), nuclear gene encoding mitochondrial protein, transcript variant 1, mRNA [NM_018622]	-0.162013	-0.397529	-0.490341
NOD2	NM_022162	ref|Homo sapiens nucleotide-binding oligomerization domain containing 2 (NOD2), mRNA [NM_022162]	0.290155	0.294706	0.859931
ATL3	NM_015459	ref|Homo sapiens atlastin GTPase 3 (ATL3), mRNA [NM_015459]	0.227749	0.00134895	0.532759
LOC100128788	NR_027274	ref|Homo sapiens hypothetical LOC100128788 (LOC100128788), transcript variant 1, non-coding RNA [NR_027274]	-0.0860055	0.328519	0.628468
TMEM85	NM_016454	ref|Homo sapiens transmembrane protein 85 (TMEM85), mRNA [NM_016454]	0.0500526	0.0727355	0.241853
RPAP3	NM_024604	ref|Homo sapiens RNA polymerase II associated protein 3 (RPAP3), transcript variant 1, mRNA [NM_024604]	0.352304	0.431237	0.62676
CYP3A5	NM_000777	ref|Homo sapiens cytochrome P450, family 3, subfamily A, polypeptide 5 (CYP3A5), transcript variant 1, mRNA [NM_000777]	0.744405	1.73056	2.60526
KATNA1	NM_007044	ref|Homo sapiens katanin p60 (ATPase-containing) subunit A 1 (KATNA1), mRNA [NM_007044]	0.128516	0.107934	0.507593
RPL36A	NM_021029	ref|Homo sapiens ribosomal protein L36a (RPL36A), transcript variant 1, mRNA [NM_021029]	0.266406	0.293545	0.402871
IGFL4	NM_001002923	ref|Homo sapiens IGF-like family member 4 (IGFL4), mRNA [NM_001002923]	0.427178	0.839154	0.976419
ENST00000203616	ENST00000203616	ens|RNA binding motif protein 41 [Source:HGNC Symbol;Acc:25617] [ENST00000203616]	0.268397	0.208077	0.35795
C14orf145	NM_152446	ref|Homo sapiens chromosome 14 open reading frame 145 (C14orf145), mRNA [NM_152446]	-0.0611206	-0.417489	-0.794031
ZNF707	NM_173831	ref|Homo sapiens zinc finger protein 707 (ZNF707), transcript variant 1, mRNA [NM_173831]	-0.00248098	0.303606	1.03878
ZFAT	NM_020863	ref|Homo sapiens zinc finger and AT hook domain containing (ZFAT), transcript variant 1, mRNA [NM_020863]	0.115436	-0.511223	-0.584336
B3GNT5	NM_032047	ref|Homo sapiens UDP-GlcNAc:betaGal beta-1,3-N-acetylglucosaminyltransferase 5 (B3GNT5), mRNA [NM_032047]	-0.037996	-0.424995	-0.412763
ZMYM4	NM_005095	ref|Homo sapiens zinc finger, MYM-type 4 (ZMYM4), mRNA [NM_005095]	0.0461402	-0.301411	-0.481765
COQ5	NM_032314	ref|Homo sapiens coenzyme Q5 homolog, methyltransferase (S. cerevisiae) (COQ5), nuclear gene encoding mitochondrial protein, mRNA [NM_032314]	-0.328804	-0.616384	-0.750408
A_33_P3412556	A_33_P3412556	Unknown	-0.0671901	-0.409982	-0.421649
FAM100A	NM_145253	ref|Homo sapiens family with sequence similarity 100, member A (FAM100A), mRNA [NM_145253]	0.0627944	0.41082	0.438973
NDRG4	NM_022910	ref|Homo sapiens NDRG family member 4 (NDRG4), transcript variant 3, mRNA [NM_022910]	0.623831	0.557658	0.877556
TBL1Y	NM_033284	ref|Homo sapiens transducin (beta)-like 1, Y-linked (TBL1Y), transcript variant 1, mRNA [NM_033284]	-0.457121	-1.25652	-1.23913
PRDX1	NM_002574	ref|Homo sapiens peroxiredoxin 1 (PRDX1), transcript variant 1, mRNA [NM_002574]	0.220807	0.437734	0.674036
C7orf44	NM_018224	ref|Homo sapiens chromosome 7 open reading frame 44 (C7orf44), mRNA [NM_018224]	-0.185055	-0.620098	-0.666661
TMBIM4	NM_016056	ref|Homo sapiens transmembrane BAX inhibitor motif containing 4 (TMBIM4), mRNA [NM_016056]	-0.0207366	-0.422619	-0.395601
DHRSX	NM_145177	ref|Homo sapiens dehydrogenase/reductase (SDR family) X-linked (DHRSX), mRNA [NM_145177]	-0.562587	-0.908477	-0.770946
RBL1	NM_002895	ref|Homo sapiens retinoblastoma-like 1 (p107) (RBL1), transcript variant 1, mRNA [NM_002895]	0.126103	-0.402341	-0.742103
ATRX	NM_000489	ref|Homo sapiens alpha thalassemia/mental retardation syndrome X-linked (ATRX), transcript variant 1, mRNA [NM_000489]	-0.0128456	-0.142427	-0.630129
EIF4A2	NM_001967	ref|Homo sapiens eukaryotic translation initiation factor 4A2 (EIF4A2), mRNA [NM_001967]	0.209826	0.283255	0.625269
ATL3	NM_015459	ref|Homo sapiens atlastin GTPase 3 (ATL3), mRNA [NM_015459]	0.212333	0.00580765	0.538221
GTF2A2	NM_004492	ref|Homo sapiens general transcription factor IIA, 2, 12kDa (GTF2A2), mRNA [NM_004492]	0.24902	0.280505	0.600834
NARS2	NM_024678	ref|Homo sapiens asparaginyl-tRNA synthetase 2, mitochondrial (putative) (NARS2), nuclear gene encoding mitochondrial protein, transcript variant 1, mRNA [NM_024678]	-0.0474278	-0.394926	-0.52368
LRCH1	NM_001164213	ref|Homo sapiens leucine-rich repeats and calponin homology (CH) domain containing 1 (LRCH1), transcript variant 3, mRNA [NM_001164213]	0.0542483	-0.359346	-0.504142
MLYCD	NM_012213	ref|Homo sapiens malonyl-CoA decarboxylase (MLYCD), nuclear gene encoding mitochondrial protein, mRNA [NM_012213]	-0.533038	-0.312074	-0.588127
PAFAH1B1	NM_000430	ref|Homo sapiens platelet-activating factor acetylhydrolase 1b, regulatory subunit 1 (45kDa) (PAFAH1B1), mRNA [NM_000430]	-0.137762	-0.398169	-0.600974
C12orf41	NM_017822	ref|Homo sapiens chromosome 12 open reading frame 41 (C12orf41), mRNA [NM_017822]	-0.010235	0.284956	0.415806
APH1A	NM_016022	ref|Homo sapiens anterior pharynx defective 1 homolog A (C. elegans) (APH1A), transcript variant 2, mRNA [NM_016022]	-0.662619	-0.54658	-1.18498
GCFC1	NM_013329	ref|Homo sapiens GC-rich sequence DNA-binding factor 1 (GCFC1), transcript variant 2, mRNA [NM_013329]	0.214678	0.461939	0.488257
PMF1	NM_007221	ref|Homo sapiens polyamine-modulated factor 1 (PMF1), transcript variant 2, mRNA [NM_007221]	-0.166191	-0.530455	-0.786788
NHS	NM_198270	ref|Homo sapiens Nance-Horan syndrome (congenital cataracts and dental anomalies) (NHS), transcript variant 1, mRNA [NM_198270]	-0.447832	-0.631229	-0.675682
BAX	NM_004324	ref|Homo sapiens BCL2-associated X protein (BAX), transcript variant beta, mRNA [NM_004324]	-0.155989	-0.120657	-0.282101
CRTC2	NM_181715	ref|Homo sapiens CREB regulated transcription coactivator 2 (CRTC2), mRNA [NM_181715]	0.206192	0.448696	0.77876
GPAA1	NM_003801	ref|Homo sapiens glycosylphosphatidylinositol anchor attachment protein 1 homolog (yeast) (GPAA1), mRNA [NM_003801]	-0.382227	-0.416858	-0.535128
RAD23A	NM_005053	ref|Homo sapiens RAD23 homolog A (S. cerevisiae) (RAD23A), mRNA [NM_005053]	-0.253732	-0.488486	-0.645344
IMPDH2	NM_000884	ref|Homo sapiens IMP (inosine 5'-monophosphate) dehydrogenase 2 (IMPDH2), mRNA [NM_000884]	0.154123	0.169557	0.498892
OTUD6B	NM_016023	ref|Homo sapiens OTU domain containing 6B (OTUD6B), mRNA [NM_016023]	0.0218608	-0.36834	-0.329984
NECAP2	NM_018090	ref|Homo sapiens NECAP endocytosis associated 2 (NECAP2), transcript variant 1, mRNA [NM_018090]	0.0764166	0.357977	0.452812
RABGAP1L	NM_014857	ref|Homo sapiens RAB GTPase activating protein 1-like (RABGAP1L), transcript variant 1, mRNA [NM_014857]	-0.412232	-0.902478	-1.03971
CCDC82	NM_024725	ref|Homo sapiens coiled-coil domain containing 82 (CCDC82), mRNA [NM_024725]	0.334857	0.357005	0.747748
ZNF684	NM_152373	ref|Homo sapiens zinc finger protein 684 (ZNF684), mRNA [NM_152373]	0.248584	0.451627	0.80895
SRCRB4D	NM_080744	ref|Homo sapiens scavenger receptor cysteine rich domain containing, group B (4 domains) (SRCRB4D), mRNA [NM_080744]	0.11356	0.135025	0.597844
HSP90AA1	NM_005348	ref|Homo sapiens heat shock protein 90kDa alpha (cytosolic), class A member 1 (HSP90AA1), transcript variant 2, mRNA [NM_005348]	-0.0130428	-0.466187	-0.592032
BLOC1S3	NM_212550	ref|Homo sapiens biogenesis of lysosomal organelles complex-1, subunit 3 (BLOC1S3), mRNA [NM_212550]	-0.308319	-0.513638	-0.208793
ZNF684	NM_152373	ref|Homo sapiens zinc finger protein 684 (ZNF684), mRNA [NM_152373]	0.223541	0.377782	0.756818
PABPC5	NM_080832	ref|Homo sapiens poly(A) binding protein, cytoplasmic 5 (PABPC5), mRNA [NM_080832]	0.306875	0.287658	-0.0422208
MGC70870	NR_003682	ref|Homo sapiens C-terminal binding protein 2 pseudogene (MGC70870), non-coding RNA [NR_003682]	-0.214972	-0.273257	-0.619279
ITFG1	NM_030790	ref|Homo sapiens integrin alpha FG-GAP repeat containing 1 (ITFG1), mRNA [NM_030790]	-0.118232	-0.671745	-0.920812
ZNF720	NM_001130913	ref|Homo sapiens zinc finger protein 720 (ZNF720), mRNA [NM_001130913]	-0.0869891	-0.115283	-0.275295
TYW1B	NM_001145441	ref|Homo sapiens tRNA-yW synthesizing protein 1 homolog B (S. cerevisiae) (TYW1B), transcript variant 2, mRNA [NM_001145441]	-0.279432	-0.176917	-0.695735
UBIAD1	NM_013319	ref|Homo sapiens UbiA prenyltransferase domain containing 1 (UBIAD1), mRNA [NM_013319]	0.182284	0.12394	0.629792
RMND5A	NM_022780	ref|Homo sapiens required for meiotic nuclear division 5 homolog A (S. cerevisiae) (RMND5A), mRNA [NM_022780]	0.165265	0.286954	0.339505
RPS19	NM_001022	ref|Homo sapiens ribosomal protein S19 (RPS19), mRNA [NM_001022]	0.388993	0.625772	0.642848
COX19	NM_001031617	ref|Homo sapiens COX19 cytochrome c oxidase assembly homolog (S. cerevisiae) (COX19), mRNA [NM_001031617]	0.0711713	0.43431	0.560098
GAPDH	NM_002046	ref|Homo sapiens glyceraldehyde-3-phosphate dehydrogenase (GAPDH), mRNA [NM_002046]	-0.175846	-0.259355	-0.594804
A_24_P169843	A_24_P169843	Unknown	-0.0102192	-0.443986	-0.832036
NEURL2	NM_080749	ref|Homo sapiens neuralized homolog 2 (Drosophila) (NEURL2), mRNA [NM_080749]	0.219862	0.33259	0.72199
BAX	NM_138764	ref|Homo sapiens BCL2-associated X protein (BAX), transcript variant sigma, mRNA [NM_138764]	-0.364519	-0.177773	-0.63271
SLC35E1	NM_024881	ref|Homo sapiens solute carrier family 35, member E1 (SLC35E1), mRNA [NM_024881]	0.133852	0.237305	0.490935
MLLT1	NM_005934	ref|Homo sapiens myeloid/lymphoid or mixed-lineage leukemia (trithorax homolog, Drosophila); translocated to, 1 (MLLT1), mRNA [NM_005934]	-0.185034	-0.195939	-0.397784
TDRD7	NM_014290	ref|Homo sapiens tudor domain containing 7 (TDRD7), mRNA [NM_014290]	0.2716	0.601142	0.912288
PDGFA	NM_002607	ref|Homo sapiens platelet-derived growth factor alpha polypeptide (PDGFA), transcript variant 1, mRNA [NM_002607]	-0.134858	-0.475117	-0.455599
IFNAR2	NM_000874	ref|Homo sapiens interferon (alpha, beta and omega) receptor 2 (IFNAR2), transcript variant 2, mRNA [NM_000874]	0.029277	0.278444	0.053103
EIF2B1	NM_001414	ref|Homo sapiens eukaryotic translation initiation factor 2B, subunit 1 alpha, 26kDa (EIF2B1), mRNA [NM_001414]	0.108334	0.463355	0.641854
C17orf80	NM_017941	ref|Homo sapiens chromosome 17 open reading frame 80 (C17orf80), transcript variant 1, mRNA [NM_017941]	-0.169367	0.197376	0.413847
EEF1A1	NM_001402	ref|Homo sapiens eukaryotic translation elongation factor 1 alpha 1 (EEF1A1), mRNA [NM_001402]	-0.0905306	-0.0919754	-0.311632
TPD52	NM_001025252	ref|Homo sapiens tumor protein D52 (TPD52), transcript variant 1, mRNA [NM_001025252]	-0.0400287	-0.341203	-0.728615
EXOC2	NM_018303	ref|Homo sapiens exocyst complex component 2 (EXOC2), mRNA [NM_018303]	-0.0307519	-0.465718	-0.741196
ROR1	NM_005012	ref|Homo sapiens receptor tyrosine kinase-like orphan receptor 1 (ROR1), transcript variant 1, mRNA [NM_005012]	-0.202506	-0.951409	-1.37427
LRPPRC	NM_133259	ref|Homo sapiens leucine-rich PPR-motif containing (LRPPRC), mRNA [NM_133259]	0.186015	0.259848	0.0183066
PMM2	NM_000303	ref|Homo sapiens phosphomannomutase 2 (PMM2), mRNA [NM_000303]	-0.115273	-0.590003	-0.967723
B3GAT2	NM_080742	ref|Homo sapiens beta-1,3-glucuronyltransferase 2 (glucuronosyltransferase S) (B3GAT2), mRNA [NM_080742]	-0.237625	-0.77829	-0.640173
FHL2	NM_001039492	ref|Homo sapiens four and a half LIM domains 2 (FHL2), transcript variant 5, mRNA [NM_001039492]	0.165715	-0.573024	-0.713908
ZNF155	NM_003445	ref|Homo sapiens zinc finger protein 155 (ZNF155), transcript variant 1, mRNA [NM_003445]	0.244759	0.459967	0.868692
KIAA0430	NM_014647	ref|Homo sapiens KIAA0430 (KIAA0430), transcript variant 1, mRNA [NM_014647]	0.0947041	0.552192	0.78512
FANCD2	NM_001018115	ref|Homo sapiens Fanconi anemia, complementation group D2 (FANCD2), transcript variant 2, mRNA [NM_001018115]	-0.065355	0.0728414	-0.167227
PARP12	NM_022750	ref|Homo sapiens poly (ADP-ribose) polymerase family, member 12 (PARP12), mRNA [NM_022750]	0.389546	0.148565	0.186838
MAFB	NM_005461	ref|Homo sapiens v-maf musculoaponeurotic fibrosarcoma oncogene homolog B (avian) (MAFB), mRNA [NM_005461]	0.207514	0.786883	1.3249
PDGFA	NM_002607	ref|Homo sapiens platelet-derived growth factor alpha polypeptide (PDGFA), transcript variant 1, mRNA [NM_002607]	-0.142138	-0.403099	-0.341326
ZNF615	NM_001199324	ref|Homo sapiens zinc finger protein 615 (ZNF615), transcript variant 1, mRNA [NM_001199324]	0.459743	0.525051	0.932768
PTRF	NM_012232	ref|Homo sapiens polymerase I and transcript release factor (PTRF), mRNA [NM_012232]	-0.129546	0.492599	0.0634466
FHL2	NM_001039492	ref|Homo sapiens four and a half LIM domains 2 (FHL2), transcript variant 5, mRNA [NM_001039492]	0.15551	-0.612466	-0.69752
THADA	NM_022065	ref|Homo sapiens thyroid adenoma associated (THADA), transcript variant 1, mRNA [NM_022065]	-0.325529	-0.499551	-0.994836
LGTN	NM_006893	ref|Homo sapiens ligatin (LGTN), mRNA [NM_006893]	-0.197804	-0.246497	-0.553924
HESX1	NM_003865	ref|Homo sapiens HESX homeobox 1 (HESX1), mRNA [NM_003865]	-0.24594	-0.0604814	0.782144
KRTAP4-1	NM_033060	ref|Homo sapiens keratin associated protein 4-1 (KRTAP4-1), mRNA [NM_033060]	0.777684	0.608487	1.03345
PCSK5	NM_006200	ref|Homo sapiens proprotein convertase subtilisin/kexin type 5 (PCSK5), transcript variant 2, mRNA [NM_006200]	0.310568	-0.281157	-0.606067
BCORL1	NM_021946	ref|Homo sapiens BCL6 corepressor-like 1 (BCORL1), mRNA [NM_021946]	0.123021	0.467292	0.507847
TUFM	NM_003321	ref|Homo sapiens Tu translation elongation factor, mitochondrial (TUFM), nuclear gene encoding mitochondrial protein, mRNA [NM_003321]	-0.27382	-0.231955	-0.723168
POLR2A	NM_000937	ref|Homo sapiens polymerase (RNA) II (DNA directed) polypeptide A, 220kDa (POLR2A), mRNA [NM_000937]	0.369786	0.955335	1.25439
USP12	NM_182488	ref|Homo sapiens ubiquitin specific peptidase 12 (USP12), mRNA [NM_182488]	-0.140842	-0.375988	-0.515154
LOC145694	XR_109210	ref|PREDICTED: Homo sapiens hypothetical LOC145694 (LOC145694), partial miscRNA [XR_109210]	0.893704	0.37043	0.847403
TSPAN4	NM_001025237	ref|Homo sapiens tetraspanin 4 (TSPAN4), transcript variant 1, mRNA [NM_001025237]	-0.252082	-0.194958	-0.216819
2016-03-07	NM_022826	ref|Homo sapiens membrane-associated ring finger (C3HC4) 7 (MARCH7), mRNA [NM_022826]	0.354953	0.115837	0.722149
MRPL22	NM_001014990	ref|Homo sapiens mitochondrial ribosomal protein L22 (MRPL22), nuclear gene encoding mitochondrial protein, transcript variant 2, mRNA [NM_001014990]	-0.0493816	-0.305298	-0.497856
XPA	NR_027302	ref|Homo sapiens xeroderma pigmentosum, complementation group A (XPA), transcript variant 2, non-coding RNA [NR_027302]	0.31274	0.297809	0.512346
CNNM4	NM_020184	ref|Homo sapiens cyclin M4 (CNNM4), mRNA [NM_020184]	0.23651	1.00985	1.42894
HERC4	NM_022079	ref|Homo sapiens hect domain and RLD 4 (HERC4), transcript variant 1, mRNA [NM_022079]	-0.0137129	0.622464	0.309305
ADARB1	NM_001112	ref|Homo sapiens adenosine deaminase, RNA-specific, B1 (ADARB1), transcript variant 1, mRNA [NM_001112]	-0.504411	0.520339	-0.334725
WDR66	NM_144668	ref|Homo sapiens WD repeat domain 66 (WDR66), transcript variant 1, mRNA [NM_144668]	0.696624	0.158408	0.947984
CTNNBL1	NM_030877	ref|Homo sapiens catenin, beta like 1 (CTNNBL1), mRNA [NM_030877]	-0.167427	-0.428174	-0.62858
SNRPD1	NM_006938	ref|Homo sapiens small nuclear ribonucleoprotein D1 polypeptide 16kDa (SNRPD1), mRNA [NM_006938]	-0.0507365	-0.376389	-0.400549
2016-03-07	NM_022826	ref|Homo sapiens membrane-associated ring finger (C3HC4) 7 (MARCH7), mRNA [NM_022826]	0.272231	0.122824	0.643832
KDM4C	NM_015061	ref|Homo sapiens lysine (K)-specific demethylase 4C (KDM4C), transcript variant 1, mRNA [NM_015061]	-0.129979	-0.511929	-0.846381
UBIAD1	NM_013319	ref|Homo sapiens UbiA prenyltransferase domain containing 1 (UBIAD1), mRNA [NM_013319]	0.161062	0.114341	0.660322
MRPL22	NM_001014990	ref|Homo sapiens mitochondrial ribosomal protein L22 (MRPL22), nuclear gene encoding mitochondrial protein, transcript variant 2, mRNA [NM_001014990]	-0.0317707	-0.323527	-0.503026
WHAMM	NM_001080435	ref|Homo sapiens WAS protein homolog associated with actin, golgi membranes and microtubules (WHAMM), mRNA [NM_001080435]	-0.0689446	-0.120551	-0.0584635
LOC100130966	XM_001725519	ref|PREDICTED: Homo sapiens small ubiquitin-related modifier 2-like (LOC100130966), mRNA [XM_001725519]	0.193785	0.174085	0.60087
ZNF511	NM_145806	ref|Homo sapiens zinc finger protein 511 (ZNF511), mRNA [NM_145806]	-0.121949	-0.65687	-0.673981
MAST2	NM_015112	ref|Homo sapiens microtubule associated serine/threonine kinase 2 (MAST2), mRNA [NM_015112]	-0.0589878	-0.232216	-0.662175
MCM8	NM_182802	ref|Homo sapiens minichromosome maintenance complex component 8 (MCM8), transcript variant 2, mRNA [NM_182802]	0.146425	0.503137	0.485766
UPF2	NM_080599	ref|Homo sapiens UPF2 regulator of nonsense transcripts homolog (yeast) (UPF2), transcript variant 1, mRNA [NM_080599]	-0.0493159	0.239225	0.221487
PIP4K2B	NM_003559	ref|Homo sapiens phosphatidylinositol-5-phosphate 4-kinase, type II, beta (PIP4K2B), mRNA [NM_003559]	-0.0781512	-0.498185	-0.429493
ARHGAP1	NM_004308	ref|Homo sapiens Rho GTPase activating protein 1 (ARHGAP1), mRNA [NM_004308]	0.177273	0.200552	0.454563
HNRNPA1L2	NM_001011724	ref|Homo sapiens heterogeneous nuclear ribonucleoprotein A1-like 2 (HNRNPA1L2), transcript variant 1, mRNA [NM_001011724]	-0.159956	-0.365395	-0.461549
TIMM9	NM_012460	ref|Homo sapiens translocase of inner mitochondrial membrane 9 homolog (yeast) (TIMM9), nuclear gene encoding mitochondrial protein, mRNA [NM_012460]	-0.0512914	-0.223525	-0.43057
LRCH1	NM_015116	ref|Homo sapiens leucine-rich repeats and calponin homology (CH) domain containing 1 (LRCH1), transcript variant 2, mRNA [NM_015116]	0.230955	0.0520645	-0.181363
RPL21	NM_000982	ref|Homo sapiens ribosomal protein L21 (RPL21), mRNA [NM_000982]	0.0492947	0.112776	0.303897
YY1AP1	NM_139118	ref|Homo sapiens YY1 associated protein 1 (YY1AP1), transcript variant 2, mRNA [NM_139118]	0.0741395	0.531589	0.914397
MTHFD1	NM_005956	ref|Homo sapiens methylenetetrahydrofolate dehydrogenase (NADP+ dependent) 1, methenyltetrahydrofolate cyclohydrolase, formyltetrahydrofolate synthetase (MTHFD1), mRNA [NM_005956]	-0.251475	-0.341586	-1.01957
TDRD7	NM_014290	ref|Homo sapiens tudor domain containing 7 (TDRD7), mRNA [NM_014290]	0.3023	0.565924	0.951505
LFNG	NM_001040168	ref|Homo sapiens LFNG O-fucosylpeptide 3-beta-N-acetylglucosaminyltransferase (LFNG), transcript variant 2, mRNA [NM_001040168]	-0.134393	-0.297004	-0.106662
RPL19	NM_000981	ref|Homo sapiens ribosomal protein L19 (RPL19), mRNA [NM_000981]	0.149948	0.360893	0.383716
ANAPC1	NM_022662	ref|Homo sapiens anaphase promoting complex subunit 1 (ANAPC1), mRNA [NM_022662]	-0.140333	-0.255482	-0.536319
ZNF493	NM_001076678	ref|Homo sapiens zinc finger protein 493 (ZNF493), transcript variant 3, mRNA [NM_001076678]	0.125661	0.121543	0.234912
ENST00000318291	ENST00000318291	ref|PREDICTED: Homo sapiens hypothetical LOC100049716 (LOC100049716), partial miscRNA [XR_109114]	0.0352833	1.01766	0.835504
BUB1B	NM_001211	ref|Homo sapiens budding uninhibited by benzimidazoles 1 homolog beta (yeast) (BUB1B), mRNA [NM_001211]	-0.135119	-0.0669054	-0.464424
C10orf11	NM_032024	ref|Homo sapiens chromosome 10 open reading frame 11 (C10orf11), mRNA [NM_032024]	-0.495849	-1.33967	-1.54799
MAX	NM_197957	ref|Homo sapiens MYC associated factor X (MAX), transcript variant 6, mRNA [NM_197957]	0.0713271	0.228214	0.586782
RRAD	NM_004165	ref|Homo sapiens Ras-related associated with diabetes (RRAD), transcript variant 2, mRNA [NM_004165]	-0.249552	0.807293	1.17336
ERLEC1	NM_015701	ref|Homo sapiens endoplasmic reticulum lectin 1 (ERLEC1), transcript variant 1, mRNA [NM_015701]	0.294359	0.311823	0.418963
HSP90AA1	NM_001017963	ref|Homo sapiens heat shock protein 90kDa alpha (cytosolic), class A member 1 (HSP90AA1), transcript variant 1, mRNA [NM_001017963]	-0.0620578	-0.40127	-0.526709
ZNF148	NM_021964	ref|Homo sapiens zinc finger protein 148 (ZNF148), mRNA [NM_021964]	-0.240617	-0.337426	-0.591591
LOC642852	NR_026943	ref|Homo sapiens hypothetical LOC642852 (LOC642852), non-coding RNA [NR_026943]	0.183576	0.664349	1.05675
HBEGF	NM_001945	ref|Homo sapiens heparin-binding EGF-like growth factor (HBEGF), mRNA [NM_001945]	0.523098	0.401155	0.774602
SIAH1	NM_003031	ref|Homo sapiens seven in absentia homolog 1 (Drosophila) (SIAH1), transcript variant 1, mRNA [NM_003031]	0.107741	-0.0282103	0.363442
PKI55	NR_037701	ref|Homo sapiens DKFZp434H1419 (PKI55), non-coding RNA [NR_037701]	-0.41992	-0.623426	-0.960531
SLAIN2	NM_020846	ref|Homo sapiens SLAIN motif family, member 2 (SLAIN2), mRNA [NM_020846]	-0.236941	-0.201107	-0.584392
LCORL	NM_001166139	ref|Homo sapiens ligand dependent nuclear receptor corepressor-like (LCORL), transcript variant 1, mRNA [NM_001166139]	-0.13915	0.266034	-0.00382865
CIT	NM_007174	ref|Homo sapiens citron (rho-interacting, serine/threonine kinase 21) (CIT), mRNA [NM_007174]	-0.170144	-0.263886	-0.425699
RUVBL1	NM_003707	ref|Homo sapiens RuvB-like 1 (E. coli) (RUVBL1), mRNA [NM_003707]	-0.213242	-0.668615	-0.843664
GEMIN5	NM_015465	ref|Homo sapiens gem (nuclear organelle) associated protein 5 (GEMIN5), mRNA [NM_015465]	-0.0538467	-0.340236	-0.55023
CDKN2D	NM_001800	ref|Homo sapiens cyclin-dependent kinase inhibitor 2D (p19, inhibits CDK4) (CDKN2D), transcript variant 1, mRNA [NM_001800]	0.415255	0.115046	1.04302
PCSK6	NM_002570	ref|Homo sapiens proprotein convertase subtilisin/kexin type 6 (PCSK6), transcript variant 1, mRNA [NM_002570]	-0.474183	-0.464986	-0.75594
LOC642361	NR_029407	ref|Homo sapiens hypothetical LOC642361 (LOC642361), non-coding RNA [NR_029407]	-0.177464	0.434967	0.503332
ARID2	NM_152641	ref|Homo sapiens AT rich interactive domain 2 (ARID, RFX-like) (ARID2), mRNA [NM_152641]	-0.0467959	-0.493136	-0.889916
GNPDA1	NM_005471	ref|Homo sapiens glucosamine-6-phosphate deaminase 1 (GNPDA1), mRNA [NM_005471]	-0.289774	-0.211279	-0.370492
APH1A	NM_016022	ref|Homo sapiens anterior pharynx defective 1 homolog A (C. elegans) (APH1A), transcript variant 2, mRNA [NM_016022]	-0.667243	-0.474338	-1.1956
VAPB	NM_004738	ref|Homo sapiens VAMP (vesicle-associated membrane protein)-associated protein B and C (VAPB), transcript variant 1, mRNA [NM_004738]	0.000440615	-0.373429	-0.681273
AIG1	NM_016108	ref|Homo sapiens androgen-induced 1 (AIG1), mRNA [NM_016108]	-0.135774	-0.314502	-0.826592
RHBDD2	NM_001040457	ref|Homo sapiens rhomboid domain containing 2 (RHBDD2), transcript variant 2, mRNA [NM_001040457]	0.0858774	0.160758	0.678719
TSFM	NM_005726	ref|Homo sapiens Ts translation elongation factor, mitochondrial (TSFM), nuclear gene encoding mitochondrial protein, transcript variant 2, mRNA [NM_005726]	-0.17599	-0.215121	-0.339107
DOCK1	NM_001380	ref|Homo sapiens dedicator of cytokinesis 1 (DOCK1), mRNA [NM_001380]	-0.574274	-0.977434	-1.64846
FLNB	NM_001457	ref|Homo sapiens filamin B, beta (FLNB), transcript variant 2, mRNA [NM_001457]	-0.0844334	-0.138675	-0.931695
PARL	NM_018622	ref|Homo sapiens presenilin associated, rhomboid-like (PARL), nuclear gene encoding mitochondrial protein, transcript variant 1, mRNA [NM_018622]	-0.0272891	-0.174011	-0.182137
SNRPD1	NM_006938	ref|Homo sapiens small nuclear ribonucleoprotein D1 polypeptide 16kDa (SNRPD1), mRNA [NM_006938]	-0.0657124	-0.382651	-0.395912
MBD4	NM_003925	ref|Homo sapiens methyl-CpG binding domain protein 4 (MBD4), mRNA [NM_003925]	0.212438	0.493173	0.850656
PLEKHG5	NM_198681	ref|Homo sapiens pleckstrin homology domain containing, family G (with RhoGef domain) member 5 (PLEKHG5), transcript variant 2, mRNA [NM_198681]	0.469431	0.477064	0.776307
PACSIN3	NM_016223	ref|Homo sapiens protein kinase C and casein kinase substrate in neurons 3 (PACSIN3), transcript variant 2, mRNA [NM_016223]	-0.14287	-0.85909	-0.916841
PBLD	NM_001033083	ref|Homo sapiens phenazine biosynthesis-like protein domain containing (PBLD), transcript variant 2, mRNA [NM_001033083]	-0.0564249	0.268256	0.56869
TRRAP	NM_003496	ref|Homo sapiens transformation/transcription domain-associated protein (TRRAP), mRNA [NM_003496]	-0.242019	-0.2664	-0.731061
PRKCD	NM_006254	ref|Homo sapiens protein kinase C, delta (PRKCD), transcript variant 1, mRNA [NM_006254]	0.202169	0.11943	0.354656
VPREB3	NM_013378	ref|Homo sapiens pre-B lymphocyte 3 (VPREB3), mRNA [NM_013378]	-0.0464579	0.273894	0.634207
XPO5	NM_020750	ref|Homo sapiens exportin 5 (XPO5), mRNA [NM_020750]	-0.0841851	-0.306886	-0.464343
HSP90AA1	NM_005348	ref|Homo sapiens heat shock protein 90kDa alpha (cytosolic), class A member 1 (HSP90AA1), transcript variant 2, mRNA [NM_005348]	-0.0528284	-0.480242	-0.566194
UBA52	NM_001033930	ref|Homo sapiens ubiquitin A-52 residue ribosomal protein fusion product 1 (UBA52), transcript variant 1, mRNA [NM_001033930]	0.0991328	0.49845	0.644687
UBIAD1	NM_013319	ref|Homo sapiens UbiA prenyltransferase domain containing 1 (UBIAD1), mRNA [NM_013319]	0.231039	0.0536895	0.654716
GCDH	NM_013976	ref|Homo sapiens glutaryl-CoA dehydrogenase (GCDH), nuclear gene encoding mitochondrial protein, transcript variant 2, mRNA [NM_013976]	-0.203224	-0.329375	-0.479238
A_33_P3342792	A_33_P3342792	Unknown	0.655267	0.1593	0.453359
FMNL2	NM_052905	ref|Homo sapiens formin-like 2 (FMNL2), mRNA [NM_052905]	-0.111287	-0.374402	-0.589779
A_33_P3351529	A_33_P3351529	Unknown	0.181673	0.242238	0.339915
KATNA1	NM_007044	ref|Homo sapiens katanin p60 (ATPase-containing) subunit A 1 (KATNA1), mRNA [NM_007044]	0.139768	0.0743565	0.524966
ERCC5	NM_000123	ref|Homo sapiens excision repair cross-complementing rodent repair deficiency, complementation group 5 (ERCC5), mRNA [NM_000123]	0.167204	0.139026	0.492472
DICER1	NM_001195573	ref|Homo sapiens dicer 1, ribonuclease type III (DICER1), transcript variant 3, mRNA [NM_001195573]	0.0115872	-0.184919	-0.536658
CARM1	NM_199141	ref|Homo sapiens coactivator-associated arginine methyltransferase 1 (CARM1), mRNA [NM_199141]	-0.125459	-0.461661	-0.70341
ACAD9	NM_014049	ref|Homo sapiens acyl-CoA dehydrogenase family, member 9 (ACAD9), nuclear gene encoding mitochondrial protein, transcript variant 1, mRNA [NM_014049]	-0.271476	-0.333078	-0.618255
SUSD4	NM_001037175	ref|Homo sapiens sushi domain containing 4 (SUSD4), transcript variant 2, mRNA [NM_001037175]	-0.599631	-0.0565233	-0.821151
SIAH1	NM_003031	ref|Homo sapiens seven in absentia homolog 1 (Drosophila) (SIAH1), transcript variant 1, mRNA [NM_003031]	0.126923	-0.0264212	0.370665
PPIAL4A	NM_178230	ref|Homo sapiens peptidylprolyl isomerase A (cyclophilin A)-like 4A (PPIAL4A), mRNA [NM_178230]	-0.159239	-0.4246	-0.450908
LRIG1	NM_015541	ref|Homo sapiens leucine-rich repeats and immunoglobulin-like domains 1 (LRIG1), mRNA [NM_015541]	-0.121581	-0.148854	-0.555749
PRDX1	NM_002574	ref|Homo sapiens peroxiredoxin 1 (PRDX1), transcript variant 1, mRNA [NM_002574]	0.196111	0.406234	0.670564
C11orf68	NM_031450	ref|Homo sapiens chromosome 11 open reading frame 68 (C11orf68), transcript variant 2, mRNA [NM_031450]	0.251258	0.241035	0.668035
LOC100129827	NR_034094	ref|Homo sapiens hypothetical LOC100129827 (LOC100129827), non-coding RNA [NR_034094]	0.0604925	0.446926	0.929349
CLIC5	NM_016929	ref|Homo sapiens chloride intracellular channel 5 (CLIC5), nuclear gene encoding mitochondrial protein, transcript variant 2, mRNA [NM_016929]	-0.557935	-0.602081	-0.689706
FANCA	NM_000135	ref|Homo sapiens Fanconi anemia, complementation group A (FANCA), transcript variant 1, mRNA [NM_000135]	-0.0114274	0.416506	-0.0425697
IPO11	NM_016338	ref|Homo sapiens importin 11 (IPO11), transcript variant 2, mRNA [NM_016338]	-0.0739483	-0.479752	-0.684458
BET1L	NM_001098787	ref|Homo sapiens blocked early in transport 1 homolog (S. cerevisiae)-like (BET1L), transcript variant 1, mRNA [NM_001098787]	0.232101	-0.183505	0.550399
MSH3	NM_002439	ref|Homo sapiens mutS homolog 3 (E. coli) (MSH3), mRNA [NM_002439]	-0.213657	-0.530321	-0.609343
NANS	NM_018946	ref|Homo sapiens N-acetylneuraminic acid synthase (NANS), mRNA [NM_018946]	0.218651	0.346076	0.552158
FAM132A	NM_001014980	ref|Homo sapiens family with sequence similarity 132, member A (FAM132A), mRNA [NM_001014980]	0.333711	0.0741022	0.767219
CNP	NM_033133	ref|Homo sapiens 2',3'-cyclic nucleotide 3' phosphodiesterase (CNP), mRNA [NM_033133]	0.047891	0.517696	0.770157
EGFR	NM_005228	ref|Homo sapiens epidermal growth factor receptor (EGFR), transcript variant 1, mRNA [NM_005228]	0.15103	-0.431806	-0.430401
GABRE	NM_004961	ref|Homo sapiens gamma-aminobutyric acid (GABA) A receptor, epsilon (GABRE), mRNA [NM_004961]	-0.077876	0.454856	0.981105
TMEM85	NM_016454	ref|Homo sapiens transmembrane protein 85 (TMEM85), mRNA [NM_016454]	0.0289104	0.0920508	0.255361
AP3M2	NM_006803	ref|Homo sapiens adaptor-related protein complex 3, mu 2 subunit (AP3M2), transcript variant 2, mRNA [NM_006803]	0.218385	0.678424	0.650844
ZFHX3	NM_006885	ref|Homo sapiens zinc finger homeobox 3 (ZFHX3), transcript variant A, mRNA [NM_006885]	-0.148214	-0.613294	-0.935162
ZC3H11A	NM_014827	ref|Homo sapiens zinc finger CCCH-type containing 11A (ZC3H11A), mRNA [NM_014827]	0.1082	0.11558	0.165502
FOS	NM_005252	ref|Homo sapiens FBJ murine osteosarcoma viral oncogene homolog (FOS), mRNA [NM_005252]	0.0976329	-0.789128	-1.10782
FGFR1OP2	NM_001171888	ref|Homo sapiens FGFR1 oncogene partner 2 (FGFR1OP2), transcript variant 3, mRNA [NM_001171888]	0.00927533	-0.0791731	0.280924
FHL2	NM_001039492	ref|Homo sapiens four and a half LIM domains 2 (FHL2), transcript variant 5, mRNA [NM_001039492]	0.167529	-0.581398	-0.687375
DAG1	NM_004393	ref|Homo sapiens dystroglycan 1 (dystrophin-associated glycoprotein 1) (DAG1), transcript variant 2, mRNA [NM_004393]	-0.29897	-0.11081	-0.840536
SMC1A	NM_006306	ref|Homo sapiens structural maintenance of chromosomes 1A (SMC1A), mRNA [NM_006306]	-0.0152166	-0.109486	-0.179799
PPP1R14B	NM_138689	ref|Homo sapiens protein phosphatase 1, regulatory (inhibitor) subunit 14B (PPP1R14B), mRNA [NM_138689]	-0.134051	-0.606929	-0.722374
CEP350	NM_014810	ref|Homo sapiens centrosomal protein 350kDa (CEP350), mRNA [NM_014810]	-0.175567	-0.136048	-0.405943
DNAJC15	NM_013238	ref|Homo sapiens DnaJ (Hsp40) homolog, subfamily C, member 15 (DNAJC15), mRNA [NM_013238]	0.00379325	-0.629189	-0.852855
ENST00000370708	ENST00000370708	ens|zinc finger protein 451 [Source:HGNC Symbol;Acc:21091] [ENST00000370708]	0.098975	0.370771	0.520304
SCRIB	NM_182706	ref|Homo sapiens scribbled homolog (Drosophila) (SCRIB), transcript variant 1, mRNA [NM_182706]	-0.212186	-0.423137	-0.536374
ATP6V0E2	NM_145230	ref|Homo sapiens ATPase, H+ transporting V0 subunit e2 (ATP6V0E2), transcript variant 1, mRNA [NM_145230]	-0.504533	-0.587627	-0.899571
STYX	NM_145251	ref|Homo sapiens serine/threonine/tyrosine interacting protein (STYX), transcript variant 1, mRNA [NM_145251]	0.263027	0.176855	0.476302
ZNF136	NM_003437	ref|Homo sapiens zinc finger protein 136 (ZNF136), mRNA [NM_003437]	0.129121	0.03713	0.562776
AARSD1	NM_025267	ref|Homo sapiens alanyl-tRNA synthetase domain containing 1 (AARSD1), transcript variant 2, mRNA [NM_025267]	-0.164079	-0.296081	-0.636624
SR140	NM_001080415	ref|Homo sapiens U2-associated SR140 protein (SR140), mRNA [NM_001080415]	0.0362634	-0.548249	-0.694022
A_33_P3376071	A_33_P3376071	Unknown	0.107828	0.362415	0.530604
ZNF684	NM_152373	ref|Homo sapiens zinc finger protein 684 (ZNF684), mRNA [NM_152373]	0.577443	0.417175	0.791581
BMP8B	NM_001720	ref|Homo sapiens bone morphogenetic protein 8b (BMP8B), mRNA [NM_001720]	-0.676685	-0.294047	-0.468292
GYG1	NM_004130	ref|Homo sapiens glycogenin 1 (GYG1), transcript variant 1, mRNA [NM_004130]	0.284921	0.371249	0.57112
SNRPF	NM_003095	ref|Homo sapiens small nuclear ribonucleoprotein polypeptide F (SNRPF), mRNA [NM_003095]	-0.153232	-0.39665	-0.60793
BCL2	NM_000633	ref|Homo sapiens B-cell CLL/lymphoma 2 (BCL2), nuclear gene encoding mitochondrial protein, transcript variant alpha, mRNA [NM_000633]	-0.46172	-0.257189	-0.691756
ZFAND3	NM_021943	ref|Homo sapiens zinc finger, AN1-type domain 3 (ZFAND3), mRNA [NM_021943]	-0.173437	-0.771337	-1.05161
NCOR1	NM_006311	ref|Homo sapiens nuclear receptor corepressor 1 (NCOR1), transcript variant 1, mRNA [NM_006311]	-0.275566	-0.496353	-0.691302
ELOVL6	NM_024090	ref|Homo sapiens ELOVL family member 6, elongation of long chain fatty acids (FEN1/Elo2, SUR4/Elo3-like, yeast) (ELOVL6), transcript variant 1, mRNA [NM_024090]	-0.152512	-0.425765	-0.473678
PAFAH1B1	NM_000430	ref|Homo sapiens platelet-activating factor acetylhydrolase 1b, regulatory subunit 1 (45kDa) (PAFAH1B1), mRNA [NM_000430]	-0.13507	-0.213762	-0.64113
SNRPF	NM_003095	ref|Homo sapiens small nuclear ribonucleoprotein polypeptide F (SNRPF), mRNA [NM_003095]	-0.141755	-0.409993	-0.592032
ENST00000407474	ENST00000407474	ens|Uncharacterized protein C9orf102 [Source:UniProtKB/Swiss-Prot;Acc:A4D997] [ENST00000407474]	-0.125586	-0.191131	-0.538508
HESX1	NM_003865	ref|Homo sapiens HESX homeobox 1 (HESX1), mRNA [NM_003865]	-0.181457	0.605063	0.316544
PRKCD	NM_006254	ref|Homo sapiens protein kinase C, delta (PRKCD), transcript variant 1, mRNA [NM_006254]	0.225576	0.0794314	0.343928
MED22	NM_181491	ref|Homo sapiens mediator complex subunit 22 (MED22), transcript variant c, mRNA [NM_181491]	-0.252964	-0.233998	-0.240296
FANCC	NM_000136	ref|Homo sapiens Fanconi anemia, complementation group C (FANCC), mRNA [NM_000136]	-0.212085	-0.402714	-0.721922
PDGFA	NM_002607	ref|Homo sapiens platelet-derived growth factor alpha polypeptide (PDGFA), transcript variant 1, mRNA [NM_002607]	-0.140103	-0.418295	-0.454176
ZFP41	NM_173832	ref|Homo sapiens zinc finger protein 41 homolog (mouse) (ZFP41), mRNA [NM_173832]	-0.105522	0.272312	0.585984
CRTC2	NM_181715	ref|Homo sapiens CREB regulated transcription coactivator 2 (CRTC2), mRNA [NM_181715]	0.176319	0.462306	0.786468
ENST00000511232	ENST00000511232	ens|WD repeat domain 55 [Source:HGNC Symbol;Acc:25971] [ENST00000506393]	0.148772	0.350199	0.593485
EWSR1	NM_013986	ref|Homo sapiens Ewing sarcoma breakpoint region 1 (EWSR1), transcript variant 1, mRNA [NM_013986]	0.15137	0.128601	-0.110185
HIST1H2AH	NM_080596	ref|Homo sapiens histone cluster 1, H2ah (HIST1H2AH), mRNA [NM_080596]	-0.52141	-0.459011	-0.958942
GOSR2	NM_001012511	ref|Homo sapiens golgi SNAP receptor complex member 2 (GOSR2), transcript variant C, mRNA [NM_001012511]	0.263519	0.12663	0.532513
HMBS	NM_000190	ref|Homo sapiens hydroxymethylbilane synthase (HMBS), transcript variant 1, mRNA [NM_000190]	-0.258652	-0.581201	-0.796538
2016-03-07	NM_022826	ref|Homo sapiens membrane-associated ring finger (C3HC4) 7 (MARCH7), mRNA [NM_022826]	0.393091	0.122831	0.636705
DCTPP1	NM_024096	ref|Homo sapiens dCTP pyrophosphatase 1 (DCTPP1), mRNA [NM_024096]	-0.114261	-0.384445	-0.483065
C1orf61	NM_006365	ref|Homo sapiens chromosome 1 open reading frame 61 (C1orf61), mRNA [NM_006365]	0.344255	0.772748	1.22204
A_32_P101860	A_32_P101860	Unknown	0.54441	0.795411	1.11532
RANBP3	NM_007322	ref|Homo sapiens RAN binding protein 3 (RANBP3), transcript variant RANBP3-d, mRNA [NM_007322]	-0.217448	-0.325019	-0.448579
FLJ42627	AK126677	gb|Homo sapiens cDNA FLJ44722 fis, clone BRACE3022847. [AK126677]	-0.31519	-0.27771	-0.427859
TBL1XR1	NM_024665	ref|Homo sapiens transducin (beta)-like 1 X-linked receptor 1 (TBL1XR1), mRNA [NM_024665]	0.115169	-0.461468	-0.812007
COX5B	NM_001862	ref|Homo sapiens cytochrome c oxidase subunit Vb (COX5B), nuclear gene encoding mitochondrial protein, mRNA [NM_001862]	0.236222	0.340866	0.680513
HNRNPH2	NM_019597	ref|Homo sapiens heterogeneous nuclear ribonucleoprotein H2 (H') (HNRNPH2), transcript variant 1, mRNA [NM_019597]	0.304354	0.380617	0.677024
C2orf86	NM_015910	ref|Homo sapiens chromosome 2 open reading frame 86 (C2orf86), transcript variant 2, mRNA [NM_015910]	-0.0826324	-0.375049	-0.476732
CYP3A7	NM_000765	ref|Homo sapiens cytochrome P450, family 3, subfamily A, polypeptide 7 (CYP3A7), mRNA [NM_000765]	0.530892	1.44438	2.2296
AATF	NM_012138	ref|Homo sapiens apoptosis antagonizing transcription factor (AATF), mRNA [NM_012138]	-0.190076	-0.603912	-1.03891
POLR2F	NM_021974	ref|Homo sapiens polymerase (RNA) II (DNA directed) polypeptide F (POLR2F), mRNA [NM_021974]	0.0649033	0.132425	0.243415
TRMT6	NM_015939	ref|Homo sapiens tRNA methyltransferase 6 homolog (S. cerevisiae) (TRMT6), mRNA [NM_015939]	0.145377	0.200307	0.571396
CYP2R1	NM_024514	ref|Homo sapiens cytochrome P450, family 2, subfamily R, polypeptide 1 (CYP2R1), mRNA [NM_024514]	-0.0382279	0.326661	0.48155
SRSF10	NM_006625	ref|Homo sapiens serine/arginine-rich splicing factor 10 (SRSF10), transcript variant 1, mRNA [NM_006625]	0.0697493	-0.115421	-0.0372067
TIMM8A	NM_004085	ref|Homo sapiens translocase of inner mitochondrial membrane 8 homolog A (yeast) (TIMM8A), nuclear gene encoding mitochondrial protein, transcript variant 1, mRNA [NM_004085]	0.290836	0.139374	0.595614
SMC6	NM_024624	ref|Homo sapiens structural maintenance of chromosomes 6 (SMC6), transcript variant 2, mRNA [NM_024624]	0.402574	0.304832	0.427651
BMS1	NM_014753	ref|Homo sapiens BMS1 homolog, ribosome assembly protein (yeast) (BMS1), mRNA [NM_014753]	-0.0771949	0.602877	0.367843
GYLTL1B	NM_152312	ref|Homo sapiens glycosyltransferase-like 1B (GYLTL1B), mRNA [NM_152312]	-0.101094	-0.446561	-0.596766
SKP1	NM_006930	ref|Homo sapiens S-phase kinase-associated protein 1 (SKP1), transcript variant 1, mRNA [NM_006930]	0.0209525	0.444122	0.688302
YY1AP1	NM_139118	ref|Homo sapiens YY1 associated protein 1 (YY1AP1), transcript variant 2, mRNA [NM_139118]	0.118704	0.555908	0.921414
CDK9	NM_001261	ref|Homo sapiens cyclin-dependent kinase 9 (CDK9), mRNA [NM_001261]	0.0389062	0.199907	0.72427
A_33_P3404116	A_33_P3404116	Unknown	-0.547264	-0.539762	-0.959441
CRIPT	NM_014171	ref|Homo sapiens cysteine-rich PDZ-binding protein (CRIPT), mRNA [NM_014171]	0.310495	0.534387	1.17018
DISC1	NM_018662	ref|Homo sapiens disrupted in schizophrenia 1 (DISC1), transcript variant L, mRNA [NM_018662]	-0.0421607	-0.403489	-0.808653
ITPRIPL2	NM_001034841	ref|Homo sapiens inositol 1,4,5-triphosphate receptor interacting protein-like 2 (ITPRIPL2), transcript variant 1, mRNA [NM_001034841]	0.372402	0.458633	0.558102
POLR1D	NM_152705	ref|Homo sapiens polymerase (RNA) I polypeptide D, 16kDa (POLR1D), transcript variant 2, mRNA [NM_152705]	0.251167	-0.119736	-0.229143
ZMYND8	NM_183047	ref|Homo sapiens zinc finger, MYND-type containing 8 (ZMYND8), transcript variant 1, mRNA [NM_183047]	-0.305712	-0.0597792	-0.767484
AMBRA1	NM_017749	ref|Homo sapiens autophagy/beclin-1 regulator 1 (AMBRA1), mRNA [NM_017749]	-0.210655	-0.195303	-0.332051
RPAP3	NM_024604	ref|Homo sapiens RNA polymerase II associated protein 3 (RPAP3), transcript variant 1, mRNA [NM_024604]	0.316997	0.472738	0.666505
ENST00000377043	ENST00000377043	ens|transmembrane protein 2 [Source:HGNC Symbol;Acc:11869] [ENST00000377043]	0.0702179	0.341436	0.642499
APP	NM_201414	ref|Homo sapiens amyloid beta (A4) precursor protein (APP), transcript variant 3, mRNA [NM_201414]	-0.364267	-0.562453	-1.17672
SPECC1L	NM_015330	ref|Homo sapiens sperm antigen with calponin homology and coiled-coil domains 1-like (SPECC1L), transcript variant 1, mRNA [NM_015330]	-0.119349	-0.0323581	-0.44612
SRSF11	NM_001190987	ref|Homo sapiens serine/arginine-rich splicing factor 11 (SRSF11), transcript variant 2, mRNA [NM_001190987]	0.0974903	0.0346152	0.194173
LBH	NM_030915	ref|Homo sapiens limb bud and heart development homolog (mouse) (LBH), mRNA [NM_030915]	-0.173039	0.357698	0.25338
RPAP3	NM_024604	ref|Homo sapiens RNA polymerase II associated protein 3 (RPAP3), transcript variant 1, mRNA [NM_024604]	0.305172	0.471539	0.628357
PDCD1	NM_005018	ref|Homo sapiens programmed cell death 1 (PDCD1), mRNA [NM_005018]	0.333498	0.257006	0.979907
PDGFA	NM_002607	ref|Homo sapiens platelet-derived growth factor alpha polypeptide (PDGFA), transcript variant 1, mRNA [NM_002607]	-0.251705	-0.409908	-0.425411
AP2B1	NM_001030006	ref|Homo sapiens adaptor-related protein complex 2, beta 1 subunit (AP2B1), transcript variant 1, mRNA [NM_001030006]	-0.271505	-0.501644	-1.0286
ZDHHC4	NM_018106	ref|Homo sapiens zinc finger, DHHC-type containing 4 (ZDHHC4), transcript variant 3, mRNA [NM_018106]	0.00532776	0.343028	0.563123
INCENP	NM_001040694	ref|Homo sapiens inner centromere protein antigens 135/155kDa (INCENP), transcript variant 1, mRNA [NM_001040694]	0.14171	0.550562	0.794913
HTT	NM_002111	ref|Homo sapiens huntingtin (HTT), mRNA [NM_002111]	-0.164706	-0.00965564	-0.600164
LPGAT1	NM_014873	ref|Homo sapiens lysophosphatidylglycerol acyltransferase 1 (LPGAT1), mRNA [NM_014873]	0.327317	0.273139	0.791679
CHST14	NM_130468	ref|Homo sapiens carbohydrate (N-acetylgalactosamine 4-0) sulfotransferase 14 (CHST14), mRNA [NM_130468]	-0.418856	-0.394922	-0.622066
MPHOSPH9	NM_022782	ref|Homo sapiens M-phase phosphoprotein 9 (MPHOSPH9), mRNA [NM_022782]	-0.173413	-0.274148	-0.466546
GPRC5A	NM_003979	ref|Homo sapiens G protein-coupled receptor, family C, group 5, member A (GPRC5A), mRNA [NM_003979]	0.685301	0.303374	0.635595
KCTD9	NM_017634	ref|Homo sapiens potassium channel tetramerisation domain containing 9 (KCTD9), mRNA [NM_017634]	0.181301	0.349401	0.839019
CDKN2AIP	NM_017632	ref|Homo sapiens CDKN2A interacting protein (CDKN2AIP), mRNA [NM_017632]	0.00708762	0.329391	0.752961
LCLAT1	NM_182551	ref|Homo sapiens lysocardiolipin acyltransferase 1 (LCLAT1), transcript variant 1, mRNA [NM_182551]	-0.207063	-0.164651	-0.678339
SUSD4	NM_017982	ref|Homo sapiens sushi domain containing 4 (SUSD4), transcript variant 1, mRNA [NM_017982]	-0.576238	-0.455592	-0.877932
SNRPF	NM_003095	ref|Homo sapiens small nuclear ribonucleoprotein polypeptide F (SNRPF), mRNA [NM_003095]	-0.156384	-0.409096	-0.581187
MAPK9	NM_002752	ref|Homo sapiens mitogen-activated protein kinase 9 (MAPK9), transcript variant JNK2-a2, mRNA [NM_002752]	-0.239259	-0.596362	-0.6432
OTUD6B	NM_016023	ref|Homo sapiens OTU domain containing 6B (OTUD6B), mRNA [NM_016023]	-0.0652185	-0.43776	-0.406019
PRKAR1B	NM_002735	ref|Homo sapiens protein kinase, cAMP-dependent, regulatory, type I, beta (PRKAR1B), transcript variant 2, mRNA [NM_002735]	-0.245466	-0.439356	-0.944211
TFB2M	NM_022366	ref|Homo sapiens transcription factor B2, mitochondrial (TFB2M), nuclear gene encoding mitochondrial protein, mRNA [NM_022366]	0.142194	0.204552	0.601154
EZR	NM_003379	ref|Homo sapiens ezrin (EZR), transcript variant 1, mRNA [NM_003379]	-0.121044	-0.453672	-0.756827
MSH3	NM_002439	ref|Homo sapiens mutS homolog 3 (E. coli) (MSH3), mRNA [NM_002439]	-0.185776	-0.491372	-0.61737
ANKHD1-EIF4EBP3	NM_020690	ref|Homo sapiens ANKHD1-EIF4EBP3 readthrough (ANKHD1-EIF4EBP3), mRNA [NM_020690]	0.388667	0.274319	0.828871
C2CD3	AL080220	gb|Homo sapiens mRNA; cDNA DKFZp586P0123 (from clone DKFZp586P0123). [AL080220]	-0.218963	-0.0339108	-0.561887
AGPAT3	NM_020132	ref|Homo sapiens 1-acylglycerol-3-phosphate O-acyltransferase 3 (AGPAT3), transcript variant 1, mRNA [NM_020132]	-0.263236	-0.229626	-0.434737
ATF3	NM_001040619	ref|Homo sapiens activating transcription factor 3 (ATF3), transcript variant 4, mRNA [NM_001040619]	0.453081	0.162003	0.763223
ATG7	NM_006395	ref|Homo sapiens ATG7 autophagy related 7 homolog (S. cerevisiae) (ATG7), transcript variant 1, mRNA [NM_006395]	-0.382063	-0.663346	-0.679732
CDK9	NM_001261	ref|Homo sapiens cyclin-dependent kinase 9 (CDK9), mRNA [NM_001261]	0.0369793	0.203063	0.712238
HELZ	NM_014877	ref|Homo sapiens helicase with zinc finger (HELZ), mRNA [NM_014877]	-0.254436	-0.226888	-1.13048
ABI2	NM_005759	ref|Homo sapiens abl-interactor 2 (ABI2), mRNA [NM_005759]	-0.214693	-0.116924	-0.543408
LOC100133299	XR_108564	ref|PREDICTED: Homo sapiens GALI1870 (LOC100133299), miscRNA [XR_108564]	-0.179716	-0.393067	-0.621226
EPS8L1	NM_133180	ref|Homo sapiens EPS8-like 1 (EPS8L1), transcript variant 1, mRNA [NM_133180]	0.15472	0.424632	0.837702
PRDX1	NM_002574	ref|Homo sapiens peroxiredoxin 1 (PRDX1), transcript variant 1, mRNA [NM_002574]	0.220434	0.415312	0.684133
LAMA5	NM_005560	ref|Homo sapiens laminin, alpha 5 (LAMA5), mRNA [NM_005560]	-0.68195	-0.593261	-1.34384
ATF2	NM_001880	ref|Homo sapiens activating transcription factor 2 (ATF2), mRNA [NM_001880]	0.20161	0.0619593	0.401463
FAM76B	NM_144664	ref|Homo sapiens family with sequence similarity 76, member B (FAM76B), mRNA [NM_144664]	-0.00172149	-0.310267	-0.406956
ITPR2	NM_002223	ref|Homo sapiens inositol 1,4,5-triphosphate receptor, type 2 (ITPR2), mRNA [NM_002223]	-0.502595	-0.307505	-0.7893
XPO5	NM_020750	ref|Homo sapiens exportin 5 (XPO5), mRNA [NM_020750]	0.0349223	0.0908508	-0.106196
CCRL2	NM_003965	ref|Homo sapiens chemokine (C-C motif) receptor-like 2 (CCRL2), transcript variant 1, mRNA [NM_003965]	-0.058868	-0.0410606	0.968936
UBIAD1	NM_013319	ref|Homo sapiens UbiA prenyltransferase domain containing 1 (UBIAD1), mRNA [NM_013319]	0.193842	0.0496015	0.643556
TDRD7	NM_014290	ref|Homo sapiens tudor domain containing 7 (TDRD7), mRNA [NM_014290]	0.276153	0.644054	0.945194
NCOR1	NM_006311	ref|Homo sapiens nuclear receptor corepressor 1 (NCOR1), transcript variant 1, mRNA [NM_006311]	-0.114933	0.0689504	0.103064
UNC13B	NM_006377	ref|Homo sapiens unc-13 homolog B (C. elegans) (UNC13B), mRNA [NM_006377]	-0.180616	-0.432479	-0.560169
NUBP2	NM_012225	ref|Homo sapiens nucleotide binding protein 2 (MinD homolog, E. coli) (NUBP2), mRNA [NM_012225]	-0.214512	-0.517619	-0.524696
TROVE2	NM_001042369	ref|Homo sapiens TROVE domain family, member 2 (TROVE2), transcript variant 1, mRNA [NM_001042369]	0.15694	-0.020235	0.389348
ATP1A2	NM_000702	ref|Homo sapiens ATPase, Na+/K+ transporting, alpha 2 polypeptide (ATP1A2), mRNA [NM_000702]	0.352469	-0.128019	-0.119995
CABYR	NM_012189	ref|Homo sapiens calcium binding tyrosine-(Y)-phosphorylation regulated (CABYR), transcript variant 1, mRNA [NM_012189]	0.772193	1.29619	2.35607
CAMK1D	NM_153498	ref|Homo sapiens calcium/calmodulin-dependent protein kinase ID (CAMK1D), transcript variant 2, mRNA [NM_153498]	-0.778509	-0.48201	-0.999801
TM7SF3	NM_016551	ref|Homo sapiens transmembrane 7 superfamily member 3 (TM7SF3), mRNA [NM_016551]	-0.287716	-0.402358	-0.887665
ERCC5	NM_000123	ref|Homo sapiens excision repair cross-complementing rodent repair deficiency, complementation group 5 (ERCC5), mRNA [NM_000123]	0.169811	0.104904	0.493717
PRDX1	NM_002574	ref|Homo sapiens peroxiredoxin 1 (PRDX1), transcript variant 1, mRNA [NM_002574]	0.191346	0.440621	0.67247
APH1A	NM_016022	ref|Homo sapiens anterior pharynx defective 1 homolog A (C. elegans) (APH1A), transcript variant 2, mRNA [NM_016022]	-0.84438	-0.453085	-1.19203
ICAM1	NM_000201	ref|Homo sapiens intercellular adhesion molecule 1 (ICAM1), mRNA [NM_000201]	0.21245	0.43637	0.425223
LONP1	NM_004793	ref|Homo sapiens lon peptidase 1, mitochondrial (LONP1), nuclear gene encoding mitochondrial protein, mRNA [NM_004793]	-0.168557	-0.545602	-1.15447
NUP210	NM_024923	ref|Homo sapiens nucleoporin 210kDa (NUP210), mRNA [NM_024923]	-0.229333	-0.215598	-0.857234
EIF2B1	NM_001414	ref|Homo sapiens eukaryotic translation initiation factor 2B, subunit 1 alpha, 26kDa (EIF2B1), mRNA [NM_001414]	0.104427	0.487947	0.620809
RAPGEF6	NM_001164389	ref|Homo sapiens Rap guanine nucleotide exchange factor (GEF) 6 (RAPGEF6), transcript variant 5, mRNA [NM_001164389]	-0.108641	-0.0270085	-0.288861
SUN3	NM_001030019	ref|Homo sapiens Sad1 and UNC84 domain containing 3 (SUN3), transcript variant 1, mRNA [NM_001030019]	2.01993	1.51926	2.69749
PSPC1	ENST00000338910	ens|paraspeckle component 1 [Source:HGNC Symbol;Acc:20320] [ENST00000338910]	-0.203529	-0.407249	-0.651429
C10orf2	NM_021830	ref|Homo sapiens chromosome 10 open reading frame 2 (C10orf2), transcript variant 1, mRNA [NM_021830]	0.0269217	0.214097	0.45638
HIST1H2BO	NM_003527	ref|Homo sapiens histone cluster 1, H2bo (HIST1H2BO), mRNA [NM_003527]	-0.379627	-0.788413	-0.872971
CHCHD8	NM_016565	ref|Homo sapiens coiled-coil-helix-coiled-coil-helix domain containing 8 (CHCHD8), mRNA [NM_016565]	0.00143749	0.407345	0.660432
FBXL15	NM_024326	ref|Homo sapiens F-box and leucine-rich repeat protein 15 (FBXL15), mRNA [NM_024326]	0.159612	0.528651	0.744801
MYO5C	NM_018728	ref|Homo sapiens myosin VC (MYO5C), mRNA [NM_018728]	-0.190195	-0.131201	-0.910297
GUSBP1	NR_027028	ref|Homo sapiens glucuronidase, beta pseudogene 1 (GUSBP1), transcript variant 3, non-coding RNA [NR_027028]	-0.339038	-0.155702	-0.352948
IQSEC3	NM_001170738	ref|Homo sapiens IQ motif and Sec7 domain 3 (IQSEC3), transcript variant 1, mRNA [NM_001170738]	-0.217934	-0.556167	-0.70044
EIF2B1	NM_001414	ref|Homo sapiens eukaryotic translation initiation factor 2B, subunit 1 alpha, 26kDa (EIF2B1), mRNA [NM_001414]	0.0903233	0.450667	0.66413
SBDS	NM_016038	ref|Homo sapiens Shwachman-Bodian-Diamond syndrome (SBDS), mRNA [NM_016038]	0.194031	0.14352	0.451817
DPF2	NM_006268	ref|Homo sapiens D4, zinc and double PHD fingers family 2 (DPF2), mRNA [NM_006268]	0.176188	0.55411	0.748188
ZNF197	NM_006991	ref|Homo sapiens zinc finger protein 197 (ZNF197), transcript variant 1, mRNA [NM_006991]	0.428527	0.410554	0.542081
SIRT1	NM_012238	ref|Homo sapiens sirtuin 1 (SIRT1), transcript variant 1, mRNA [NM_012238]	0.275796	0.544109	1.0929
TNIK	NM_015028	ref|Homo sapiens TRAF2 and NCK interacting kinase (TNIK), transcript variant 1, mRNA [NM_015028]	0.347129	-0.572785	-0.742696
COQ5	NM_032314	ref|Homo sapiens coenzyme Q5 homolog, methyltransferase (S. cerevisiae) (COQ5), nuclear gene encoding mitochondrial protein, mRNA [NM_032314]	-0.367314	-0.588779	-0.747919
BAX	NM_138764	ref|Homo sapiens BCL2-associated X protein (BAX), transcript variant sigma, mRNA [NM_138764]	-0.346844	-0.144848	-0.62305
SLC25A35	NM_201520	ref|Homo sapiens solute carrier family 25, member 35 (SLC25A35), mRNA [NM_201520]	0.12793	0.414128	0.617715
KATNA1	NM_007044	ref|Homo sapiens katanin p60 (ATPase-containing) subunit A 1 (KATNA1), mRNA [NM_007044]	0.115556	0.0791216	0.529067
C16orf63	NM_144600	ref|Homo sapiens chromosome 16 open reading frame 63 (C16orf63), mRNA [NM_144600]	-0.117225	-0.330508	-0.603879
ANGPTL4	NM_139314	ref|Homo sapiens angiopoietin-like 4 (ANGPTL4), transcript variant 1, mRNA [NM_139314]	0.347697	1.91043	1.89876
MAFB	NM_005461	ref|Homo sapiens v-maf musculoaponeurotic fibrosarcoma oncogene homolog B (avian) (MAFB), mRNA [NM_005461]	-0.123159	0.247027	0.611022
HMGXB3	NM_014983	ref|Homo sapiens HMG box domain containing 3 (HMGXB3), mRNA [NM_014983]	0.118837	0.410817	0.604668
ZMYM4	NM_005095	ref|Homo sapiens zinc finger, MYM-type 4 (ZMYM4), mRNA [NM_005095]	-0.074633	-0.248074	-0.488806
IGF2R	NM_000876	ref|Homo sapiens insulin-like growth factor 2 receptor (IGF2R), mRNA [NM_000876]	-0.183207	0.258148	-0.558166
PTPN2	NM_080422	ref|Homo sapiens protein tyrosine phosphatase, non-receptor type 2 (PTPN2), transcript variant 2, mRNA [NM_080422]	-0.0958923	-0.23928	-0.554761
PXN	NM_002859	ref|Homo sapiens paxillin (PXN), transcript variant 2, mRNA [NM_002859]	-0.223911	-0.0767428	-0.246453
HOXB4	NM_024015	ref|Homo sapiens homeobox B4 (HOXB4), mRNA [NM_024015]	-0.170543	0.611995	0.716583
SMCR7L	NM_019008	ref|Homo sapiens Smith-Magenis syndrome chromosome region, candidate 7-like (SMCR7L), mRNA [NM_019008]	0.0996926	0.213932	0.489966
HSP90AA2	M30627	gb|Human heat shock protein 86 mRNA, 5'end. [M30627]	-0.0674296	-0.505978	-0.659017
RPL12	NM_000976	ref|Homo sapiens ribosomal protein L12 (RPL12), mRNA [NM_000976]	0.454294	0.399825	0.683616
PMS2	NM_000535	ref|Homo sapiens PMS2 postmeiotic segregation increased 2 (S. cerevisiae) (PMS2), transcript variant 1, mRNA [NM_000535]	-0.181095	0.421636	0.412957
TOMM40	NM_006114	ref|Homo sapiens translocase of outer mitochondrial membrane 40 homolog (yeast) (TOMM40), nuclear gene encoding mitochondrial protein, transcript variant 3, mRNA [NM_006114]	-0.204457	-0.541109	-0.615463
STK24	NM_001032296	ref|Homo sapiens serine/threonine kinase 24 (STK24), transcript variant 2, mRNA [NM_001032296]	0.079118	-0.0611422	-0.460435
CASP7	NM_033338	ref|Homo sapiens caspase 7, apoptosis-related cysteine peptidase (CASP7), transcript variant delta, mRNA [NM_033338]	0.492269	0.65159	1.32546
EIF1	NM_005801	ref|Homo sapiens eukaryotic translation initiation factor 1 (EIF1), mRNA [NM_005801]	0.186368	0.208735	0.501792
TRIM33	NM_015906	ref|Homo sapiens tripartite motif-containing 33 (TRIM33), transcript variant a, mRNA [NM_015906]	0.0231572	-0.356483	-0.626436
KATNA1	NM_007044	ref|Homo sapiens katanin p60 (ATPase-containing) subunit A 1 (KATNA1), mRNA [NM_007044]	0.12462	0.0517027	0.521309
NUDCD3	NM_015332	ref|Homo sapiens NudC domain containing 3 (NUDCD3), mRNA [NM_015332]	0.0753239	-0.804675	-0.276982
AIG1	NM_016108	ref|Homo sapiens androgen-induced 1 (AIG1), mRNA [NM_016108]	-0.146877	-0.0289594	-0.591082
PGAM5	NM_138575	ref|Homo sapiens phosphoglycerate mutase family member 5 (PGAM5), nuclear gene encoding mitochondrial protein, transcript variant 3, mRNA [NM_138575]	-0.0219938	-0.548101	-0.52452
C11orf61	NM_024631	ref|Homo sapiens chromosome 11 open reading frame 61 (C11orf61), mRNA [NM_024631]	0.06086	0.487749	0.517901
HSD17B12	NM_016142	ref|Homo sapiens hydroxysteroid (17-beta) dehydrogenase 12 (HSD17B12), mRNA [NM_016142]	-0.108767	-0.249931	-0.855833
LBH	NM_030915	ref|Homo sapiens limb bud and heart development homolog (mouse) (LBH), mRNA [NM_030915]	-0.200167	0.292664	0.197422
ZFAND3	NM_021943	ref|Homo sapiens zinc finger, AN1-type domain 3 (ZFAND3), mRNA [NM_021943]	-0.252841	-0.758486	-0.979917
BAX	NM_138764	ref|Homo sapiens BCL2-associated X protein (BAX), transcript variant sigma, mRNA [NM_138764]	-0.362127	-0.173046	-0.638345
POLA1	NM_016937	ref|Homo sapiens polymerase (DNA directed), alpha 1, catalytic subunit (POLA1), mRNA [NM_016937]	-0.155791	-0.734686	-1.23093
DNAJC21	NM_001012339	ref|Homo sapiens DnaJ (Hsp40) homolog, subfamily C, member 21 (DNAJC21), transcript variant 2, mRNA [NM_001012339]	-0.00208993	-0.441362	-0.281548
TFDP1	NM_007111	ref|Homo sapiens transcription factor Dp-1 (TFDP1), transcript variant 1, mRNA [NM_007111]	0.027254	-0.145581	-0.378443
ICAM1	NM_000201	ref|Homo sapiens intercellular adhesion molecule 1 (ICAM1), mRNA [NM_000201]	0.0956915	0.432921	0.430684
TRIM44	NM_017583	ref|Homo sapiens tripartite motif-containing 44 (TRIM44), mRNA [NM_017583]	0.150776	-0.351591	-0.53017
OVGP1	NM_002557	ref|Homo sapiens oviductal glycoprotein 1, 120kDa (OVGP1), mRNA [NM_002557]	-0.242204	0.807902	1.19057
ZNF688	NM_145271	ref|Homo sapiens zinc finger protein 688 (ZNF688), transcript variant 1, mRNA [NM_145271]	-0.0879079	0.290237	0.442565
BLZF1	NM_003666	ref|Homo sapiens basic leucine zipper nuclear factor 1 (BLZF1), mRNA [NM_003666]	0.365711	0.250843	0.702252
SRP54	NM_003136	ref|Homo sapiens signal recognition particle 54kDa (SRP54), transcript variant 1, mRNA [NM_003136]	0.240355	0.385786	0.67652
KIAA0556	NM_015202	ref|Homo sapiens KIAA0556 (KIAA0556), mRNA [NM_015202]	-0.123744	-0.197117	-0.369145
CDK8	NM_001260	ref|Homo sapiens cyclin-dependent kinase 8 (CDK8), mRNA [NM_001260]	-0.189573	-0.376496	-0.503237
SMCR7L	NM_019008	ref|Homo sapiens Smith-Magenis syndrome chromosome region, candidate 7-like (SMCR7L), mRNA [NM_019008]	0.123451	0.26873	0.357002
ZBTB5	NM_014872	ref|Homo sapiens zinc finger and BTB domain containing 5 (ZBTB5), mRNA [NM_014872]	0.143323	0.31458	0.739141
LOC100133991	NR_024435	ref|Homo sapiens similar to hCG1995169 (LOC100133991), non-coding RNA [NR_024435]	-0.197806	0.584174	0.590421
KDM4C	NM_015061	ref|Homo sapiens lysine (K)-specific demethylase 4C (KDM4C), transcript variant 1, mRNA [NM_015061]	-0.149455	-0.531357	-0.854612
BIVM	NM_017693	ref|Homo sapiens basic, immunoglobulin-like variable motif containing (BIVM), transcript variant 1, mRNA [NM_017693]	-0.115395	-0.0772967	-0.646676
LOC100009676	NR_024407	ref|Homo sapiens hypothetical LOC100009676 (LOC100009676), non-coding RNA [NR_024407]	0.462596	0.481294	0.821401
PDGFA	NM_002607	ref|Homo sapiens platelet-derived growth factor alpha polypeptide (PDGFA), transcript variant 1, mRNA [NM_002607]	-0.159736	-0.382036	-0.438003
PTPN2	NM_002828	ref|Homo sapiens protein tyrosine phosphatase, non-receptor type 2 (PTPN2), transcript variant 1, mRNA [NM_002828]	0.217663	-0.549934	-0.45971
SCMH1	NM_012236	ref|Homo sapiens sex comb on midleg homolog 1 (Drosophila) (SCMH1), transcript variant 2, mRNA [NM_012236]	-0.212304	-0.590902	-0.681644
C3orf25	NM_207307	ref|Homo sapiens chromosome 3 open reading frame 25 (C3orf25), mRNA [NM_207307]	0.064606	0.187803	0.364322
HSP90AA1	NM_005348	ref|Homo sapiens heat shock protein 90kDa alpha (cytosolic), class A member 1 (HSP90AA1), transcript variant 2, mRNA [NM_005348]	-0.00759002	-0.455371	-0.580447
PSMD2	NM_002808	ref|Homo sapiens proteasome (prosome, macropain) 26S subunit, non-ATPase, 2 (PSMD2), mRNA [NM_002808]	-0.163253	-0.307185	-0.258761
SMCR7L	NM_019008	ref|Homo sapiens Smith-Magenis syndrome chromosome region, candidate 7-like (SMCR7L), mRNA [NM_019008]	0.0275083	0.203861	0.508676
CCDC99	NM_017785	ref|Homo sapiens coiled-coil domain containing 99 (CCDC99), mRNA [NM_017785]	0.188289	0.347054	0.694385
ISCU	NM_014301	ref|Homo sapiens iron-sulfur cluster scaffold homolog (E. coli) (ISCU), nuclear gene encoding mitochondrial protein, transcript variant 1, mRNA [NM_014301]	0.0969438	0.386211	0.705707
UBIAD1	NM_013319	ref|Homo sapiens UbiA prenyltransferase domain containing 1 (UBIAD1), mRNA [NM_013319]	0.173041	0.101661	0.602828
RPL21	NM_000982	ref|Homo sapiens ribosomal protein L21 (RPL21), mRNA [NM_000982]	0.0731119	0.111329	0.277024
ANKRD11	AK125549	gb|Homo sapiens cDNA FLJ43561 fis, clone PUAEN2003079. [AK125549]	-0.193006	-0.444688	-0.769817
SRSF10	ENST00000344989	ens|serine/arginine-rich splicing factor 10 [Source:HGNC Symbol;Acc:16713] [ENST00000344989]	0.0516557	-0.291183	-0.366528
BCL2	NM_000633	ref|Homo sapiens B-cell CLL/lymphoma 2 (BCL2), nuclear gene encoding mitochondrial protein, transcript variant alpha, mRNA [NM_000633]	-0.103165	-0.495565	-0.600803
PAFAH1B1	NM_000430	ref|Homo sapiens platelet-activating factor acetylhydrolase 1b, regulatory subunit 1 (45kDa) (PAFAH1B1), mRNA [NM_000430]	-0.162428	-0.412363	-0.627333
AANAT	NM_001166579	ref|Homo sapiens aralkylamine N-acetyltransferase (AANAT), transcript variant 1, mRNA [NM_001166579]	-0.144785	0.523447	0.874753
FAR1	NM_032228	ref|Homo sapiens fatty acyl CoA reductase 1 (FAR1), mRNA [NM_032228]	0.0709824	-0.178621	-0.635731
PPFIBP1	NM_003622	ref|Homo sapiens PTPRF interacting protein, binding protein 1 (liprin beta 1) (PPFIBP1), transcript variant 1, mRNA [NM_003622]	-0.104376	-0.599675	-0.956829
CPT1C	NM_001199752	ref|Homo sapiens carnitine palmitoyltransferase 1C (CPT1C), transcript variant 3, mRNA [NM_001199752]	0.503509	-0.0438771	1.51667
TBL1Y	NM_033284	ref|Homo sapiens transducin (beta)-like 1, Y-linked (TBL1Y), transcript variant 1, mRNA [NM_033284]	-0.485831	-1.18712	-1.2125
MBD1	NM_015845	ref|Homo sapiens methyl-CpG binding domain protein 1 (MBD1), transcript variant 2, mRNA [NM_015845]	0.27872	0.0701919	0.461171
ZNF7	NM_003416	ref|Homo sapiens zinc finger protein 7 (ZNF7), mRNA [NM_003416]	0.144503	0.246393	0.516198
GAPDH	NM_002046	ref|Homo sapiens glyceraldehyde-3-phosphate dehydrogenase (GAPDH), mRNA [NM_002046]	-0.15514	-0.212672	-0.591431
A_33_P3234641	A_33_P3234641	Unknown	0.210745	0.580502	0.834363
RASAL2	NM_170692	ref|Homo sapiens RAS protein activator like 2 (RASAL2), transcript variant 2, mRNA [NM_170692]	-0.260212	-0.67047	-1.0386
C1orf55	NM_152608	ref|Homo sapiens chromosome 1 open reading frame 55 (C1orf55), mRNA [NM_152608]	0.393587	0.276787	0.885939
PCBP2	NM_005016	ref|Homo sapiens poly(rC) binding protein 2 (PCBP2), transcript variant 1, mRNA [NM_005016]	-0.050263	-0.166692	-0.158239
ZNF684	NM_152373	ref|Homo sapiens zinc finger protein 684 (ZNF684), mRNA [NM_152373]	0.235886	0.595414	0.896447
HIST2H3D	NM_001123375	ref|Homo sapiens histone cluster 2, H3d (HIST2H3D), mRNA [NM_001123375]	-0.223272	-0.796605	-0.761088
EEF1A1	NM_001402	ref|Homo sapiens eukaryotic translation elongation factor 1 alpha 1 (EEF1A1), mRNA [NM_001402]	-0.238445	-0.253886	-0.504784
GNB2L1	NM_006098	ref|Homo sapiens guanine nucleotide binding protein (G protein), beta polypeptide 2-like 1 (GNB2L1), mRNA [NM_006098]	-0.137682	-0.327444	-0.471216
TRAPPC10	NM_003274	ref|Homo sapiens trafficking protein particle complex 10 (TRAPPC10), mRNA [NM_003274]	0.135081	0.155097	0.0755584
RPS18	NM_022551	ref|Homo sapiens ribosomal protein S18 (RPS18), mRNA [NM_022551]	-0.024235	-0.011467	-0.349257
SNRPF	NM_003095	ref|Homo sapiens small nuclear ribonucleoprotein polypeptide F (SNRPF), mRNA [NM_003095]	-0.163896	-0.397673	-0.572833
HSP90AA1	NM_005348	ref|Homo sapiens heat shock protein 90kDa alpha (cytosolic), class A member 1 (HSP90AA1), transcript variant 2, mRNA [NM_005348]	-0.0496224	-0.476055	-0.61491
YIPF5	NM_001024947	ref|Homo sapiens Yip1 domain family, member 5 (YIPF5), transcript variant 1, mRNA [NM_001024947]	0.507329	0.153277	0.637303
HN1	NM_001002033	ref|Homo sapiens hematological and neurological expressed 1 (HN1), transcript variant 3, mRNA [NM_001002033]	0.2622	0.276676	0.730858
ENST00000377296	ENST00000377296	ens|Putative uncharacterized protein ENSP00000366511 [Source:UniProtKB/TrEMBL;Acc:B7WP54] [ENST00000377296]	-0.146108	0.90399	0.97073
CADM1	NM_001098517	ref|Homo sapiens cell adhesion molecule 1 (CADM1), transcript variant 2, mRNA [NM_001098517]	-0.272031	-0.789091	-1.26555
KRT18	NM_000224	ref|Homo sapiens keratin 18 (KRT18), transcript variant 1, mRNA [NM_000224]	0.347344	-0.0701602	-0.253752
PLIN2	NM_001122	ref|Homo sapiens perilipin 2 (PLIN2), mRNA [NM_001122]	0.501855	0.724108	1.15596
TRIM39	NM_021253	ref|Homo sapiens tripartite motif-containing 39 (TRIM39), transcript variant 1, mRNA [NM_021253]	0.264568	0.341434	0.643323
UBIAD1	NM_013319	ref|Homo sapiens UbiA prenyltransferase domain containing 1 (UBIAD1), mRNA [NM_013319]	0.235265	0.162549	0.610035
PXN	NM_001080855	ref|Homo sapiens paxillin (PXN), transcript variant 1, mRNA [NM_001080855]	-0.29611	-0.59741	-0.716689
WDR27	NM_182552	ref|Homo sapiens WD repeat domain 27 (WDR27), mRNA [NM_182552]	-0.363399	0.182492	-0.45965
SLC35E1	NM_024881	ref|Homo sapiens solute carrier family 35, member E1 (SLC35E1), mRNA [NM_024881]	-0.079638	-0.109657	-0.0821374
PDLIM5	NM_006457	ref|Homo sapiens PDZ and LIM domain 5 (PDLIM5), transcript variant 1, mRNA [NM_006457]	0.0834082	-0.545963	-1.1971
ENST00000400224	ENST00000400224	ens|dedicator of cytokinesis 9 [Source:HGNC Symbol;Acc:14132] [ENST00000400224]	-0.478391	-0.526343	-1.15541
SMC6	NM_024624	ref|Homo sapiens structural maintenance of chromosomes 6 (SMC6), transcript variant 2, mRNA [NM_024624]	0.381034	0.339995	0.404567
SMCR7L	NM_019008	ref|Homo sapiens Smith-Magenis syndrome chromosome region, candidate 7-like (SMCR7L), mRNA [NM_019008]	0.107185	0.249829	0.450516
EHMT1	NM_024757	ref|Homo sapiens euchromatic histone-lysine N-methyltransferase 1 (EHMT1), transcript variant 1, mRNA [NM_024757]	-0.545575	-0.711832	-0.838716
GLI2	NM_005270	ref|Homo sapiens GLI family zinc finger 2 (GLI2), mRNA [NM_005270]	-0.102151	-0.45201	0.491232
SNRPD1	NM_006938	ref|Homo sapiens small nuclear ribonucleoprotein D1 polypeptide 16kDa (SNRPD1), mRNA [NM_006938]	-0.0304271	-0.363201	-0.38728
EIF2B1	NM_001414	ref|Homo sapiens eukaryotic translation initiation factor 2B, subunit 1 alpha, 26kDa (EIF2B1), mRNA [NM_001414]	0.0831654	0.457688	0.653068
OAT	NM_000274	ref|Homo sapiens ornithine aminotransferase (OAT), nuclear gene encoding mitochondrial protein, transcript variant 1, mRNA [NM_000274]	0.0351874	1.2489	1.54559
YY1AP1	NM_139118	ref|Homo sapiens YY1 associated protein 1 (YY1AP1), transcript variant 2, mRNA [NM_139118]	0.0865138	0.540939	0.922727
ARHGEF7	NM_003899	ref|Homo sapiens Rho guanine nucleotide exchange factor (GEF) 7 (ARHGEF7), transcript variant 1, mRNA [NM_003899]	0.0164491	-0.152846	-0.400288
SYNJ2	NM_003898	ref|Homo sapiens synaptojanin 2 (SYNJ2), transcript variant 1, mRNA [NM_003898]	0.0400286	0.132728	-0.220583
NMB	NM_021077	ref|Homo sapiens neuromedin B (NMB), transcript variant 1, mRNA [NM_021077]	0.687941	0.937285	2.25203
RPUSD4	NM_032795	ref|Homo sapiens RNA pseudouridylate synthase domain containing 4 (RPUSD4), transcript variant 1, mRNA [NM_032795]	-0.171169	-0.25	-0.570335
HSPG2	NM_005529	ref|Homo sapiens heparan sulfate proteoglycan 2 (HSPG2), mRNA [NM_005529]	-0.622497	-0.772489	-1.37346
LCE1A	NM_178348	ref|Homo sapiens late cornified envelope 1A (LCE1A), mRNA [NM_178348]	-0.150843	-0.520313	-0.755886
G3BP1	ENST00000394123	ens|GTPase activating protein (SH3 domain) binding protein 1 [Source:HGNC Symbol;Acc:30292] [ENST00000394123]	-0.18188	-0.507633	-0.659664
PRKAR1B	NM_001164761	ref|Homo sapiens protein kinase, cAMP-dependent, regulatory, type I, beta (PRKAR1B), transcript variant 1, mRNA [NM_001164761]	-0.206596	-0.19988	-0.805626
NQO2	NM_000904	ref|Homo sapiens NAD(P)H dehydrogenase, quinone 2 (NQO2), mRNA [NM_000904]	-0.077338	-0.551548	-0.700642
RHOT1	NM_018307	ref|Homo sapiens ras homolog gene family, member T1 (RHOT1), transcript variant 3, mRNA [NM_018307]	-0.246672	-0.726967	-0.729333
NUDT8	NM_181843	ref|Homo sapiens nudix (nucleoside diphosphate linked moiety X)-type motif 8 (NUDT8), mRNA [NM_181843]	0.0188727	0.241241	0.386759
TAF1C	NM_005679	ref|Homo sapiens TATA box binding protein (TBP)-associated factor, RNA polymerase I, C, 110kDa (TAF1C), transcript variant 1, mRNA [NM_005679]	0.0213302	0.607849	0.540165
A_24_P230057	A_24_P230057	Unknown	0.0418551	-0.422529	-0.744298
ZNF816	NM_001031665	ref|Homo sapiens zinc finger protein 816 (ZNF816), mRNA [NM_001031665]	0.298772	0.402045	1.14288
EAPP	NM_018453	ref|Homo sapiens E2F-associated phosphoprotein (EAPP), mRNA [NM_018453]	0.0593441	0.413893	0.782735
HS2ST1	NM_012262	ref|Homo sapiens heparan sulfate 2-O-sulfotransferase 1 (HS2ST1), transcript variant 1, mRNA [NM_012262]	0.0131256	-0.339285	-0.645853
LIMCH1	NM_014988	ref|Homo sapiens LIM and calponin homology domains 1 (LIMCH1), transcript variant 1, mRNA [NM_014988]	0.0222965	-0.588265	-0.664856
CD24	NM_013230	ref|Homo sapiens CD24 molecule (CD24), mRNA [NM_013230]	0.400789	1.3405	1.53564
PHF13	NM_153812	ref|Homo sapiens PHD finger protein 13 (PHF13), mRNA [NM_153812]	0.0886029	0.186383	0.413047
MRPL22	NM_001014990	ref|Homo sapiens mitochondrial ribosomal protein L22 (MRPL22), nuclear gene encoding mitochondrial protein, transcript variant 2, mRNA [NM_001014990]	-0.0801339	-0.282803	-0.499187
MCOLN1	NM_020533	ref|Homo sapiens mucolipin 1 (MCOLN1), mRNA [NM_020533]	0.0882941	0.418218	0.509463
EPB41L1	NM_177996	ref|Homo sapiens erythrocyte membrane protein band 4.1-like 1 (EPB41L1), transcript variant 2, mRNA [NM_177996]	-0.227182	-0.557654	-0.693272
RSBN1	NM_018364	ref|Homo sapiens round spermatid basic protein 1 (RSBN1), mRNA [NM_018364]	0.143047	0.223818	0.621987
CALM2	NM_001743	ref|Homo sapiens calmodulin 2 (phosphorylase kinase, delta) (CALM2), mRNA [NM_001743]	0.261666	0.321122	0.550296
RWDD2A	NM_033411	ref|Homo sapiens RWD domain containing 2A (RWDD2A), mRNA [NM_033411]	0.277924	0.271457	0.665632
MID1	NM_000381	ref|Homo sapiens midline 1 (Opitz/BBB syndrome) (MID1), transcript variant 1, mRNA [NM_000381]	-0.165776	-1.04982	-1.13069
HSPA8	NM_153201	ref|Homo sapiens heat shock 70kDa protein 8 (HSPA8), transcript variant 2, mRNA [NM_153201]	-0.0422262	-0.526808	-0.720471
ICAM1	NM_000201	ref|Homo sapiens intercellular adhesion molecule 1 (ICAM1), mRNA [NM_000201]	0.184812	0.371178	0.447529
LIMCH1	NM_014988	ref|Homo sapiens LIM and calponin homology domains 1 (LIMCH1), transcript variant 1, mRNA [NM_014988]	-0.130519	-0.58671	-1.10322
KDM5B	NM_006618	ref|Homo sapiens lysine (K)-specific demethylase 5B (KDM5B), mRNA [NM_006618]	0.160061	0.673883	0.705694
PARVB	NM_001003828	ref|Homo sapiens parvin, beta (PARVB), transcript variant 1, mRNA [NM_001003828]	-0.2521	-0.683519	-0.890915
TMEM159	NM_020422	ref|Homo sapiens transmembrane protein 159 (TMEM159), mRNA [NM_020422]	0.323746	0.914113	1.00248
A_33_P3320943	A_33_P3320943	Unknown	-0.166725	-0.422302	-0.652153
LBH	NM_030915	ref|Homo sapiens limb bud and heart development homolog (mouse) (LBH), mRNA [NM_030915]	-0.175574	0.323908	0.175748
SMPD3	NM_018667	ref|Homo sapiens sphingomyelin phosphodiesterase 3, neutral membrane (neutral sphingomyelinase II) (SMPD3), mRNA [NM_018667]	0.761973	0.776919	1.98886
TTBK2	NM_173500	ref|Homo sapiens tau tubulin kinase 2 (TTBK2), mRNA [NM_173500]	-0.343304	-0.0822634	-0.522752
CCDC126	NM_138771	ref|Homo sapiens coiled-coil domain containing 126 (CCDC126), mRNA [NM_138771]	0.192178	0.706849	0.917069
PHIP	NM_017934	ref|Homo sapiens pleckstrin homology domain interacting protein (PHIP), mRNA [NM_017934]	-0.0177843	-0.24348	-0.391918
KIAA1549	NM_001164665	ref|Homo sapiens KIAA1549 (KIAA1549), transcript variant 2, mRNA [NM_001164665]	-0.340152	0.124529	-0.680641
POTEF	NM_001099771	ref|Homo sapiens POTE ankyrin domain family, member F (POTEF), mRNA [NM_001099771]	0.0486711	-0.826408	-1.00025
TBL1Y	NM_033284	ref|Homo sapiens transducin (beta)-like 1, Y-linked (TBL1Y), transcript variant 1, mRNA [NM_033284]	-0.429952	-1.10989	-1.26301
ABHD5	NM_016006	ref|Homo sapiens abhydrolase domain containing 5 (ABHD5), mRNA [NM_016006]	0.0821488	0.0423889	0.576368
EIF2B1	NM_001414	ref|Homo sapiens eukaryotic translation initiation factor 2B, subunit 1 alpha, 26kDa (EIF2B1), mRNA [NM_001414]	0.0908466	0.454936	0.661932
PODXL2	NM_015720	ref|Homo sapiens podocalyxin-like 2 (PODXL2), mRNA [NM_015720]	-0.246913	-0.422715	-0.724495
PRKCD	NM_006254	ref|Homo sapiens protein kinase C, delta (PRKCD), transcript variant 1, mRNA [NM_006254]	0.220875	0.0815595	0.35552
A_33_P3280355	A_33_P3280355	Unknown	-0.0409341	-0.424568	-0.36184
C10orf11	NM_032024	ref|Homo sapiens chromosome 10 open reading frame 11 (C10orf11), mRNA [NM_032024]	-0.524594	-1.39216	-1.51422
PRIM2	NM_000947	ref|Homo sapiens primase, DNA, polypeptide 2 (58kDa) (PRIM2), mRNA [NM_000947]	-0.0410002	-0.675995	-0.617544
HNRNPH2	NM_019597	ref|Homo sapiens heterogeneous nuclear ribonucleoprotein H2 (H') (HNRNPH2), transcript variant 1, mRNA [NM_019597]	0.317419	0.404299	0.670177
SNRPF	NM_003095	ref|Homo sapiens small nuclear ribonucleoprotein polypeptide F (SNRPF), mRNA [NM_003095]	-0.152722	-0.420702	-0.61825
PLEKHB2	NM_001100623	ref|Homo sapiens pleckstrin homology domain containing, family B (evectins) member 2 (PLEKHB2), transcript variant 3, mRNA [NM_001100623]	0.232629	0.415576	0.702564
CECR5	NM_033070	ref|Homo sapiens cat eye syndrome chromosome region, candidate 5 (CECR5), transcript variant 2, mRNA [NM_033070]	-0.0898064	-0.552506	-0.576243
OAS2	NM_002535	ref|Homo sapiens 2'-5'-oligoadenylate synthetase 2, 69/71kDa (OAS2), transcript variant 2, mRNA [NM_002535]	-0.236752	-0.243568	0.0586264
PLEKHG2	NM_022835	ref|Homo sapiens pleckstrin homology domain containing, family G (with RhoGef domain) member 2 (PLEKHG2), mRNA [NM_022835]	0.0950782	0.514161	0.708426
LRIG1	NM_015541	ref|Homo sapiens leucine-rich repeats and immunoglobulin-like domains 1 (LRIG1), mRNA [NM_015541]	-0.0878276	-0.107233	-0.527682
A_24_P84970	A_24_P84970	Unknown	0.0607423	-0.439596	-0.571625
RUNDC2A	NM_032167	ref|Homo sapiens RUN domain containing 2A (RUNDC2A), mRNA [NM_032167]	-0.256882	-0.150526	-0.125076
HN1	NM_001002033	ref|Homo sapiens hematological and neurological expressed 1 (HN1), transcript variant 3, mRNA [NM_001002033]	0.253505	0.259098	0.693171
HSP90AA1	NM_005348	ref|Homo sapiens heat shock protein 90kDa alpha (cytosolic), class A member 1 (HSP90AA1), transcript variant 2, mRNA [NM_005348]	-0.0112512	-0.440853	-0.552376
TBL1Y	NM_033284	ref|Homo sapiens transducin (beta)-like 1, Y-linked (TBL1Y), transcript variant 1, mRNA [NM_033284]	-0.528262	-1.16316	-1.34271
C17orf42	NM_024683	ref|Homo sapiens chromosome 17 open reading frame 42 (C17orf42), mRNA [NM_024683]	0.164255	0.363882	0.409413
AFG3L2	NM_006796	ref|Homo sapiens AFG3 ATPase family gene 3-like 2 (S. cerevisiae) (AFG3L2), nuclear gene encoding mitochondrial protein, mRNA [NM_006796]	-0.0476769	-0.376209	-0.539066
GCFC1	NM_013329	ref|Homo sapiens GC-rich sequence DNA-binding factor 1 (GCFC1), transcript variant 2, mRNA [NM_013329]	-0.122886	-0.0262581	0.188342
MRPL22	NM_001014990	ref|Homo sapiens mitochondrial ribosomal protein L22 (MRPL22), nuclear gene encoding mitochondrial protein, transcript variant 2, mRNA [NM_001014990]	-0.0806013	-0.28019	-0.512208
BCL2L12	NM_138639	ref|Homo sapiens BCL2-like 12 (proline rich) (BCL2L12), transcript variant 1, mRNA [NM_138639]	-0.00685552	-0.00279325	0.0165475
FHL2	NM_201555	ref|Homo sapiens four and a half LIM domains 2 (FHL2), transcript variant 2, mRNA [NM_201555]	-0.0269191	-0.730378	-0.911525
OTUD6B	NM_016023	ref|Homo sapiens OTU domain containing 6B (OTUD6B), mRNA [NM_016023]	-0.0570839	-0.395302	-0.409191
RPAP3	NM_024604	ref|Homo sapiens RNA polymerase II associated protein 3 (RPAP3), transcript variant 1, mRNA [NM_024604]	0.308857	0.443698	0.682943
HMBS	NM_000190	ref|Homo sapiens hydroxymethylbilane synthase (HMBS), transcript variant 1, mRNA [NM_000190]	-0.263285	-0.555813	-0.79989
HSP90AA1	NM_005348	ref|Homo sapiens heat shock protein 90kDa alpha (cytosolic), class A member 1 (HSP90AA1), transcript variant 2, mRNA [NM_005348]	-0.031224	-0.476286	-0.582896
CEP350	NM_014810	ref|Homo sapiens centrosomal protein 350kDa (CEP350), mRNA [NM_014810]	-0.169813	-0.154524	-0.34241
SLN	NM_003063	ref|Homo sapiens sarcolipin (SLN), mRNA [NM_003063]	0.263672	0.499888	1.14533
NRP2	NM_201264	ref|Homo sapiens neuropilin 2 (NRP2), transcript variant 6, mRNA [NM_201264]	0.600356	0.616579	0.712357
PHIP	NM_017934	ref|Homo sapiens pleckstrin homology domain interacting protein (PHIP), mRNA [NM_017934]	-0.0584805	-0.196172	-0.377752
LIN52	NM_001024674	ref|Homo sapiens lin-52 homolog (C. elegans) (LIN52), mRNA [NM_001024674]	-0.0763599	-0.563213	-0.582227
HNRNPH2	NM_019597	ref|Homo sapiens heterogeneous nuclear ribonucleoprotein H2 (H') (HNRNPH2), transcript variant 1, mRNA [NM_019597]	0.325471	0.350801	0.648553
WDR34	NM_052844	ref|Homo sapiens WD repeat domain 34 (WDR34), mRNA [NM_052844]	-0.169473	-0.307818	-0.455826
SNRPF	NM_003095	ref|Homo sapiens small nuclear ribonucleoprotein polypeptide F (SNRPF), mRNA [NM_003095]	-0.165362	-0.39295	-0.602143
RFWD2	NM_022457	ref|Homo sapiens ring finger and WD repeat domain 2 (RFWD2), transcript variant 1, mRNA [NM_022457]	0.0574808	-0.726239	-0.790051
SRSF10	NM_001191009	ref|Homo sapiens serine/arginine-rich splicing factor 10 (SRSF10), transcript variant 6, mRNA [NM_001191009]	0.0582087	-0.152159	-0.0503163
ARHGAP19	NM_032900	ref|Homo sapiens Rho GTPase activating protein 19 (ARHGAP19), mRNA [NM_032900]	-0.218529	-0.433229	-0.481623
CPNE7	NM_014427	ref|Homo sapiens copine VII (CPNE7), transcript variant 2, mRNA [NM_014427]	-0.214555	0.334516	-0.742086
UBAP2	NM_018449	ref|Homo sapiens ubiquitin associated protein 2 (UBAP2), mRNA [NM_018449]	-0.217136	-0.304386	-0.601194
CHIC2	NM_012110	ref|Homo sapiens cysteine-rich hydrophobic domain 2 (CHIC2), mRNA [NM_012110]	0.281817	0.287954	0.475101
P4HA1	NM_001142595	ref|Homo sapiens prolyl 4-hydroxylase, alpha polypeptide I (P4HA1), transcript variant 3, mRNA [NM_001142595]	0.525623	0.619167	0.909848
LRIG1	NM_015541	ref|Homo sapiens leucine-rich repeats and immunoglobulin-like domains 1 (LRIG1), mRNA [NM_015541]	-0.0980082	-0.105703	-0.530968
KIAA1737	NM_033426	ref|Homo sapiens KIAA1737 (KIAA1737), mRNA [NM_033426]	0.186452	0.396591	0.713013
REXO4	NM_020385	ref|Homo sapiens REX4, RNA exonuclease 4 homolog (S. cerevisiae) (REXO4), mRNA [NM_020385]	0.379776	0.383506	0.843869
ZBTB47	NM_145166	ref|Homo sapiens zinc finger and BTB domain containing 47 (ZBTB47), mRNA [NM_145166]	0.499658	0.337175	0.570035
MYO5C	NM_018728	ref|Homo sapiens myosin VC (MYO5C), mRNA [NM_018728]	-0.0523137	-0.0907337	-0.784435
SLC29A3	NM_018344	ref|Homo sapiens solute carrier family 29 (nucleoside transporters), member 3 (SLC29A3), transcript variant 1, mRNA [NM_018344]	0.352455	0.581174	0.9475
TRIM13	NM_213590	ref|Homo sapiens tripartite motif-containing 13 (TRIM13), transcript variant 3, mRNA [NM_213590]	0.155429	0.457388	0.704998
ENST00000486067	ENST00000486067	gb|Homo sapiens cDNA clone IMAGE:3140573, **** WARNING: chimeric clone ****. [BC007663]	-0.0609635	-0.311396	-0.965034
MTHFD1	NM_005956	ref|Homo sapiens methylenetetrahydrofolate dehydrogenase (NADP+ dependent) 1, methenyltetrahydrofolate cyclohydrolase, formyltetrahydrofolate synthetase (MTHFD1), mRNA [NM_005956]	-0.239271	-0.287207	-1.03381
PAQR3	NM_001040202	ref|Homo sapiens progestin and adipoQ receptor family member III (PAQR3), mRNA [NM_001040202]	0.598991	0.277878	0.705171
FAM169A	NM_015566	ref|Homo sapiens family with sequence similarity 169, member A (FAM169A), mRNA [NM_015566]	-0.255641	-0.451142	-0.680512
PARP12	NM_022750	ref|Homo sapiens poly (ADP-ribose) polymerase family, member 12 (PARP12), mRNA [NM_022750]	0.402982	0.136416	0.266761
BET1L	NM_016526	ref|Homo sapiens blocked early in transport 1 homolog (S. cerevisiae)-like (BET1L), transcript variant 2, mRNA [NM_016526]	0.150286	-0.0622981	0.0394935
IK	NM_006083	ref|Homo sapiens IK cytokine, down-regulator of HLA II (IK), mRNA [NM_006083]	0.133086	0.248247	0.543572
ULBP1	NM_025218	ref|Homo sapiens UL16 binding protein 1 (ULBP1), mRNA [NM_025218]	0.400111	0.714989	0.99545
CRTC2	NM_181715	ref|Homo sapiens CREB regulated transcription coactivator 2 (CRTC2), mRNA [NM_181715]	0.181507	0.427181	0.78493
HESX1	NM_003865	ref|Homo sapiens HESX homeobox 1 (HESX1), mRNA [NM_003865]	0.0835697	0.232889	0.476234
CAMK1D	NM_020397	ref|Homo sapiens calcium/calmodulin-dependent protein kinase ID (CAMK1D), transcript variant 1, mRNA [NM_020397]	-0.599685	-0.353275	-0.871742
BLOC1S3	NM_212550	ref|Homo sapiens biogenesis of lysosomal organelles complex-1, subunit 3 (BLOC1S3), mRNA [NM_212550]	0.0985616	0.536789	0.734679
AMBRA1	NM_017749	ref|Homo sapiens autophagy/beclin-1 regulator 1 (AMBRA1), mRNA [NM_017749]	-0.197981	-0.0690758	-0.39481
ZNF101	NM_033204	ref|Homo sapiens zinc finger protein 101 (ZNF101), mRNA [NM_033204]	0.230809	0.397812	0.824005
ENST00000412730	ENST00000412730	gb|Homo sapiens hypothetical protein MGC16075, mRNA (cDNA clone MGC:16075 IMAGE:3616854), complete cds. [BC007354]	0.345535	0.319605	0.64936
PRDM1	NM_001198	ref|Homo sapiens PR domain containing 1, with ZNF domain (PRDM1), transcript variant 1, mRNA [NM_001198]	0.481843	0.689348	0.498865
SUCLG2	NM_003848	ref|Homo sapiens succinate-CoA ligase, GDP-forming, beta subunit (SUCLG2), nuclear gene encoding mitochondrial protein, transcript variant 2, mRNA [NM_003848]	0.00945284	-0.833149	-0.848849
HIST1H2AJ	NM_021066	ref|Homo sapiens histone cluster 1, H2aj (HIST1H2AJ), mRNA [NM_021066]	-0.519225	-0.508962	-1.04992
ROR1	NM_001083592	ref|Homo sapiens receptor tyrosine kinase-like orphan receptor 1 (ROR1), transcript variant 2, mRNA [NM_001083592]	0.0402884	-0.44331	-0.179576
TMCO7	NM_024562	ref|Homo sapiens transmembrane and coiled-coil domains 7 (TMCO7), mRNA [NM_024562]	-0.267395	-0.331616	-0.799914
ADCK1	NM_020421	ref|Homo sapiens aarF domain containing kinase 1 (ADCK1), transcript variant 1, mRNA [NM_020421]	-0.149158	-0.449983	-0.605013
HN1	NM_001002033	ref|Homo sapiens hematological and neurological expressed 1 (HN1), transcript variant 3, mRNA [NM_001002033]	0.23913	0.276858	0.681181
ROR1	NM_005012	ref|Homo sapiens receptor tyrosine kinase-like orphan receptor 1 (ROR1), transcript variant 1, mRNA [NM_005012]	-0.191519	-0.954073	-1.41111
CDC37L1	NM_017913	ref|Homo sapiens cell division cycle 37 homolog (S. cerevisiae)-like 1 (CDC37L1), mRNA [NM_017913]	0.291435	0.530406	0.831578
PSMD1	NM_002807	ref|Homo sapiens proteasome (prosome, macropain) 26S subunit, non-ATPase, 1 (PSMD1), transcript variant 1, mRNA [NM_002807]	-0.0832277	-0.408412	-0.486358
A_33_P3309684	A_33_P3309684	Unknown	0.207275	0.401655	0.572267
A_33_P3386723	A_33_P3386723	Unknown	0.03026	-0.472948	-0.841604
FANCA	NM_000135	ref|Homo sapiens Fanconi anemia, complementation group A (FANCA), transcript variant 1, mRNA [NM_000135]	-0.020339	0.404798	-0.0768053
EGFR	NM_005228	ref|Homo sapiens epidermal growth factor receptor (EGFR), transcript variant 1, mRNA [NM_005228]	0.232459	-0.380688	-0.442341
BLMH	NM_000386	ref|Homo sapiens bleomycin hydrolase (BLMH), mRNA [NM_000386]	-0.212257	-0.360838	-0.615556
METTL2B	NM_018396	ref|Homo sapiens methyltransferase like 2B (METTL2B), mRNA [NM_018396]	-0.233852	-0.369615	-0.741958
ZNF107	NM_016220	ref|Homo sapiens zinc finger protein 107 (ZNF107), transcript variant 1, mRNA [NM_016220]	0.211704	0.25836	0.524518
PARP12	NM_022750	ref|Homo sapiens poly (ADP-ribose) polymerase family, member 12 (PARP12), mRNA [NM_022750]	0.439695	0.268713	0.206597
TPM2	NM_213674	ref|Homo sapiens tropomyosin 2 (beta) (TPM2), transcript variant 2, mRNA [NM_213674]	1.29181	1.15029	1.85679
NUP98	NM_005387	ref|Homo sapiens nucleoporin 98kDa (NUP98), transcript variant 3, mRNA [NM_005387]	0.164965	-0.269295	0.0321134
POLR2F	NM_021974	ref|Homo sapiens polymerase (RNA) II (DNA directed) polypeptide F (POLR2F), mRNA [NM_021974]	-0.0794267	0.0428361	-0.0311519
KDM3A	NM_018433	ref|Homo sapiens lysine (K)-specific demethylase 3A (KDM3A), transcript variant 1, mRNA [NM_018433]	0.379257	0.531173	0.692547
PDGFA	NM_002607	ref|Homo sapiens platelet-derived growth factor alpha polypeptide (PDGFA), transcript variant 1, mRNA [NM_002607]	-0.15938	-0.409442	-0.413451
ENST00000377836	ENST00000377836	ens|hairy and enhancer of split 2 (Drosophila) [Source:HGNC Symbol;Acc:16005] [ENST00000377836]	0.727846	0.619476	0.835544
PSPC1	NM_001042414	ref|Homo sapiens paraspeckle component 1 (PSPC1), transcript variant alpha, mRNA [NM_001042414]	-0.204806	-0.24	-0.35955
RABL3	NM_173825	ref|Homo sapiens RAB, member of RAS oncogene family-like 3 (RABL3), mRNA [NM_173825]	-0.0997116	-0.338276	-0.640646
SBDS	NM_016038	ref|Homo sapiens Shwachman-Bodian-Diamond syndrome (SBDS), mRNA [NM_016038]	0.187858	0.230344	0.474847
PRKCD	NM_006254	ref|Homo sapiens protein kinase C, delta (PRKCD), transcript variant 1, mRNA [NM_006254]	0.17538	0.0813977	0.39407
ENST00000331733	ENST00000331733	ens|family with sequence similarity 187, member A [Source:HGNC Symbol;Acc:35153] [ENST00000331733]	0.147444	0.65542	0.815011
BRSK2	NM_003957	ref|Homo sapiens BR serine/threonine kinase 2 (BRSK2), mRNA [NM_003957]	-0.265715	-0.299474	-0.734018
SIAH1	NM_003031	ref|Homo sapiens seven in absentia homolog 1 (Drosophila) (SIAH1), transcript variant 1, mRNA [NM_003031]	0.155177	-0.0895214	0.365417
BCL2	NM_000633	ref|Homo sapiens B-cell CLL/lymphoma 2 (BCL2), nuclear gene encoding mitochondrial protein, transcript variant alpha, mRNA [NM_000633]	0.073743	-0.197968	-0.751518
SMARCB1	NM_003073	ref|Homo sapiens SWI/SNF related, matrix associated, actin dependent regulator of chromatin, subfamily b, member 1 (SMARCB1), transcript variant 1, mRNA [NM_003073]	-0.0140976	-0.298854	-0.357977
ASAP1	NM_018482	ref|Homo sapiens ArfGAP with SH3 domain, ankyrin repeat and PH domain 1 (ASAP1), mRNA [NM_018482]	-0.243473	-0.8279	-1.12463
NAIP	NM_004536	ref|Homo sapiens NLR family, apoptosis inhibitory protein (NAIP), transcript variant 1, mRNA [NM_004536]	-0.273178	-0.117004	-0.495753
LNX2	NM_153371	ref|Homo sapiens ligand of numb-protein X 2 (LNX2), mRNA [NM_153371]	0.332642	0.154219	0.482457
KRT8	NM_002273	ref|Homo sapiens keratin 8 (KRT8), mRNA [NM_002273]	-0.165101	-0.490648	-0.854931
CDK9	NM_001261	ref|Homo sapiens cyclin-dependent kinase 9 (CDK9), mRNA [NM_001261]	0.100995	0.168583	0.700883
BACH1	NM_206866	ref|Homo sapiens BTB and CNC homology 1, basic leucine zipper transcription factor 1 (BACH1), transcript variant 1, mRNA [NM_206866]	0.306603	0.560541	0.716231
ATP6V1C1	NM_001695	ref|Homo sapiens ATPase, H+ transporting, lysosomal 42kDa, V1 subunit C1 (ATP6V1C1), mRNA [NM_001695]	-0.0223847	0.440159	0.437316
TMCC3	NM_020698	ref|Homo sapiens transmembrane and coiled-coil domain family 3 (TMCC3), mRNA [NM_020698]	0.202051	0.313857	0.402038
ANKRD13A	NM_033121	ref|Homo sapiens ankyrin repeat domain 13A (ANKRD13A), mRNA [NM_033121]	0.316235	0.957294	1.37578
ZNF404	NM_001033719	ref|Homo sapiens zinc finger protein 404 (ZNF404), mRNA [NM_001033719]	0.344768	0.600778	0.878222
MAP3K4	NM_005922	ref|Homo sapiens mitogen-activated protein kinase kinase kinase 4 (MAP3K4), transcript variant 1, mRNA [NM_005922]	-0.321811	-1.10793	-1.2285
ENST00000445515	ENST00000445515	Unknown	0.181779	0.258472	0.626388
POLR1C	NM_004875	ref|Homo sapiens polymerase (RNA) I polypeptide C, 30kDa (POLR1C), transcript variant 2, mRNA [NM_004875]	0.289197	0.190352	0.479238
UPF2	NM_080599	ref|Homo sapiens UPF2 regulator of nonsense transcripts homolog (yeast) (UPF2), transcript variant 1, mRNA [NM_080599]	-0.0450909	0.0616686	-0.0681072
ARHGAP19	NM_032900	ref|Homo sapiens Rho GTPase activating protein 19 (ARHGAP19), mRNA [NM_032900]	-0.146665	-0.63561	-0.794125
CDK9	NM_001261	ref|Homo sapiens cyclin-dependent kinase 9 (CDK9), mRNA [NM_001261]	0.112546	0.176232	0.697301
RPS27	NM_001030	ref|Homo sapiens ribosomal protein S27 (RPS27), mRNA [NM_001030]	0.263827	0.67928	0.899274
EXOC1	NM_001024924	ref|Homo sapiens exocyst complex component 1 (EXOC1), transcript variant 3, mRNA [NM_001024924]	0.265777	0.547289	0.68063
RUNDC2A	NM_032167	ref|Homo sapiens RUN domain containing 2A (RUNDC2A), mRNA [NM_032167]	-0.358351	-0.131669	-0.376082
WDR73	NM_032856	ref|Homo sapiens WD repeat domain 73 (WDR73), mRNA [NM_032856]	0.054077	-0.108035	-0.0311805
TNXB	NM_019105	ref|Homo sapiens tenascin XB (TNXB), transcript variant XB, mRNA [NM_019105]	0.299273	0.886058	1.37831
HNRNPH2	NM_019597	ref|Homo sapiens heterogeneous nuclear ribonucleoprotein H2 (H') (HNRNPH2), transcript variant 1, mRNA [NM_019597]	0.307047	0.408508	0.687151
LIPA	NM_000235	ref|Homo sapiens lipase A, lysosomal acid, cholesterol esterase (LIPA), transcript variant 2, mRNA [NM_000235]	0.255592	1.09222	1.04426
AGRN	NM_198576	ref|Homo sapiens agrin (AGRN), mRNA [NM_198576]	-0.457224	-0.610998	-0.664793
RRP8	NM_015324	ref|Homo sapiens ribosomal RNA processing 8, methyltransferase, homolog (yeast) (RRP8), mRNA [NM_015324]	0.1737	0.167207	0.418397
RPAP3	NM_024604	ref|Homo sapiens RNA polymerase II associated protein 3 (RPAP3), transcript variant 1, mRNA [NM_024604]	0.299718	0.406293	0.650785
MRPL22	NM_001014990	ref|Homo sapiens mitochondrial ribosomal protein L22 (MRPL22), nuclear gene encoding mitochondrial protein, transcript variant 2, mRNA [NM_001014990]	-0.0624316	-0.28854	-0.505709
GANAB	NM_198335	ref|Homo sapiens glucosidase, alpha; neutral AB (GANAB), transcript variant 3, mRNA [NM_198335]	-0.306096	0.104741	-0.507594
ZFAND2A	NM_182491	ref|Homo sapiens zinc finger, AN1-type domain 2A (ZFAND2A), mRNA [NM_182491]	0.321604	0.506926	0.931483
HOXD3	NM_006898	ref|Homo sapiens homeobox D3 (HOXD3), mRNA [NM_006898]	0.372775	-0.109139	0.767944
A_24_P152356	A_24_P152356	Unknown	0.254713	0.281176	0.595743
AARSD1	NM_025267	ref|Homo sapiens alanyl-tRNA synthetase domain containing 1 (AARSD1), transcript variant 2, mRNA [NM_025267]	-0.192923	-0.261925	-0.624705
ZNF684	NM_152373	ref|Homo sapiens zinc finger protein 684 (ZNF684), mRNA [NM_152373]	0.28544	0.550891	1.00643
IQGAP2	NM_006633	ref|Homo sapiens IQ motif containing GTPase activating protein 2 (IQGAP2), mRNA [NM_006633]	-0.186458	-0.376676	-0.752641
ZMYM4	NM_005095	ref|Homo sapiens zinc finger, MYM-type 4 (ZMYM4), mRNA [NM_005095]	0.0215569	-0.242687	-0.504037
EXOC6	NM_019053	ref|Homo sapiens exocyst complex component 6 (EXOC6), transcript variant 1, mRNA [NM_019053]	-0.20765	-0.448248	-0.623975
RASA4	NM_001079877	ref|Homo sapiens RAS p21 protein activator 4 (RASA4), transcript variant 2, mRNA [NM_001079877]	0.198382	0.451858	0.401457
TM9SF3	NM_020123	ref|Homo sapiens transmembrane 9 superfamily member 3 (TM9SF3), mRNA [NM_020123]	0.291835	0.314023	0.45339
ZNF468	NM_199132	ref|Homo sapiens zinc finger protein 468 (ZNF468), transcript variant 1, mRNA [NM_199132]	0.279906	0.415854	0.894293
ZNF544	NM_014480	ref|Homo sapiens zinc finger protein 544 (ZNF544), mRNA [NM_014480]	-0.0966778	-0.416353	-0.507343
LASS6	NM_203463	ref|Homo sapiens LAG1 homolog, ceramide synthase 6 (LASS6), mRNA [NM_203463]	0.0927447	-0.327662	-0.252023
KDM4C	NM_015061	ref|Homo sapiens lysine (K)-specific demethylase 4C (KDM4C), transcript variant 1, mRNA [NM_015061]	-0.0767039	-0.580682	-0.872156
ACBD4	NM_024722	ref|Homo sapiens acyl-CoA binding domain containing 4 (ACBD4), transcript variant 2, mRNA [NM_024722]	-0.266582	-0.283375	-0.174396
COQ5	NM_032314	ref|Homo sapiens coenzyme Q5 homolog, methyltransferase (S. cerevisiae) (COQ5), nuclear gene encoding mitochondrial protein, mRNA [NM_032314]	-0.405052	-0.699934	-0.835932
VAPA	NM_003574	ref|Homo sapiens VAMP (vesicle-associated membrane protein)-associated protein A, 33kDa (VAPA), transcript variant 1, mRNA [NM_003574]	0.145742	-0.231016	-0.0584967
ICAM1	NM_000201	ref|Homo sapiens intercellular adhesion molecule 1 (ICAM1), mRNA [NM_000201]	0.154146	0.421206	0.365633
SMCR7L	NM_019008	ref|Homo sapiens Smith-Magenis syndrome chromosome region, candidate 7-like (SMCR7L), mRNA [NM_019008]	0.109985	0.25759	0.31552
PPP1CB	NM_002709	ref|Homo sapiens protein phosphatase 1, catalytic subunit, beta isozyme (PPP1CB), transcript variant 1, mRNA [NM_002709]	0.104682	-0.289528	-0.368128
POLR1D	NM_015972	ref|Homo sapiens polymerase (RNA) I polypeptide D, 16kDa (POLR1D), transcript variant 1, mRNA [NM_015972]	0.207494	0.488575	0.751816
MAP3K11	NM_002419	ref|Homo sapiens mitogen-activated protein kinase kinase kinase 11 (MAP3K11), mRNA [NM_002419]	-0.0429902	0.450436	0.777866
PPIL2	NM_148175	ref|Homo sapiens peptidylprolyl isomerase (cyclophilin)-like 2 (PPIL2), transcript variant 2, mRNA [NM_148175]	-0.249238	-0.197255	-0.423584
CAPN5	NM_004055	ref|Homo sapiens calpain 5 (CAPN5), mRNA [NM_004055]	0.0576439	0.960583	1.5308
USP13	NM_003940	ref|Homo sapiens ubiquitin specific peptidase 13 (isopeptidase T-3) (USP13), mRNA [NM_003940]	-0.343659	-0.438853	-0.840832
EIF2B1	NM_001414	ref|Homo sapiens eukaryotic translation initiation factor 2B, subunit 1 alpha, 26kDa (EIF2B1), mRNA [NM_001414]	0.104201	0.506533	0.648575
NF1P1	NR_028506	ref|Homo sapiens neurofibromin 1 pseudogene 1 (NF1P1), non-coding RNA [NR_028506]	-0.287781	-0.412868	-0.604928
TAF1D	NM_024116	ref|Homo sapiens TATA box binding protein (TBP)-associated factor, RNA polymerase I, D, 41kDa (TAF1D), mRNA [NM_024116]	0.164068	0.326073	0.505683
TBC1D1	NM_015173	ref|Homo sapiens TBC1 (tre-2/USP6, BUB2, cdc16) domain family, member 1 (TBC1D1), mRNA [NM_015173]	-0.21265	-0.256926	-0.643858
SMCR7L	NM_019008	ref|Homo sapiens Smith-Magenis syndrome chromosome region, candidate 7-like (SMCR7L), mRNA [NM_019008]	0.0965707	0.214932	0.386373
C1orf122	NM_198446	ref|Homo sapiens chromosome 1 open reading frame 122 (C1orf122), transcript variant 1, mRNA [NM_198446]	0.0862289	0.415224	0.668452
SMCR7L	NM_019008	ref|Homo sapiens Smith-Magenis syndrome chromosome region, candidate 7-like (SMCR7L), mRNA [NM_019008]	0.0961815	0.246058	0.456714
MBP	NM_001025100	ref|Homo sapiens myelin basic protein (MBP), transcript variant 8, mRNA [NM_001025100]	-0.326977	-0.579281	-0.812622
SNRPF	NM_003095	ref|Homo sapiens small nuclear ribonucleoprotein polypeptide F (SNRPF), mRNA [NM_003095]	-0.137743	-0.405225	-0.602481
RPS29	NM_001032	ref|Homo sapiens ribosomal protein S29 (RPS29), transcript variant 1, mRNA [NM_001032]	0.208273	0.575038	0.790738
A_33_P3328837	A_33_P3328837	Unknown	0.231524	0.413019	0.764912
MYD88	NM_002468	ref|Homo sapiens myeloid differentiation primary response gene (88) (MYD88), transcript variant 2, mRNA [NM_002468]	0.0512367	0.108758	0.410099
INCENP	NM_001040694	ref|Homo sapiens inner centromere protein antigens 135/155kDa (INCENP), transcript variant 1, mRNA [NM_001040694]	0.118074	0.628977	0.733474
EIF2C3	NM_024852	ref|Homo sapiens eukaryotic translation initiation factor 2C, 3 (EIF2C3), transcript variant 1, mRNA [NM_024852]	0.0744658	0.205364	0.335418
ZNF234	NM_006630	ref|Homo sapiens zinc finger protein 234 (ZNF234), transcript variant 1, mRNA [NM_006630]	0.166535	1.12904	1.48081
HIST1H2AK	NM_003510	ref|Homo sapiens histone cluster 1, H2ak (HIST1H2AK), mRNA [NM_003510]	-0.565431	-0.492798	-0.922944
HSP90AA1	NM_001017963	ref|Homo sapiens heat shock protein 90kDa alpha (cytosolic), class A member 1 (HSP90AA1), transcript variant 1, mRNA [NM_001017963]	0.203415	-0.207521	-0.0876288
UBIAD1	NM_013319	ref|Homo sapiens UbiA prenyltransferase domain containing 1 (UBIAD1), mRNA [NM_013319]	0.0308482	-0.106946	0.14002
TBCA	NM_004607	ref|Homo sapiens tubulin folding cofactor A (TBCA), mRNA [NM_004607]	-0.0919925	-0.605045	-0.82346
AARS2	NM_020745	ref|Homo sapiens alanyl-tRNA synthetase 2, mitochondrial (putative) (AARS2), nuclear gene encoding mitochondrial protein, mRNA [NM_020745]	0.205731	0.0380036	0.318722
C3orf75	NM_001031703	ref|Homo sapiens chromosome 3 open reading frame 75 (C3orf75), mRNA [NM_001031703]	-0.205942	-0.118671	-0.288396
BMS1	NM_014753	ref|Homo sapiens BMS1 homolog, ribosome assembly protein (yeast) (BMS1), mRNA [NM_014753]	-0.0122796	-0.288542	-0.241999
PAFAH1B1	NM_000430	ref|Homo sapiens platelet-activating factor acetylhydrolase 1b, regulatory subunit 1 (45kDa) (PAFAH1B1), mRNA [NM_000430]	-0.123123	-0.345705	-0.596914
GINS2	NM_016095	ref|Homo sapiens GINS complex subunit 2 (Psf2 homolog) (GINS2), mRNA [NM_016095]	-0.188511	-0.478727	-0.608902
UQCRH	NM_006004	ref|Homo sapiens ubiquinol-cytochrome c reductase hinge protein (UQCRH), nuclear gene encoding mitochondrial protein, mRNA [NM_006004]	0.0692213	0.356911	0.438104
TNXB	NM_019105	ref|Homo sapiens tenascin XB (TNXB), transcript variant XB, mRNA [NM_019105]	-0.0992606	-0.0728741	-0.0147692
HNRNPH2	NM_019597	ref|Homo sapiens heterogeneous nuclear ribonucleoprotein H2 (H') (HNRNPH2), transcript variant 1, mRNA [NM_019597]	0.319309	0.437605	0.667341
SENP6	NM_015571	ref|Homo sapiens SUMO1/sentrin specific peptidase 6 (SENP6), transcript variant 1, mRNA [NM_015571]	0.0769524	-0.424502	-0.69228
SLC44A1	NM_080546	ref|Homo sapiens solute carrier family 44, member 1 (SLC44A1), mRNA [NM_080546]	-0.472244	-0.460012	-1.19726
DDX4	NM_024415	ref|Homo sapiens DEAD (Asp-Glu-Ala-Asp) box polypeptide 4 (DDX4), transcript variant 1, mRNA [NM_024415]	0.844115	0.93221	2.23871
SMCR7L	NM_019008	ref|Homo sapiens Smith-Magenis syndrome chromosome region, candidate 7-like (SMCR7L), mRNA [NM_019008]	0.0589276	0.203912	0.493105
THADA	NM_001083953	ref|Homo sapiens thyroid adenoma associated (THADA), transcript variant 3, mRNA [NM_001083953]	0.0625718	-0.184887	-0.262542
ZNF615	NM_001199324	ref|Homo sapiens zinc finger protein 615 (ZNF615), transcript variant 1, mRNA [NM_001199324]	0.349194	0.589076	0.643752
ZBTB46	NM_025224	ref|Homo sapiens zinc finger and BTB domain containing 46 (ZBTB46), mRNA [NM_025224]	-0.637191	-0.223375	-0.902933
MRPL22	NM_001014990	ref|Homo sapiens mitochondrial ribosomal protein L22 (MRPL22), nuclear gene encoding mitochondrial protein, transcript variant 2, mRNA [NM_001014990]	-0.0694173	-0.283405	-0.526667
KLHL28	NM_017658	ref|Homo sapiens kelch-like 28 (Drosophila) (KLHL28), mRNA [NM_017658]	0.204053	0.565342	0.82338
MANBAL	NM_022077	ref|Homo sapiens mannosidase, beta A, lysosomal-like (MANBAL), transcript variant 1, mRNA [NM_022077]	-0.018105	-0.310214	-0.47196
SNRPF	NM_003095	ref|Homo sapiens small nuclear ribonucleoprotein polypeptide F (SNRPF), mRNA [NM_003095]	-0.155919	-0.39899	-0.584404
RPS29	NM_001032	ref|Homo sapiens ribosomal protein S29 (RPS29), transcript variant 1, mRNA [NM_001032]	0.251305	0.60351	0.805594
PPP2R3A	NM_002718	ref|Homo sapiens protein phosphatase 2, regulatory subunit B'', alpha (PPP2R3A), transcript variant 1, mRNA [NM_002718]	-0.13824	-0.398732	-0.734517
TRAFD1	NM_001143906	ref|Homo sapiens TRAF-type zinc finger domain containing 1 (TRAFD1), transcript variant 1, mRNA [NM_001143906]	0.000619807	0.375506	0.522415
BAX	NM_138764	ref|Homo sapiens BCL2-associated X protein (BAX), transcript variant sigma, mRNA [NM_138764]	-0.369251	-0.152088	-0.639425
ENST00000420143	ENST00000420143	ref|PREDICTED: Homo sapiens FLJ46358 protein (FLJ46358), mRNA [XM_001715330]	-0.123364	-0.0578918	1.16185
SNRNP27	NM_006857	ref|Homo sapiens small nuclear ribonucleoprotein 27kDa (U4/U6.U5) (SNRNP27), mRNA [NM_006857]	0.205642	0.256614	0.635189
MAST2	NM_015112	ref|Homo sapiens microtubule associated serine/threonine kinase 2 (MAST2), mRNA [NM_015112]	-0.169422	0.0144392	-0.22698
SMCR7L	NM_019008	ref|Homo sapiens Smith-Magenis syndrome chromosome region, candidate 7-like (SMCR7L), mRNA [NM_019008]	0.0870367	0.294768	0.465175
A_33_P3325011	A_33_P3325011	Unknown	0.109761	0.421354	0.602616
ENST00000468376	ENST00000468376	gb|Homo sapiens mRNA; cDNA DKFZp564P1772 (from clone DKFZp564P1772). [AL137703]	-0.523429	-0.194986	-0.548652
CLEC2D	NM_013269	ref|Homo sapiens C-type lectin domain family 2, member D (CLEC2D), transcript variant 1, mRNA [NM_013269]	0.161408	0.719434	0.211335
METTL7A	NM_014033	ref|Homo sapiens methyltransferase like 7A (METTL7A), mRNA [NM_014033]	1.20039	2.44128	2.60893
REEP5	NM_005669	ref|Homo sapiens receptor accessory protein 5 (REEP5), mRNA [NM_005669]	-0.126309	0.12437	-0.447165
VMA21	NM_001017980	ref|Homo sapiens VMA21 vacuolar H+-ATPase homolog (S. cerevisiae) (VMA21), mRNA [NM_001017980]	0.0705303	-0.080335	-0.0513393
CHRNA10	NM_020402	ref|Homo sapiens cholinergic receptor, nicotinic, alpha 10 (CHRNA10), mRNA [NM_020402]	-0.353568	-0.439075	-0.558634
RNF130	NM_018434	ref|Homo sapiens ring finger protein 130 (RNF130), mRNA [NM_018434]	-0.371831	0.0799963	-0.037108
PARP12	NM_022750	ref|Homo sapiens poly (ADP-ribose) polymerase family, member 12 (PARP12), mRNA [NM_022750]	0.421964	0.177288	0.307484
FHL2	ENST00000409177	ens|four and a half LIM domains 2 [Source:HGNC Symbol;Acc:3703] [ENST00000409177]	-0.347188	-0.620631	-0.709425
MRPS16	NM_016065	ref|Homo sapiens mitochondrial ribosomal protein S16 (MRPS16), nuclear gene encoding mitochondrial protein, mRNA [NM_016065]	-0.0960046	-0.336886	-0.820868
APPBP2	NM_006380	ref|Homo sapiens amyloid beta precursor protein (cytoplasmic tail) binding protein 2 (APPBP2), mRNA [NM_006380]	-0.399483	-0.274313	-0.738614
ACP5	NM_001611	ref|Homo sapiens acid phosphatase 5, tartrate resistant (ACP5), transcript variant 4, mRNA [NM_001611]	0.683528	0.0981554	1.52215
MINA	NM_032778	ref|Homo sapiens MYC induced nuclear antigen (MINA), transcript variant 3, mRNA [NM_032778]	0.145852	-0.41458	-0.346865
PCBP2	NM_005016	ref|Homo sapiens poly(rC) binding protein 2 (PCBP2), transcript variant 1, mRNA [NM_005016]	0.031862	-0.501249	-0.805809
SLC25A30	NM_001010875	ref|Homo sapiens solute carrier family 25, member 30 (SLC25A30), nuclear gene encoding mitochondrial protein, mRNA [NM_001010875]	0.274584	-0.0428015	0.675907
CTH	NM_001902	ref|Homo sapiens cystathionase (cystathionine gamma-lyase) (CTH), transcript variant 1, mRNA [NM_001902]	0.57653	0.616267	0.83851
RRN3	NM_018427	ref|Homo sapiens RRN3 RNA polymerase I transcription factor homolog (S. cerevisiae) (RRN3), mRNA [NM_018427]	0.0861601	0.38883	0.555174
ZBTB46	ENST00000245663	ens|zinc finger and BTB domain containing 46 [Source:HGNC Symbol;Acc:16094] [ENST00000245663]	-0.635057	0.0190822	-0.660923
BIVM	NM_017693	ref|Homo sapiens basic, immunoglobulin-like variable motif containing (BIVM), transcript variant 1, mRNA [NM_017693]	-0.123383	-0.0283044	-0.528911
MAPKSP1	NM_021970	ref|Homo sapiens MAPK scaffold protein 1 (MAPKSP1), transcript variant 1, mRNA [NM_021970]	0.295827	0.206171	0.904773
NCAPH2	NM_001185011	ref|Homo sapiens non-SMC condensin II complex, subunit H2 (NCAPH2), transcript variant 3, mRNA [NM_001185011]	-0.0412724	-0.195198	-0.213414
MSH3	NM_002439	ref|Homo sapiens mutS homolog 3 (E. coli) (MSH3), mRNA [NM_002439]	-0.19709	-0.580605	-0.601775
GAPDH	NM_002046	ref|Homo sapiens glyceraldehyde-3-phosphate dehydrogenase (GAPDH), mRNA [NM_002046]	-0.150566	-0.219082	-0.593749
YY1	NM_003403	ref|Homo sapiens YY1 transcription factor (YY1), mRNA [NM_003403]	0.246057	0.29189	0.684599
SPTY2D1	NM_194285	ref|Homo sapiens SPT2, Suppressor of Ty, domain containing 1 (S. cerevisiae) (SPTY2D1), mRNA [NM_194285]	0.341798	0.430822	0.651995
NDE1	NM_017668	ref|Homo sapiens nudE nuclear distribution gene E homolog 1 (A. nidulans) (NDE1), transcript variant 2, mRNA [NM_017668]	-0.352571	-0.205089	-0.529542
TUBGCP2	NM_006659	ref|Homo sapiens tubulin, gamma complex associated protein 2 (TUBGCP2), mRNA [NM_006659]	-0.265529	-0.589944	-0.92144
CCNY	NM_145012	ref|Homo sapiens cyclin Y (CCNY), transcript variant 1, mRNA [NM_145012]	-0.158682	-0.600386	-1.01366
ENST00000370094	ENST00000370094	ens|meningioma expressed antigen 5 (hyaluronidase) [Source:HGNC Symbol;Acc:7056] [ENST00000370094]	0.15758	0.69019	0.805436
ANKRD36	NM_001164315	ref|Homo sapiens ankyrin repeat domain 36 (ANKRD36), mRNA [NM_001164315]	0.0131958	0.104255	-0.0400305
EDARADD	NM_080738	ref|Homo sapiens EDAR-associated death domain (EDARADD), transcript variant B, mRNA [NM_080738]	-0.23745	-0.737492	-1.05243
CCNK	NM_001099402	ref|Homo sapiens cyclin K (CCNK), mRNA [NM_001099402]	0.296275	0.245597	0.380176
HNRNPH2	NM_019597	ref|Homo sapiens heterogeneous nuclear ribonucleoprotein H2 (H') (HNRNPH2), transcript variant 1, mRNA [NM_019597]	0.332334	0.366884	0.661173
ATIC	NM_004044	ref|Homo sapiens 5-aminoimidazole-4-carboxamide ribonucleotide formyltransferase/IMP cyclohydrolase (ATIC), mRNA [NM_004044]	0.0182225	-0.269115	-0.447962
MAPKAPK2	NM_004759	ref|Homo sapiens mitogen-activated protein kinase-activated protein kinase 2 (MAPKAPK2), transcript variant 1, mRNA [NM_004759]	-0.0414369	-0.447983	-0.508191
EPB41L1	NM_012156	ref|Homo sapiens erythrocyte membrane protein band 4.1-like 1 (EPB41L1), transcript variant 1, mRNA [NM_012156]	0.0435066	-0.0785739	-0.292546
CYFIP2	NM_001037332	ref|Homo sapiens cytoplasmic FMR1 interacting protein 2 (CYFIP2), transcript variant 2, mRNA [NM_001037332]	-0.206027	-0.201301	-0.531334
PDXK	NM_003681	ref|Homo sapiens pyridoxal (pyridoxine, vitamin B6) kinase (PDXK), mRNA [NM_003681]	-0.197483	-0.0804117	-0.69981
ZNF259	NM_003904	ref|Homo sapiens zinc finger protein 259 (ZNF259), mRNA [NM_003904]	0.319973	0.332622	0.780472
CETP	NM_000078	ref|Homo sapiens cholesteryl ester transfer protein, plasma (CETP), mRNA [NM_000078]	0.796867	0.545141	1.06772
ACOX2	NM_003500	ref|Homo sapiens acyl-CoA oxidase 2, branched chain (ACOX2), mRNA [NM_003500]	0.708217	1.0075	1.43605
NPM1	NM_002520	ref|Homo sapiens nucleophosmin (nucleolar phosphoprotein B23, numatrin) (NPM1), transcript variant 1, mRNA [NM_002520]	0.175579	-0.260884	-0.589848
PLEKHB2	NM_017958	ref|Homo sapiens pleckstrin homology domain containing, family B (evectins) member 2 (PLEKHB2), transcript variant 2, mRNA [NM_017958]	-0.0944115	-0.10981	0.0217001
MAPKSP1	NM_021970	ref|Homo sapiens MAPK scaffold protein 1 (MAPKSP1), transcript variant 1, mRNA [NM_021970]	0.32817	0.273134	0.92646
CDK9	NM_001261	ref|Homo sapiens cyclin-dependent kinase 9 (CDK9), mRNA [NM_001261]	0.0582404	0.227696	0.694298
TNXB	NM_019105	ref|Homo sapiens tenascin XB (TNXB), transcript variant XB, mRNA [NM_019105]	0.215374	0.176717	0.768536
TMED10	NM_006827	ref|Homo sapiens transmembrane emp24-like trafficking protein 10 (yeast) (TMED10), mRNA [NM_006827]	-0.106907	-0.123047	-0.47263
BRD2	NM_005104	ref|Homo sapiens bromodomain containing 2 (BRD2), transcript variant 1, mRNA [NM_005104]	0.13669	0.0520136	0.558245
ZFAND3	NM_021943	ref|Homo sapiens zinc finger, AN1-type domain 3 (ZFAND3), mRNA [NM_021943]	-0.201403	-0.836055	-1.0286
APEH	NM_001640	ref|Homo sapiens N-acylaminoacyl-peptide hydrolase (APEH), mRNA [NM_001640]	-0.202092	-0.274231	-0.513358
CCDC88B	NM_032251	ref|Homo sapiens coiled-coil domain containing 88B (CCDC88B), mRNA [NM_032251]	0.39253	0.672773	0.567627
MAX	NM_145114	ref|Homo sapiens MYC associated factor X (MAX), transcript variant 4, mRNA [NM_145114]	0.299727	0.485367	0.703818
PAFAH1B1	NM_000430	ref|Homo sapiens platelet-activating factor acetylhydrolase 1b, regulatory subunit 1 (45kDa) (PAFAH1B1), mRNA [NM_000430]	-0.144727	-0.376832	-0.580697
PSMC3IP	NM_013290	ref|Homo sapiens PSMC3 interacting protein (PSMC3IP), transcript variant 1, mRNA [NM_013290]	0.267741	0.536635	0.872798
ARMCX5	NM_022838	ref|Homo sapiens armadillo repeat containing, X-linked 5 (ARMCX5), transcript variant 2, mRNA [NM_022838]	0.397117	-0.026428	0.55704
SDCCAG8	NM_006642	ref|Homo sapiens serologically defined colon cancer antigen 8 (SDCCAG8), mRNA [NM_006642]	-0.10401	0.109081	-0.23221
ENOX1	NM_017993	ref|Homo sapiens ecto-NOX disulfide-thiol exchanger 1 (ENOX1), transcript variant 1, mRNA [NM_017993]	-0.267038	-0.733819	-0.833134
PMS2L2	NR_003614	ref|Homo sapiens postmeiotic segregation increased 2-like 2 pseudogene (PMS2L2), non-coding RNA [NR_003614]	-0.172461	0.390633	0.52414
CTPS2	NM_175859	ref|Homo sapiens CTP synthase II (CTPS2), transcript variant 2, mRNA [NM_175859]	-0.256374	-0.621766	-0.892152
DHX16	NM_003587	ref|Homo sapiens DEAH (Asp-Glu-Ala-His) box polypeptide 16 (DHX16), transcript variant 1, mRNA [NM_003587]	0.0660368	-0.273041	-0.465987
LOC256374	XM_001717840	ref|PREDICTED: Homo sapiens peptidyl-prolyl cis-trans isomerase A-like (LOC256374), mRNA [XM_001717840]	-0.0972853	-0.297093	-0.459467
SMCR7L	NM_019008	ref|Homo sapiens Smith-Magenis syndrome chromosome region, candidate 7-like (SMCR7L), mRNA [NM_019008]	0.077357	0.168531	0.323043
JOSD1	NM_014876	ref|Homo sapiens Josephin domain containing 1 (JOSD1), mRNA [NM_014876]	0.27698	0.39209	0.541387
PARP12	NM_022750	ref|Homo sapiens poly (ADP-ribose) polymerase family, member 12 (PARP12), mRNA [NM_022750]	0.394799	0.146904	0.232092
HSPG2	NM_005529	ref|Homo sapiens heparan sulfate proteoglycan 2 (HSPG2), mRNA [NM_005529]	-0.606988	-1.03119	-1.35337
REPIN1	NM_014374	ref|Homo sapiens replication initiator 1 (REPIN1), transcript variant 2, mRNA [NM_014374]	-0.237848	-0.357159	-0.85456
FAM193A	NM_003704	ref|Homo sapiens family with sequence similarity 193, member A (FAM193A), mRNA [NM_003704]	-0.324588	-0.224475	-0.607596
NRP2	NM_201264	ref|Homo sapiens neuropilin 2 (NRP2), transcript variant 6, mRNA [NM_201264]	0.490401	0.271283	0.331945
ATG7	NM_006395	ref|Homo sapiens ATG7 autophagy related 7 homolog (S. cerevisiae) (ATG7), transcript variant 1, mRNA [NM_006395]	-0.159464	-0.245213	-0.546026
CDK5RAP1	NM_016082	ref|Homo sapiens CDK5 regulatory subunit associated protein 1 (CDK5RAP1), transcript variant 2, mRNA [NM_016082]	-0.231565	-0.375405	-0.691604
DLL4	NM_019074	ref|Homo sapiens delta-like 4 (Drosophila) (DLL4), mRNA [NM_019074]	-0.139419	1.04775	1.22054
CLASP2	NM_015097	ref|Homo sapiens cytoplasmic linker associated protein 2 (CLASP2), mRNA [NM_015097]	-0.00434262	-0.493476	-0.547965
SLC35E1	NM_024881	ref|Homo sapiens solute carrier family 35, member E1 (SLC35E1), mRNA [NM_024881]	0.145196	0.473211	0.71307
TMX3	NM_019022	ref|Homo sapiens thioredoxin-related transmembrane protein 3 (TMX3), mRNA [NM_019022]	-0.161607	-0.129418	-0.501464
SIPA1L1	NM_015556	ref|Homo sapiens signal-induced proliferation-associated 1 like 1 (SIPA1L1), mRNA [NM_015556]	-0.0733334	-0.717024	-1.19536
ZNF561	NM_152289	ref|Homo sapiens zinc finger protein 561 (ZNF561), mRNA [NM_152289]	0.0597875	-0.0835395	0.285956
UNC13B	NM_006377	ref|Homo sapiens unc-13 homolog B (C. elegans) (UNC13B), mRNA [NM_006377]	-0.0995797	-0.306703	-0.37222
MSH3	NM_002439	ref|Homo sapiens mutS homolog 3 (E. coli) (MSH3), mRNA [NM_002439]	-0.140423	-0.544364	-0.5567
TMEM85	NM_016454	ref|Homo sapiens transmembrane protein 85 (TMEM85), mRNA [NM_016454]	0.0343883	0.128538	0.383528
HNRNPH2	NM_019597	ref|Homo sapiens heterogeneous nuclear ribonucleoprotein H2 (H') (HNRNPH2), transcript variant 1, mRNA [NM_019597]	0.366252	0.438696	0.676355
PHF14	NM_014660	ref|Homo sapiens PHD finger protein 14 (PHF14), transcript variant 2, mRNA [NM_014660]	0.0405329	-0.0977644	-0.219004
SNRPD1	NM_006938	ref|Homo sapiens small nuclear ribonucleoprotein D1 polypeptide 16kDa (SNRPD1), mRNA [NM_006938]	-0.0388872	-0.368175	-0.391719
CTCF	NM_006565	ref|Homo sapiens CCCTC-binding factor (zinc finger protein) (CTCF), transcript variant 1, mRNA [NM_006565]	-0.191189	-0.29904	-0.38186
SNRPD1	NM_006938	ref|Homo sapiens small nuclear ribonucleoprotein D1 polypeptide 16kDa (SNRPD1), mRNA [NM_006938]	-0.0328723	-0.360613	-0.391242
LOC100131801	NM_001171155	ref|Homo sapiens hypothetical protein LOC100131801 (LOC100131801), transcript variant 1, mRNA [NM_001171155]	0.113458	0.484278	0.712395
IKZF5	NM_022466	ref|Homo sapiens IKAROS family zinc finger 5 (Pegasus) (IKZF5), mRNA [NM_022466]	0.307061	0.423395	0.910367
THADA	NM_022065	ref|Homo sapiens thyroid adenoma associated (THADA), transcript variant 1, mRNA [NM_022065]	-0.259385	-0.544637	-0.91481
ZNF738	NR_027130	ref|Homo sapiens zinc finger protein 738 (ZNF738), non-coding RNA [NR_027130]	0.177111	0.343246	0.53578
NPM1	NM_001037738	ref|Homo sapiens nucleophosmin (nucleolar phosphoprotein B23, numatrin) (NPM1), transcript variant 3, mRNA [NM_001037738]	0.0143977	-0.329116	-0.440922
ZNF436	NM_001077195	ref|Homo sapiens zinc finger protein 436 (ZNF436), transcript variant 1, mRNA [NM_001077195]	0.186541	0.587013	0.799639
PTPN11	NM_002834	ref|Homo sapiens protein tyrosine phosphatase, non-receptor type 11 (PTPN11), mRNA [NM_002834]	0.137917	0.113422	0.117442
INCENP	NM_001040694	ref|Homo sapiens inner centromere protein antigens 135/155kDa (INCENP), transcript variant 1, mRNA [NM_001040694]	0.103201	0.580075	0.781532
FKTN	NM_001079802	ref|Homo sapiens fukutin (FKTN), transcript variant 1, mRNA [NM_001079802]	-0.135376	-0.178327	-0.448972
PARP12	NM_022750	ref|Homo sapiens poly (ADP-ribose) polymerase family, member 12 (PARP12), mRNA [NM_022750]	0.458601	0.192375	0.32118
HMBS	NM_000190	ref|Homo sapiens hydroxymethylbilane synthase (HMBS), transcript variant 1, mRNA [NM_000190]	-0.265301	-0.569809	-0.801842
ENST00000376040	ENST00000376040	ens|N(alpha)-acetyltransferase 35, NatC auxiliary subunit [Source:HGNC Symbol;Acc:24340] [ENST00000376040]	0.264575	0.410493	0.872249
CDK9	NM_001261	ref|Homo sapiens cyclin-dependent kinase 9 (CDK9), mRNA [NM_001261]	0.0746487	0.199171	0.709009
LOC144438	NR_024266	ref|Homo sapiens hypothetical LOC144438 (LOC144438), non-coding RNA [NR_024266]	0.308012	0.675402	0.761358
DBR1	NM_016216	ref|Homo sapiens debranching enzyme homolog 1 (S. cerevisiae) (DBR1), mRNA [NM_016216]	0.465632	0.435534	0.984805
VIPAR	NM_022067	ref|Homo sapiens VPS33B interacting protein, apical-basolateral polarity regulator (VIPAR), transcript variant 2, mRNA [NM_022067]	0.197255	0.293035	0.489679
RPS2P32	NR_026676	ref|Homo sapiens ribosomal protein S2 pseudogene 32 (RPS2P32), non-coding RNA [NR_026676]	0.00896638	-0.152968	-0.237912
NT5C2	NM_012229	ref|Homo sapiens 5'-nucleotidase, cytosolic II (NT5C2), transcript variant 1, mRNA [NM_012229]	-0.150718	-0.252763	-0.492552
ABTB1	NM_172027	ref|Homo sapiens ankyrin repeat and BTB (POZ) domain containing 1 (ABTB1), transcript variant 2, mRNA [NM_172027]	0.130917	0.511834	0.928698
KIAA1683	NM_025249	ref|Homo sapiens KIAA1683 (KIAA1683), transcript variant 2, mRNA [NM_025249]	-0.0136151	0.142657	0.804988
ZNF720	NM_001130913	ref|Homo sapiens zinc finger protein 720 (ZNF720), mRNA [NM_001130913]	0.285479	0.424459	0.783525
AMMECR1L	NM_031445	ref|Homo sapiens AMME chromosomal region gene 1-like (AMMECR1L), transcript variant 1, mRNA [NM_031445]	0.015082	0.195607	0.407172
TRIM35	NM_171982	ref|Homo sapiens tripartite motif-containing 35 (TRIM35), transcript variant 2, mRNA [NM_171982]	0.174822	0.315616	0.589914
MED22	NM_133640	ref|Homo sapiens mediator complex subunit 22 (MED22), transcript variant b, mRNA [NM_133640]	-0.107285	-0.323374	-0.702356
COG1	NM_018714	ref|Homo sapiens component of oligomeric golgi complex 1 (COG1), mRNA [NM_018714]	0.349925	0.420108	0.784294
CDK11B	NM_033487	ref|Homo sapiens cyclin-dependent kinase 11B (CDK11B), transcript variant 3, mRNA [NM_033487]	-0.0600507	0.339353	0.36346
LPCAT1	NM_024830	ref|Homo sapiens lysophosphatidylcholine acyltransferase 1 (LPCAT1), mRNA [NM_024830]	-0.301888	-0.608354	-0.761987
LEAP2	NM_052971	ref|Homo sapiens liver expressed antimicrobial peptide 2 (LEAP2), mRNA [NM_052971]	0.920673	0.328354	0.965888
FAM193A	NM_003704	ref|Homo sapiens family with sequence similarity 193, member A (FAM193A), mRNA [NM_003704]	-0.273347	-0.256357	-0.562052
A_24_P126691	A_24_P126691	Unknown	-0.240378	-0.247987	-0.589806
ZNF627	NM_145295	ref|Homo sapiens zinc finger protein 627 (ZNF627), mRNA [NM_145295]	0.140765	0.751015	0.970533
RPL21	NM_000982	ref|Homo sapiens ribosomal protein L21 (RPL21), mRNA [NM_000982]	0.0621085	0.0873643	0.248496
CCDC99	NM_017785	ref|Homo sapiens coiled-coil domain containing 99 (CCDC99), mRNA [NM_017785]	0.196769	0.393041	0.688396
CD74	NM_001025158	ref|Homo sapiens CD74 molecule, major histocompatibility complex, class II invariant chain (CD74), transcript variant 3, mRNA [NM_001025158]	1.17304	1.03257	1.91453
PPP1R12A	NM_002480	ref|Homo sapiens protein phosphatase 1, regulatory (inhibitor) subunit 12A (PPP1R12A), transcript variant 1, mRNA [NM_002480]	0.0356964	-0.346178	-0.439971
EAF1	NM_033083	ref|Homo sapiens ELL associated factor 1 (EAF1), mRNA [NM_033083]	0.361652	0.446621	0.64241
ENST00000390465	ENST00000390465	gb|Homo sapiens TCRAV14.1a mRNA for T-cell receptor alpha-chain V region, partial cds. [D13074]	-0.05475	-0.107014	-0.726183
ENST00000486633	ENST00000486633	Unknown	0.0802824	-0.401764	-0.495305
UBXN2B	NM_001077619	ref|Homo sapiens UBX domain protein 2B (UBXN2B), mRNA [NM_001077619]	-0.218832	-0.526391	-0.541031
AARSD1	NM_025267	ref|Homo sapiens alanyl-tRNA synthetase domain containing 1 (AARSD1), transcript variant 2, mRNA [NM_025267]	-0.145616	-0.309939	-0.588415
INPP5A	NM_005539	ref|Homo sapiens inositol polyphosphate-5-phosphatase, 40kDa (INPP5A), mRNA [NM_005539]	-0.502237	-1.00337	-1.37659
NUMBL	NM_004756	ref|Homo sapiens numb homolog (Drosophila)-like (NUMBL), mRNA [NM_004756]	0.572498	0.116041	0.586611
DCUN1D5	NM_032299	ref|Homo sapiens DCN1, defective in cullin neddylation 1, domain containing 5 (S. cerevisiae) (DCUN1D5), mRNA [NM_032299]	0.0697592	-0.395042	-0.479936
FXC1	NM_012192	ref|Homo sapiens fracture callus 1 homolog (rat) (FXC1), nuclear gene encoding mitochondrial protein, mRNA [NM_012192]	0.285653	0.506938	0.693967
ATF2	NM_001880	ref|Homo sapiens activating transcription factor 2 (ATF2), mRNA [NM_001880]	0.073961	0.0863736	0.0806404
CHMP4C	NM_152284	ref|Homo sapiens chromatin modifying protein 4C (CHMP4C), mRNA [NM_152284]	0.231826	0.476383	0.545799
LRP5	NM_002335	ref|Homo sapiens low density lipoprotein receptor-related protein 5 (LRP5), mRNA [NM_002335]	-0.364628	-0.0585861	-0.702652
DISC1	NM_001012959	ref|Homo sapiens disrupted in schizophrenia 1 (DISC1), transcript variant S, mRNA [NM_001012959]	-0.245651	0.0203609	-0.372216
WDR73	NM_032856	ref|Homo sapiens WD repeat domain 73 (WDR73), mRNA [NM_032856]	0.164437	0.138893	0.349575
ZNHIT3	NM_004773	ref|Homo sapiens zinc finger, HIT-type containing 3 (ZNHIT3), mRNA [NM_004773]	0.0973247	0.364216	0.844914
A_24_P366535	A_24_P366535	Unknown	-0.259888	-0.585214	-0.781332
CAPG	NM_001747	ref|Homo sapiens capping protein (actin filament), gelsolin-like (CAPG), mRNA [NM_001747]	0.56262	0.814128	1.00355
CCDC136	NM_022742	ref|Homo sapiens coiled-coil domain containing 136 (CCDC136), mRNA [NM_022742]	0.393258	0.627611	0.960558
KRT8	NM_002273	ref|Homo sapiens keratin 8 (KRT8), mRNA [NM_002273]	-0.0710686	-0.25726	-0.451899
APH1A	NM_016022	ref|Homo sapiens anterior pharynx defective 1 homolog A (C. elegans) (APH1A), transcript variant 2, mRNA [NM_016022]	-0.719054	-0.526235	-1.24161
SETDB1	NM_012432	ref|Homo sapiens SET domain, bifurcated 1 (SETDB1), transcript variant 2, mRNA [NM_012432]	-0.0286719	0.303673	0.0921916
C6orf62	NM_030939	ref|Homo sapiens chromosome 6 open reading frame 62 (C6orf62), mRNA [NM_030939]	0.161542	0.330922	0.824972
C12orf62	NM_032901	ref|Homo sapiens chromosome 12 open reading frame 62 (C12orf62), mRNA [NM_032901]	0.0616422	0.764541	1.01455
OSBPL10	NM_017784	ref|Homo sapiens oxysterol binding protein-like 10 (OSBPL10), transcript variant 1, mRNA [NM_017784]	0.0154888	-0.646517	-0.864802
LRIG1	NM_015541	ref|Homo sapiens leucine-rich repeats and immunoglobulin-like domains 1 (LRIG1), mRNA [NM_015541]	-0.0882164	-0.101455	-0.544645
ZNF259P1	CR627448	gb|Homo sapiens mRNA; cDNA DKFZp781A1422 (from clone DKFZp781A1422). [CR627448]	0.266813	0.151421	0.592954
RNF130	NM_018434	ref|Homo sapiens ring finger protein 130 (RNF130), mRNA [NM_018434]	-0.416459	-0.0930178	-0.502701
CHIC2	NM_012110	ref|Homo sapiens cysteine-rich hydrophobic domain 2 (CHIC2), mRNA [NM_012110]	0.340676	0.326883	0.497744
RPS29	NM_001032	ref|Homo sapiens ribosomal protein S29 (RPS29), transcript variant 1, mRNA [NM_001032]	0.143119	0.474171	0.612858
HSPG2	NM_005529	ref|Homo sapiens heparan sulfate proteoglycan 2 (HSPG2), mRNA [NM_005529]	-0.400021	-0.711311	-0.427459
EGFR	NM_005228	ref|Homo sapiens epidermal growth factor receptor (EGFR), transcript variant 1, mRNA [NM_005228]	0.232309	-0.51861	-0.35016
TNPO3	NM_012470	ref|Homo sapiens transportin 3 (TNPO3), transcript variant 1, mRNA [NM_012470]	-0.0174073	-0.366148	-0.245339
KIAA0146	NM_001080394	ref|Homo sapiens KIAA0146 (KIAA0146), mRNA [NM_001080394]	-0.531648	-0.709517	-0.967645
TULP4	NM_020245	ref|Homo sapiens tubby like protein 4 (TULP4), transcript variant 1, mRNA [NM_020245]	-0.13816	-0.206591	-0.521978
STAG3	NM_012447	ref|Homo sapiens stromal antigen 3 (STAG3), mRNA [NM_012447]	0.272365	0.0909404	0.724859
ERCC5	NM_000123	ref|Homo sapiens excision repair cross-complementing rodent repair deficiency, complementation group 5 (ERCC5), mRNA [NM_000123]	0.210933	0.103697	0.52084
ART5	NM_053017	ref|Homo sapiens ADP-ribosyltransferase 5 (ART5), transcript variant 1, mRNA [NM_053017]	0.477793	0.981716	1.53726
BCAR1	NM_014567	ref|Homo sapiens breast cancer anti-estrogen resistance 1 (BCAR1), transcript variant 6, mRNA [NM_014567]	-0.0213214	-0.0771165	0.0793153
MED27	NM_004269	ref|Homo sapiens mediator complex subunit 27 (MED27), mRNA [NM_004269]	-0.280494	-0.533253	-0.758029
FOXJ3	NM_014947	ref|Homo sapiens forkhead box J3 (FOXJ3), transcript variant 1, mRNA [NM_014947]	0.000253936	-0.352209	-0.320822
SLC39A6	NM_012319	ref|Homo sapiens solute carrier family 39 (zinc transporter), member 6 (SLC39A6), transcript variant 1, mRNA [NM_012319]	0.13419	0.452735	0.732909
HN1	NM_001002033	ref|Homo sapiens hematological and neurological expressed 1 (HN1), transcript variant 3, mRNA [NM_001002033]	0.310326	0.271327	0.719521
VKORC1L1	NM_173517	ref|Homo sapiens vitamin K epoxide reductase complex, subunit 1-like 1 (VKORC1L1), mRNA [NM_173517]	-0.0940203	-0.398619	-0.54171
MSL1	NM_001012241	ref|Homo sapiens male-specific lethal 1 homolog (Drosophila) (MSL1), mRNA [NM_001012241]	0.112814	0.227994	0.697186
CLEC2D	NM_001004419	ref|Homo sapiens C-type lectin domain family 2, member D (CLEC2D), transcript variant 2, mRNA [NM_001004419]	0.904792	0.0551666	-0.160961
EXOC1	NM_001024924	ref|Homo sapiens exocyst complex component 1 (EXOC1), transcript variant 3, mRNA [NM_001024924]	0.367191	0.574513	0.622356
CCDC99	NM_017785	ref|Homo sapiens coiled-coil domain containing 99 (CCDC99), mRNA [NM_017785]	0.236345	0.316686	0.722143
MBP	NM_001025101	ref|Homo sapiens myelin basic protein (MBP), transcript variant 7, mRNA [NM_001025101]	0.114718	-0.348785	0.12206
DIAPH3	NM_001042517	ref|Homo sapiens diaphanous homolog 3 (Drosophila) (DIAPH3), transcript variant 1, mRNA [NM_001042517]	-0.209417	-0.455838	-0.884298
PSMD2	NM_002808	ref|Homo sapiens proteasome (prosome, macropain) 26S subunit, non-ATPase, 2 (PSMD2), mRNA [NM_002808]	0.0971293	0.304532	0.613604
TSSC1	NM_003310	ref|Homo sapiens tumor suppressing subtransferable candidate 1 (TSSC1), mRNA [NM_003310]	-0.256116	-0.651732	-1.14372
RAPGEF6	NM_016340	ref|Homo sapiens Rap guanine nucleotide exchange factor (GEF) 6 (RAPGEF6), transcript variant 2, mRNA [NM_016340]	0.0922583	0.0951615	-0.0885379
FTH1	NM_002032	ref|Homo sapiens ferritin, heavy polypeptide 1 (FTH1), mRNA [NM_002032]	0.257101	0.165593	0.457794
ARHGEF19	NM_153213	ref|Homo sapiens Rho guanine nucleotide exchange factor (GEF) 19 (ARHGEF19), mRNA [NM_153213]	0.391544	0.511051	0.849548
C14orf106	NM_018353	ref|Homo sapiens chromosome 14 open reading frame 106 (C14orf106), mRNA [NM_018353]	0.417212	0.10404	0.44512
E2F4	NM_001950	ref|Homo sapiens E2F transcription factor 4, p107/p130-binding (E2F4), mRNA [NM_001950]	-0.150299	-0.54475	-0.552201
UHRF2	NM_152896	ref|Homo sapiens ubiquitin-like with PHD and ring finger domains 2 (UHRF2), mRNA [NM_152896]	0.198242	0.395696	0.53596
A_33_P3240295	A_33_P3240295	Unknown	-0.0228146	-0.50483	-0.839925
FAM193A	NM_003704	ref|Homo sapiens family with sequence similarity 193, member A (FAM193A), mRNA [NM_003704]	-0.224239	-0.239494	-0.704381
CENPP	NM_001012267	ref|Homo sapiens centromere protein P (CENPP), mRNA [NM_001012267]	-0.345571	-0.197523	-0.545239
RANBP3	NM_003624	ref|Homo sapiens RAN binding protein 3 (RANBP3), transcript variant RANBP3-a, mRNA [NM_003624]	-0.187641	0.0305033	-0.176764
LRIG1	NM_015541	ref|Homo sapiens leucine-rich repeats and immunoglobulin-like domains 1 (LRIG1), mRNA [NM_015541]	-0.126583	-0.104314	-0.547872
ANAPC1	NM_022662	ref|Homo sapiens anaphase promoting complex subunit 1 (ANAPC1), mRNA [NM_022662]	-0.064734	-0.0931605	-0.38834
TRAP1	NM_016292	ref|Homo sapiens TNF receptor-associated protein 1 (TRAP1), mRNA [NM_016292]	-0.408479	-0.288185	-0.947765
EPRS	NM_004446	ref|Homo sapiens glutamyl-prolyl-tRNA synthetase (EPRS), mRNA [NM_004446]	0.0792936	-0.0712352	-0.34362
MTHFD1	NM_005956	ref|Homo sapiens methylenetetrahydrofolate dehydrogenase (NADP+ dependent) 1, methenyltetrahydrofolate cyclohydrolase, formyltetrahydrofolate synthetase (MTHFD1), mRNA [NM_005956]	-0.232799	-0.31329	-0.992556
PRDM2	NM_012231	ref|Homo sapiens PR domain containing 2, with ZNF domain (PRDM2), transcript variant 1, mRNA [NM_012231]	0.0179341	0.133036	0.51139
PSMD1	NM_002807	ref|Homo sapiens proteasome (prosome, macropain) 26S subunit, non-ATPase, 1 (PSMD1), transcript variant 1, mRNA [NM_002807]	0.00253824	-0.467998	-0.489398
RNF122	NM_024787	ref|Homo sapiens ring finger protein 122 (RNF122), mRNA [NM_024787]	0.301765	0.854851	1.9351
ASCL2	NM_005170	ref|Homo sapiens achaete-scute complex homolog 2 (Drosophila) (ASCL2), mRNA [NM_005170]	-0.413606	-0.301986	-0.659595
CCNE2	NM_057749	ref|Homo sapiens cyclin E2 (CCNE2), mRNA [NM_057749]	0.487379	0.736728	1.1472
FANCA	NM_000135	ref|Homo sapiens Fanconi anemia, complementation group A (FANCA), transcript variant 1, mRNA [NM_000135]	-0.0214852	0.436149	-0.0736983
CCNJ	NM_019084	ref|Homo sapiens cyclin J (CCNJ), transcript variant 2, mRNA [NM_019084]	0.306314	0.142982	0.579333
PHLDB3	NM_198850	ref|Homo sapiens pleckstrin homology-like domain, family B, member 3 (PHLDB3), mRNA [NM_198850]	0.121215	0.673261	0.880385
TXK	NM_003328	ref|Homo sapiens TXK tyrosine kinase (TXK), mRNA [NM_003328]	0.88939	0.961568	1.5263
MPHOSPH10	NM_005791	ref|Homo sapiens M-phase phosphoprotein 10 (U3 small nucleolar ribonucleoprotein) (MPHOSPH10), mRNA [NM_005791]	0.122495	0.20327	0.446862
PAFAH1B1	NM_000430	ref|Homo sapiens platelet-activating factor acetylhydrolase 1b, regulatory subunit 1 (45kDa) (PAFAH1B1), mRNA [NM_000430]	-0.120107	-0.354896	-0.556507
SPECC1L	NM_015330	ref|Homo sapiens sperm antigen with calponin homology and coiled-coil domains 1-like (SPECC1L), transcript variant 1, mRNA [NM_015330]	-0.174019	-0.0589044	-0.409096
LUC7L2	NM_016019	ref|Homo sapiens LUC7-like 2 (S. cerevisiae) (LUC7L2), mRNA [NM_016019]	-0.108516	-0.367741	-0.497884
ZFAND3	NM_021943	ref|Homo sapiens zinc finger, AN1-type domain 3 (ZFAND3), mRNA [NM_021943]	-0.0722496	-0.80473	-1.03737
RBM22	NM_018047	ref|Homo sapiens RNA binding motif protein 22 (RBM22), mRNA [NM_018047]	0.259987	0.54911	0.746799
ABHD15	NM_198147	ref|Homo sapiens abhydrolase domain containing 15 (ABHD15), mRNA [NM_198147]	0.234224	0.543528	0.791087
FANCA	NM_000135	ref|Homo sapiens Fanconi anemia, complementation group A (FANCA), transcript variant 1, mRNA [NM_000135]	-0.0412264	0.423352	-0.0531263
GAPDH	NM_002046	ref|Homo sapiens glyceraldehyde-3-phosphate dehydrogenase (GAPDH), mRNA [NM_002046]	-0.135559	-0.222777	-0.589437
HMBS	NM_000190	ref|Homo sapiens hydroxymethylbilane synthase (HMBS), transcript variant 1, mRNA [NM_000190]	-0.240703	-0.574041	-0.793296
ANKRD13A	NM_033121	ref|Homo sapiens ankyrin repeat domain 13A (ANKRD13A), mRNA [NM_033121]	0.476296	1.16324	1.52381
GTF2A2	NM_004492	ref|Homo sapiens general transcription factor IIA, 2, 12kDa (GTF2A2), mRNA [NM_004492]	0.15214	-0.014804	0.368651
PARP12	NM_022750	ref|Homo sapiens poly (ADP-ribose) polymerase family, member 12 (PARP12), mRNA [NM_022750]	0.363851	0.235496	0.232329
MAPKSP1	NM_021970	ref|Homo sapiens MAPK scaffold protein 1 (MAPKSP1), transcript variant 1, mRNA [NM_021970]	0.353992	0.181204	0.942671
LOC388242	NR_002556	ref|Homo sapiens coiled-coil domain containing 101 pseudogene (LOC388242), non-coding RNA [NR_002556]	0.422976	0.996874	1.053
TRMT2B	NM_024917	ref|Homo sapiens TRM2 tRNA methyltransferase 2 homolog B (S. cerevisiae) (TRMT2B), transcript variant 1, mRNA [NM_024917]	-0.484409	-0.397257	-0.729731
SIGLEC16	NR_002825	ref|Homo sapiens sialic acid binding Ig-like lectin 16 (gene/pseudogene) (SIGLEC16), non-coding RNA [NR_002825]	-0.229969	0.479917	0.197279
ERLEC1	NM_015701	ref|Homo sapiens endoplasmic reticulum lectin 1 (ERLEC1), transcript variant 1, mRNA [NM_015701]	0.270248	0.359489	0.433562
LAMB3	NM_001017402	ref|Homo sapiens laminin, beta 3 (LAMB3), transcript variant 2, mRNA [NM_001017402]	0.51894	0.664038	0.961593
FAM199X	NM_207318	ref|Homo sapiens family with sequence similarity 199, X-linked (FAM199X), mRNA [NM_207318]	0.284285	0.176971	0.563447
G3BP1	NM_005754	ref|Homo sapiens GTPase activating protein (SH3 domain) binding protein 1 (G3BP1), transcript variant 1, mRNA [NM_005754]	0.187974	-0.351349	-0.250324
TFAM	NM_003201	ref|Homo sapiens transcription factor A, mitochondrial (TFAM), nuclear gene encoding mitochondrial protein, mRNA [NM_003201]	-0.0038016	0.0317788	0.358263
FLCN	NM_144997	ref|Homo sapiens folliculin (FLCN), transcript variant 1, mRNA [NM_144997]	-0.0710825	0.308519	0.287831
LOC283484	AK090861	gb|Homo sapiens cDNA FLJ33542 fis, clone BRAMY2007753. [AK090861]	0.00364842	-0.492163	-0.730393
HEATR7B1	ENST00000396517	ens|HEAT repeat containing 7B1 [Source:HGNC Symbol;Acc:27936] [ENST00000396517]	1.95012	-0.21323	0.811101
VMA21	NM_001017980	ref|Homo sapiens VMA21 vacuolar H+-ATPase homolog (S. cerevisiae) (VMA21), mRNA [NM_001017980]	0.313355	-0.303984	0.642933
RRN3	NM_018427	ref|Homo sapiens RRN3 RNA polymerase I transcription factor homolog (S. cerevisiae) (RRN3), mRNA [NM_018427]	0.248984	0.2015	0.72361
ZBTB44	NM_014155	ref|Homo sapiens zinc finger and BTB domain containing 44 (ZBTB44), mRNA [NM_014155]	-0.100068	0.645812	0.838603
GAPDH	NM_002046	ref|Homo sapiens glyceraldehyde-3-phosphate dehydrogenase (GAPDH), mRNA [NM_002046]	-0.132479	-0.232598	-0.61456
RAB7B	NM_177403	ref|Homo sapiens RAB7B, member RAS oncogene family (RAB7B), transcript variant 1, mRNA [NM_177403]	0.285197	0.391212	0.654376
BACH1	NR_027655	ref|Homo sapiens BTB and CNC homology 1, basic leucine zipper transcription factor 1 (BACH1), transcript variant 3, non-coding RNA [NR_027655]	0.0455463	-0.421873	-0.520718
APH1A	NM_016022	ref|Homo sapiens anterior pharynx defective 1 homolog A (C. elegans) (APH1A), transcript variant 2, mRNA [NM_016022]	-0.665569	-0.483481	-1.30412
FNDC3B	NM_022763	ref|Homo sapiens fibronectin type III domain containing 3B (FNDC3B), transcript variant 1, mRNA [NM_022763]	0.340468	-0.239495	-0.0857
AGFG1	NM_001135187	ref|Homo sapiens ArfGAP with FG repeats 1 (AGFG1), transcript variant 1, mRNA [NM_001135187]	0.104449	-0.39374	-0.378633
MSH3	NM_002439	ref|Homo sapiens mutS homolog 3 (E. coli) (MSH3), mRNA [NM_002439]	-0.181689	-0.562337	-0.618155
ZNF468	NM_199132	ref|Homo sapiens zinc finger protein 468 (ZNF468), transcript variant 1, mRNA [NM_199132]	0.154514	0.368491	0.777945
A_33_P3285018	A_33_P3285018	Unknown	0.316132	0.453424	0.746844
ENST00000273411	ENST00000273411	gb|Homo sapiens mRNA for ribosomal protein L39 variant protein. [AB209077]	0.206027	0.260108	0.50203
MTHFD1	NM_005956	ref|Homo sapiens methylenetetrahydrofolate dehydrogenase (NADP+ dependent) 1, methenyltetrahydrofolate cyclohydrolase, formyltetrahydrofolate synthetase (MTHFD1), mRNA [NM_005956]	-0.226975	-0.336187	-0.995354
PEA15	NM_003768	ref|Homo sapiens phosphoprotein enriched in astrocytes 15 (PEA15), mRNA [NM_003768]	0.187782	0.0342911	0.19999
CTPS2	NM_175859	ref|Homo sapiens CTP synthase II (CTPS2), transcript variant 2, mRNA [NM_175859]	-0.258201	-0.614603	-0.788858
RPL3	NM_000967	ref|Homo sapiens ribosomal protein L3 (RPL3), transcript variant 1, mRNA [NM_000967]	-0.128017	-0.0377946	-0.576697
WHAMM	NM_001080435	ref|Homo sapiens WAS protein homolog associated with actin, golgi membranes and microtubules (WHAMM), mRNA [NM_001080435]	0.310692	0.238539	0.621515
ATL3	NM_015459	ref|Homo sapiens atlastin GTPase 3 (ATL3), mRNA [NM_015459]	0.232886	-0.0017278	0.533628
HEATR7B1	XM_001721240	ref|PREDICTED: Homo sapiens HEAT repeat containing 7B1 (HEATR7B1), mRNA [XM_001721240]	1.94123	-0.13084	1.27236
CERK	NM_022766	ref|Homo sapiens ceramide kinase (CERK), mRNA [NM_022766]	-0.251465	-0.499482	-0.573752
ZNF284	NM_001037813	ref|Homo sapiens zinc finger protein 284 (ZNF284), mRNA [NM_001037813]	0.366721	0.748467	1.42702
BIVM	NM_017693	ref|Homo sapiens basic, immunoglobulin-like variable motif containing (BIVM), transcript variant 1, mRNA [NM_017693]	-0.119646	-0.0678842	-0.396749
OTUD6B	NM_016023	ref|Homo sapiens OTU domain containing 6B (OTUD6B), mRNA [NM_016023]	-0.0219901	-0.593778	-0.65574
KIAA1683	NM_001145305	ref|Homo sapiens KIAA1683 (KIAA1683), transcript variant 3, mRNA [NM_001145305]	-0.162014	-0.0654924	0.151659
SPIN1	NM_006717	ref|Homo sapiens spindlin 1 (SPIN1), mRNA [NM_006717]	-0.0505726	-0.457179	-0.414564
ELMOD2	NM_153702	ref|Homo sapiens ELMO/CED-12 domain containing 2 (ELMOD2), mRNA [NM_153702]	0.381959	0.426173	0.765205
SSR4	NM_006280	ref|Homo sapiens signal sequence receptor, delta (translocon-associated protein delta) (SSR4), mRNA [NM_006280]	0.117168	0.491772	0.578546
ACOX2	NM_003500	ref|Homo sapiens acyl-CoA oxidase 2, branched chain (ACOX2), mRNA [NM_003500]	0.683571	0.999317	1.44163
BLZF1	NM_003666	ref|Homo sapiens basic leucine zipper nuclear factor 1 (BLZF1), mRNA [NM_003666]	0.458194	-0.336612	-0.0540343
PIGG	NM_017733	ref|Homo sapiens phosphatidylinositol glycan anchor biosynthesis, class G (PIGG), transcript variant 2, mRNA [NM_017733]	0.112947	0.968721	1.03981
NCOA2	NM_006540	ref|Homo sapiens nuclear receptor coactivator 2 (NCOA2), mRNA [NM_006540]	-0.340293	-0.668853	-0.65784
GUSBP1	NR_027028	ref|Homo sapiens glucuronidase, beta pseudogene 1 (GUSBP1), transcript variant 3, non-coding RNA [NR_027028]	-0.373852	0.0406875	-0.309919
RPL21	NM_000982	ref|Homo sapiens ribosomal protein L21 (RPL21), mRNA [NM_000982]	0.180497	0.235322	0.368582
PIGY	NM_001042616	ref|Homo sapiens phosphatidylinositol glycan anchor biosynthesis, class Y (PIGY), nuclear gene encoding mitochondrial protein, transcript variant 2, mRNA [NM_001042616]	0.26996	0.438715	0.74677
A_33_P3421515	A_33_P3421515	Unknown	0.148496	-0.598937	-0.703527
CDC42EP4	NM_012121	ref|Homo sapiens CDC42 effector protein (Rho GTPase binding) 4 (CDC42EP4), mRNA [NM_012121]	0.171485	0.408502	0.659789
GOSR2	NM_004287	ref|Homo sapiens golgi SNAP receptor complex member 2 (GOSR2), transcript variant A, mRNA [NM_004287]	0.272654	0.619245	1.17024
MLLT1	NM_005934	ref|Homo sapiens myeloid/lymphoid or mixed-lineage leukemia (trithorax homolog, Drosophila); translocated to, 1 (MLLT1), mRNA [NM_005934]	-0.286526	-0.538524	-0.626888
BIVM	NM_017693	ref|Homo sapiens basic, immunoglobulin-like variable motif containing (BIVM), transcript variant 1, mRNA [NM_017693]	-0.0771848	0.0246558	-0.486751
MYO9A	NM_006901	ref|Homo sapiens myosin IXA (MYO9A), mRNA [NM_006901]	-0.500635	-0.699816	-1.06
SMARCB1	NM_003073	ref|Homo sapiens SWI/SNF related, matrix associated, actin dependent regulator of chromatin, subfamily b, member 1 (SMARCB1), transcript variant 1, mRNA [NM_003073]	-0.159469	-0.461956	-0.777667
NUDT8	NM_181843	ref|Homo sapiens nudix (nucleoside diphosphate linked moiety X)-type motif 8 (NUDT8), mRNA [NM_181843]	-0.0833111	-0.117269	0.0420958
TXNRD2	NM_006440	ref|Homo sapiens thioredoxin reductase 2 (TXNRD2), nuclear gene encoding mitochondrial protein, mRNA [NM_006440]	-0.446102	-0.635114	-0.599497
OGFOD2	NM_024623	ref|Homo sapiens 2-oxoglutarate and iron-dependent oxygenase domain containing 2 (OGFOD2), mRNA [NM_024623]	-0.00173481	0.233816	0.489635
FGFR1OP2	NM_015633	ref|Homo sapiens FGFR1 oncogene partner 2 (FGFR1OP2), transcript variant 1, mRNA [NM_015633]	0.188758	0.242989	0.676141
FANCA	NM_000135	ref|Homo sapiens Fanconi anemia, complementation group A (FANCA), transcript variant 1, mRNA [NM_000135]	-0.0662114	0.403821	-0.0533034
OGFOD2	NM_024623	ref|Homo sapiens 2-oxoglutarate and iron-dependent oxygenase domain containing 2 (OGFOD2), mRNA [NM_024623]	-0.293151	0.326909	0.290233
BAX	NM_138764	ref|Homo sapiens BCL2-associated X protein (BAX), transcript variant sigma, mRNA [NM_138764]	-0.349706	-0.161941	-0.591967
KDM5B	NM_006618	ref|Homo sapiens lysine (K)-specific demethylase 5B (KDM5B), mRNA [NM_006618]	-0.0557422	0.484465	0.599209
TSPAN9	NM_006675	ref|Homo sapiens tetraspanin 9 (TSPAN9), transcript variant 1, mRNA [NM_006675]	-0.44075	-0.159383	-0.673415
RGS10	NM_001005339	ref|Homo sapiens regulator of G-protein signaling 10 (RGS10), transcript variant 1, mRNA [NM_001005339]	0.15481	0.348721	0.370722
ATL3	NM_015459	ref|Homo sapiens atlastin GTPase 3 (ATL3), mRNA [NM_015459]	0.234032	0.0201703	0.553712
MED23	NM_015979	ref|Homo sapiens mediator complex subunit 23 (MED23), transcript variant 2, mRNA [NM_015979]	0.204592	0.176999	0.531069
R3HDM1	NM_015361	ref|Homo sapiens R3H domain containing 1 (R3HDM1), mRNA [NM_015361]	-0.205824	-0.444544	-0.74039
SGK1	NM_005627	ref|Homo sapiens serum/glucocorticoid regulated kinase 1 (SGK1), transcript variant 1, mRNA [NM_005627]	0.538021	1.05519	1.46336
A_33_P3306973	A_33_P3306973	Unknown	0.360689	0.0902286	0.582483
ELP4	NM_019040	ref|Homo sapiens elongation protein 4 homolog (S. cerevisiae) (ELP4), mRNA [NM_019040]	-0.0563481	-0.68982	-0.701669
ATF3	NM_001040619	ref|Homo sapiens activating transcription factor 3 (ATF3), transcript variant 4, mRNA [NM_001040619]	0.291313	-0.111715	0.207743
A_33_P3397298	A_33_P3397298	Unknown	-0.122407	-0.606708	-0.550487
LBH	NM_030915	ref|Homo sapiens limb bud and heart development homolog (mouse) (LBH), mRNA [NM_030915]	-0.179005	0.39715	0.225312
ACVR1B	NM_020328	ref|Homo sapiens activin A receptor, type IB (ACVR1B), transcript variant 3, mRNA [NM_020328]	0.049519	0.742406	0.804582
GAPDH	NM_002046	ref|Homo sapiens glyceraldehyde-3-phosphate dehydrogenase (GAPDH), mRNA [NM_002046]	-0.140961	-0.226204	-0.581171
CCDC99	NM_017785	ref|Homo sapiens coiled-coil domain containing 99 (CCDC99), mRNA [NM_017785]	0.218862	0.36031	0.73542
HNRNPA1L2	NM_001011724	ref|Homo sapiens heterogeneous nuclear ribonucleoprotein A1-like 2 (HNRNPA1L2), transcript variant 1, mRNA [NM_001011724]	-0.168631	-0.401071	-0.64116
HERC4	NM_022079	ref|Homo sapiens hect domain and RLD 4 (HERC4), transcript variant 1, mRNA [NM_022079]	-0.122911	0.246265	0.108208
CADM1	NM_014333	ref|Homo sapiens cell adhesion molecule 1 (CADM1), transcript variant 1, mRNA [NM_014333]	-0.207531	-0.879436	-1.67057
ATP11B	NM_014616	ref|Homo sapiens ATPase, class VI, type 11B (ATP11B), mRNA [NM_014616]	-0.179043	-0.180245	-0.592666
NKIRAS1	NM_020345	ref|Homo sapiens NFKB inhibitor interacting Ras-like 1 (NKIRAS1), mRNA [NM_020345]	0.44791	0.26887	0.565698
C2CD3	NM_015531	ref|Homo sapiens C2 calcium-dependent domain containing 3 (C2CD3), mRNA [NM_015531]	-0.0789267	0.0444674	-0.229787
PDLIM5	NM_001011516	ref|Homo sapiens PDZ and LIM domain 5 (PDLIM5), transcript variant 5, mRNA [NM_001011516]	0.138782	-0.161777	-0.218846
ICT1	NM_001545	ref|Homo sapiens immature colon carcinoma transcript 1 (ICT1), mRNA [NM_001545]	-0.169234	-0.292674	-0.571814
RAB10	NM_016131	ref|Homo sapiens RAB10, member RAS oncogene family (RAB10), mRNA [NM_016131]	0.0337932	-0.193775	-0.471795
CNNM4	NM_020184	ref|Homo sapiens cyclin M4 (CNNM4), mRNA [NM_020184]	0.228482	0.996501	1.45313
HSPA8	AK310467	gb|Homo sapiens cDNA, FLJ17509. [AK310467]	-0.119006	-0.690608	-0.691358
TAX1BP1	NM_006024	ref|Homo sapiens Tax1 (human T-cell leukemia virus type I) binding protein 1 (TAX1BP1), transcript variant 1, mRNA [NM_006024]	0.197474	0.374988	0.513913
SLC41A3	NM_017836	ref|Homo sapiens solute carrier family 41, member 3 (SLC41A3), transcript variant 2, mRNA [NM_017836]	-0.0654182	-0.234828	-0.424988
BRSK2	NM_003957	ref|Homo sapiens BR serine/threonine kinase 2 (BRSK2), mRNA [NM_003957]	-0.0151038	-0.439382	-0.179592
PPP1R14B	NM_138689	ref|Homo sapiens protein phosphatase 1, regulatory (inhibitor) subunit 14B (PPP1R14B), mRNA [NM_138689]	-0.108083	-0.589481	-0.796662
CYR61	NM_001554	ref|Homo sapiens cysteine-rich, angiogenic inducer, 61 (CYR61), mRNA [NM_001554]	0.0526307	-0.400123	-1.15928
AARSD1	NM_025267	ref|Homo sapiens alanyl-tRNA synthetase domain containing 1 (AARSD1), transcript variant 2, mRNA [NM_025267]	-0.172863	-0.270704	-0.586568
ICAM1	NM_000201	ref|Homo sapiens intercellular adhesion molecule 1 (ICAM1), mRNA [NM_000201]	0.118763	0.391763	0.369562
WDR24	NM_032259	ref|Homo sapiens WD repeat domain 24 (WDR24), mRNA [NM_032259]	-0.0551457	0.214827	0.470421
PIK3R3	NM_003629	ref|Homo sapiens phosphoinositide-3-kinase, regulatory subunit 3 (gamma) (PIK3R3), transcript variant 1, mRNA [NM_003629]	-0.27646	0.701035	0.948967
CDADC1	NM_001193478	ref|Homo sapiens cytidine and dCMP deaminase domain containing 1 (CDADC1), transcript variant 2, mRNA [NM_001193478]	0.132276	0.238778	0.701133
ART5	NM_053017	ref|Homo sapiens ADP-ribosyltransferase 5 (ART5), transcript variant 1, mRNA [NM_053017]	0.134963	0.276399	0.816126
SLC35B4	NM_032826	ref|Homo sapiens solute carrier family 35, member B4 (SLC35B4), mRNA [NM_032826]	-0.190164	-0.261247	-0.72883
PAPOLG	NM_022894	ref|Homo sapiens poly(A) polymerase gamma (PAPOLG), mRNA [NM_022894]	0.227763	0.18834	0.498941
RILP	NM_031430	ref|Homo sapiens Rab interacting lysosomal protein (RILP), mRNA [NM_031430]	0.643242	0.609663	0.652933
ACOX2	NM_003500	ref|Homo sapiens acyl-CoA oxidase 2, branched chain (ACOX2), mRNA [NM_003500]	0.780173	1.00629	1.40615
PRKAR1B	NM_002735	ref|Homo sapiens protein kinase, cAMP-dependent, regulatory, type I, beta (PRKAR1B), transcript variant 2, mRNA [NM_002735]	-0.59628	-0.58006	-0.945755
CCDC99	NM_017785	ref|Homo sapiens coiled-coil domain containing 99 (CCDC99), mRNA [NM_017785]	0.238811	0.354041	0.677395
C12orf47	NR_015404	ref|Homo sapiens chromosome 12 open reading frame 47 (C12orf47), non-coding RNA [NR_015404]	0.12328	0.696192	0.765335
NECAP1	NM_015509	ref|Homo sapiens NECAP endocytosis associated 1 (NECAP1), transcript variant 1, mRNA [NM_015509]	-0.00264917	0.342727	0.171472
NEIL2	NM_145043	ref|Homo sapiens nei endonuclease VIII-like 2 (E. coli) (NEIL2), transcript variant 1, mRNA [NM_145043]	0.0182944	-0.334879	-0.404445
SCARNA5	NR_003008	ref|Homo sapiens small Cajal body-specific RNA 5 (SCARNA5), guide RNA [NR_003008]	0.167862	0.63168	0.641676
ATL3	NM_015459	ref|Homo sapiens atlastin GTPase 3 (ATL3), mRNA [NM_015459]	0.263612	0.0241667	0.528846
EEF1A1	NM_001402	ref|Homo sapiens eukaryotic translation elongation factor 1 alpha 1 (EEF1A1), mRNA [NM_001402]	-0.137456	-0.0172966	-0.379474
MGAT1	NM_002406	ref|Homo sapiens mannosyl (alpha-1,3-)-glycoprotein beta-1,2-N-acetylglucosaminyltransferase (MGAT1), transcript variant 2, mRNA [NM_002406]	0.0246275	-0.0427301	-0.0383416
METT5D1	NM_152636	ref|Homo sapiens methyltransferase 5 domain containing 1 (METT5D1), transcript variant 2, mRNA [NM_152636]	0.0483347	-0.587218	-0.660434
CCDC99	NM_017785	ref|Homo sapiens coiled-coil domain containing 99 (CCDC99), mRNA [NM_017785]	0.201998	0.360711	0.643945
HN1	NM_001002033	ref|Homo sapiens hematological and neurological expressed 1 (HN1), transcript variant 3, mRNA [NM_001002033]	0.293693	0.286917	0.715437
PPFIBP1	NM_003622	ref|Homo sapiens PTPRF interacting protein, binding protein 1 (liprin beta 1) (PPFIBP1), transcript variant 1, mRNA [NM_003622]	-0.0757274	-0.171964	-0.603168
UBIAD1	NM_013319	ref|Homo sapiens UbiA prenyltransferase domain containing 1 (UBIAD1), mRNA [NM_013319]	0.176512	0.173821	0.610013
ZNF813	NM_001004301	ref|Homo sapiens zinc finger protein 813 (ZNF813), mRNA [NM_001004301]	-0.0302274	0.182773	0.287839
ANAPC1	NM_022662	ref|Homo sapiens anaphase promoting complex subunit 1 (ANAPC1), mRNA [NM_022662]	-0.0253647	-0.0907275	0.190746
CCDC142	NM_032779	ref|Homo sapiens coiled-coil domain containing 142 (CCDC142), mRNA [NM_032779]	0.186887	0.914273	0.891453
MAPK9	NM_001135044	ref|Homo sapiens mitogen-activated protein kinase 9 (MAPK9), transcript variant JNK2-g, mRNA [NM_001135044]	0.0270334	-0.226266	-0.083503
WTAP	NM_004906	ref|Homo sapiens Wilms tumor 1 associated protein (WTAP), transcript variant 1, mRNA [NM_004906]	-0.00279226	-0.336277	-0.252802
2016-03-07	NM_022826	ref|Homo sapiens membrane-associated ring finger (C3HC4) 7 (MARCH7), mRNA [NM_022826]	0.364415	0.152535	0.607101
FAM96A	NM_001014812	ref|Homo sapiens family with sequence similarity 96, member A (FAM96A), transcript variant 2, mRNA [NM_001014812]	0.275199	0.67555	0.964832
A_24_P603890	A_24_P603890	Unknown	-0.192416	-0.367762	-0.604925
TRIM39-RPP21	NM_001199119	ref|Homo sapiens TRIM39-RPP21 read-through transcript (TRIM39-RPP21), mRNA [NM_001199119]	0.0869869	-0.0220379	0.322377
NCOR1	NM_001190438	ref|Homo sapiens nuclear receptor corepressor 1 (NCOR1), transcript variant 2, mRNA [NM_001190438]	-0.00876707	0.423029	0.356435
CDADC1	NM_030911	ref|Homo sapiens cytidine and dCMP deaminase domain containing 1 (CDADC1), transcript variant 1, mRNA [NM_030911]	-0.0473419	-0.233437	-0.0481363
EXOC1	NM_001024924	ref|Homo sapiens exocyst complex component 1 (EXOC1), transcript variant 3, mRNA [NM_001024924]	0.282417	0.500157	0.65962
HIST1H4J	NM_021968	ref|Homo sapiens histone cluster 1, H4j (HIST1H4J), mRNA [NM_021968]	-0.345082	-0.980217	-1.051
ZFAND3	NM_021943	ref|Homo sapiens zinc finger, AN1-type domain 3 (ZFAND3), mRNA [NM_021943]	-0.225921	-0.780563	-1.11962
SIAH1	NM_003031	ref|Homo sapiens seven in absentia homolog 1 (Drosophila) (SIAH1), transcript variant 1, mRNA [NM_003031]	0.105075	-0.0476816	0.384521
RPS18	NM_022551	ref|Homo sapiens ribosomal protein S18 (RPS18), mRNA [NM_022551]	0.195988	0.441549	0.455551
SMCR7L	NM_019008	ref|Homo sapiens Smith-Magenis syndrome chromosome region, candidate 7-like (SMCR7L), mRNA [NM_019008]	0.101825	0.264391	0.379819
CRTC2	NM_181715	ref|Homo sapiens CREB regulated transcription coactivator 2 (CRTC2), mRNA [NM_181715]	0.159483	0.485333	0.76803
TFAM	NM_003201	ref|Homo sapiens transcription factor A, mitochondrial (TFAM), nuclear gene encoding mitochondrial protein, mRNA [NM_003201]	0.273135	0.269201	0.765592
CLEC2D	NM_001004419	ref|Homo sapiens C-type lectin domain family 2, member D (CLEC2D), transcript variant 2, mRNA [NM_001004419]	-0.0200774	-0.489835	-0.648526
ACACA	NM_198839	ref|Homo sapiens acetyl-CoA carboxylase alpha (ACACA), transcript variant 2, mRNA [NM_198839]	-0.284039	-0.360242	-1.28675
ECSCR	NM_001077693	ref|Homo sapiens endothelial cell-specific chemotaxis regulator (ECSCR), mRNA [NM_001077693]	0.433477	0.734993	0.891586
FANCA	NM_001018112	ref|Homo sapiens Fanconi anemia, complementation group A (FANCA), transcript variant 2, mRNA [NM_001018112]	-0.0224739	-0.0433753	-0.244698
GLUL	NM_002065	ref|Homo sapiens glutamate-ammonia ligase (GLUL), transcript variant 1, mRNA [NM_002065]	0.066171	0.469606	1.02433
NOMO1	ENST00000287667	ens|NODAL modulator 1 [Source:HGNC Symbol;Acc:30060] [ENST00000287667]	-0.150393	0.451413	-0.00347355
SLC25A23	NM_024103	ref|Homo sapiens solute carrier family 25 (mitochondrial carrier; phosphate carrier), member 23 (SLC25A23), nuclear gene encoding mitochondrial protein, mRNA [NM_024103]	-0.159098	-0.133234	-0.555431
HNRNPU	NM_031844	ref|Homo sapiens heterogeneous nuclear ribonucleoprotein U (scaffold attachment factor A) (HNRNPU), transcript variant 1, mRNA [NM_031844]	-0.1137	-0.548928	-0.97611
EEF1A1	NM_001402	ref|Homo sapiens eukaryotic translation elongation factor 1 alpha 1 (EEF1A1), mRNA [NM_001402]	-0.299382	-0.365183	-0.63766
ABCA4	NM_000350	ref|Homo sapiens ATP-binding cassette, sub-family A (ABC1), member 4 (ABCA4), mRNA [NM_000350]	0.134103	0.664279	1.04064
HN1	NM_001002033	ref|Homo sapiens hematological and neurological expressed 1 (HN1), transcript variant 3, mRNA [NM_001002033]	0.247505	0.293928	0.696148
RPL41	NM_001035267	ref|Homo sapiens ribosomal protein L41 (RPL41), transcript variant 2, mRNA [NM_001035267]	0.143785	0.712176	0.765858
ANKRD36	NM_001164315	ref|Homo sapiens ankyrin repeat domain 36 (ANKRD36), mRNA [NM_001164315]	-0.0737758	0.373557	0.024839
A_33_P3321923	A_33_P3321923	Unknown	-0.25912	-0.398477	-0.708528
TOPORS	NM_005802	ref|Homo sapiens topoisomerase I binding, arginine/serine-rich, E3 ubiquitin protein ligase (TOPORS), transcript variant 1, mRNA [NM_005802]	0.264022	0.466007	0.525058
ATF3	NM_001674	ref|Homo sapiens activating transcription factor 3 (ATF3), transcript variant 1, mRNA [NM_001674]	0.221213	-0.28692	0.0786702
YY1AP1	NM_139118	ref|Homo sapiens YY1 associated protein 1 (YY1AP1), transcript variant 2, mRNA [NM_139118]	0.085573	0.549833	0.928769
CCNF	NM_001761	ref|Homo sapiens cyclin F (CCNF), mRNA [NM_001761]	-0.253628	-0.509228	-0.385028
SLC41A1	NM_173854	ref|Homo sapiens solute carrier family 41, member 1 (SLC41A1), mRNA [NM_173854]	0.359449	1.35655	1.36601
ANKRD1	NM_014391	ref|Homo sapiens ankyrin repeat domain 1 (cardiac muscle) (ANKRD1), mRNA [NM_014391]	-0.0160706	-1.09685	-1.90973
LXN	NM_020169	ref|Homo sapiens latexin (LXN), mRNA [NM_020169]	1.71369	0.0617088	1.69165
2016-03-07	NM_022826	ref|Homo sapiens membrane-associated ring finger (C3HC4) 7 (MARCH7), mRNA [NM_022826]	0.284645	0.0270455	0.562879
QSER1	NM_001076786	ref|Homo sapiens glutamine and serine rich 1 (QSER1), mRNA [NM_001076786]	-0.0359596	-0.184039	-0.540284
VPREB3	NM_013378	ref|Homo sapiens pre-B lymphocyte 3 (VPREB3), mRNA [NM_013378]	-0.0140462	0.390111	0.466257
HN1	NM_001002033	ref|Homo sapiens hematological and neurological expressed 1 (HN1), transcript variant 3, mRNA [NM_001002033]	0.241736	0.269781	0.688347
POC1A	NM_015426	ref|Homo sapiens POC1 centriolar protein homolog A (Chlamydomonas) (POC1A), transcript variant 1, mRNA [NM_015426]	-0.348621	-0.598149	-0.721791
SHMT1	NM_004169	ref|Homo sapiens serine hydroxymethyltransferase 1 (soluble) (SHMT1), nuclear gene encoding mitochondrial protein, transcript variant 1, mRNA [NM_004169]	-0.216232	-0.092547	-0.32125
SLC44A1	NM_080546	ref|Homo sapiens solute carrier family 44, member 1 (SLC44A1), mRNA [NM_080546]	-0.276231	-0.329272	-0.837738
SRSF11	NM_004768	ref|Homo sapiens serine/arginine-rich splicing factor 11 (SRSF11), transcript variant 1, mRNA [NM_004768]	0.265781	0.237753	0.443427
A_33_P3210702	A_33_P3210702	Unknown	-0.0917912	-0.320771	-0.459729
LGTN	NM_006893	ref|Homo sapiens ligatin (LGTN), mRNA [NM_006893]	-0.176288	-0.227899	-0.551921
PTPN11	NM_002834	ref|Homo sapiens protein tyrosine phosphatase, non-receptor type 11 (PTPN11), mRNA [NM_002834]	0.193162	0.111538	0.081774
DEPDC7	NM_139160	ref|Homo sapiens DEP domain containing 7 (DEPDC7), transcript variant 2, mRNA [NM_139160]	0.372744	0.794142	1.12769
ZNF432	NM_014650	ref|Homo sapiens zinc finger protein 432 (ZNF432), mRNA [NM_014650]	0.526183	0.296703	0.86414
TBC1D1	NM_015173	ref|Homo sapiens TBC1 (tre-2/USP6, BUB2, cdc16) domain family, member 1 (TBC1D1), mRNA [NM_015173]	-0.251149	-0.54688	-0.867479
NPRL3	NM_001039476	ref|Homo sapiens nitrogen permease regulator-like 3 (S. cerevisiae) (NPRL3), transcript variant 2, mRNA [NM_001039476]	-0.309096	-0.380277	-0.791157
LRRC57	NM_153260	ref|Homo sapiens leucine rich repeat containing 57 (LRRC57), mRNA [NM_153260]	0.307154	0.347212	0.910363
FLJ40504	NR_028334	ref|Homo sapiens keratin 18 pseudogene (FLJ40504), non-coding RNA [NR_028334]	0.122048	-0.375744	-0.859231
APOO	NM_024122	ref|Homo sapiens apolipoprotein O (APOO), transcript variant 1, mRNA [NM_024122]	-0.132733	-0.563099	-0.727312
NDUFA13	NM_015965	ref|Homo sapiens NADH dehydrogenase (ubiquinone) 1 alpha subcomplex, 13 (NDUFA13), nuclear gene encoding mitochondrial protein, mRNA [NM_015965]	0.0187521	0.243441	0.405429
VPS36	NM_016075	ref|Homo sapiens vacuolar protein sorting 36 homolog (S. cerevisiae) (VPS36), mRNA [NM_016075]	-0.095742	-0.798019	-1.02174
C3orf17	NM_015412	ref|Homo sapiens chromosome 3 open reading frame 17 (C3orf17), transcript variant 1, mRNA [NM_015412]	-0.0935132	-0.267065	-0.421567
ERCC5	AK294708	gb|Homo sapiens cDNA FLJ51835 complete cds, highly similar to DNA-repair protein complementing XP-G cells. [AK294708]	-0.0553895	0.0733535	0.349438
HS2ST1	NM_001134492	ref|Homo sapiens heparan sulfate 2-O-sulfotransferase 1 (HS2ST1), transcript variant 2, mRNA [NM_001134492]	-0.0621871	-0.167717	-0.261657
ZMYM4	NM_005095	ref|Homo sapiens zinc finger, MYM-type 4 (ZMYM4), mRNA [NM_005095]	-0.136452	-0.297561	-1.1377
CA12	NM_001218	ref|Homo sapiens carbonic anhydrase XII (CA12), transcript variant 1, mRNA [NM_001218]	0.323238	0.773152	0.971349
RAB20	NM_017817	ref|Homo sapiens RAB20, member RAS oncogene family (RAB20), mRNA [NM_017817]	-0.416667	-0.761487	-0.738637
GUSBP1	NR_027026	ref|Homo sapiens glucuronidase, beta pseudogene 1 (GUSBP1), transcript variant 1, non-coding RNA [NR_027026]	-0.132164	-0.382128	-0.160604
ENST00000429480	ENST00000429480	ref|PREDICTED: Homo sapiens chromosome 1 open reading frame 211 (C1orf211), miscRNA [XR_109862]	0.231253	0.69609	0.987267
CHI3L1	NM_001276	ref|Homo sapiens chitinase 3-like 1 (cartilage glycoprotein-39) (CHI3L1), mRNA [NM_001276]	-0.146947	-0.510162	-1.17034
ERH	NM_004450	ref|Homo sapiens enhancer of rudimentary homolog (Drosophila) (ERH), mRNA [NM_004450]	-0.26864	-0.527247	-0.652239
STAG3	NM_012447	ref|Homo sapiens stromal antigen 3 (STAG3), mRNA [NM_012447]	1.08686	0.481546	1.76603
A_33_P3238225	A_33_P3238225	Unknown	-0.0469837	-0.405806	-0.46763
MKLN1	NM_001145354	ref|Homo sapiens muskelin 1, intracellular mediator containing kelch motifs (MKLN1), transcript variant 1, mRNA [NM_001145354]	0.10876	0.00853909	0.237958
PRKCD	NM_006254	ref|Homo sapiens protein kinase C, delta (PRKCD), transcript variant 1, mRNA [NM_006254]	0.228606	0.129645	0.342939
NUP153	NM_005124	ref|Homo sapiens nucleoporin 153kDa (NUP153), mRNA [NM_005124]	-0.0995154	-0.323292	-0.691513
SRSF11	NM_004768	ref|Homo sapiens serine/arginine-rich splicing factor 11 (SRSF11), transcript variant 1, mRNA [NM_004768]	0.270964	0.175162	0.452108
MAPKSP1	NM_021970	ref|Homo sapiens MAPK scaffold protein 1 (MAPKSP1), transcript variant 1, mRNA [NM_021970]	0.361607	0.240684	0.929169
SRSF10	NM_054016	ref|Homo sapiens serine/arginine-rich splicing factor 10 (SRSF10), transcript variant 2, mRNA [NM_054016]	-0.0269236	-0.316854	-0.455002
COQ5	NM_032314	ref|Homo sapiens coenzyme Q5 homolog, methyltransferase (S. cerevisiae) (COQ5), nuclear gene encoding mitochondrial protein, mRNA [NM_032314]	-0.291026	-0.565429	-0.703213
ITPK1	NM_014216	ref|Homo sapiens inositol 1,3,4-triphosphate 5/6 kinase (ITPK1), transcript variant 1, mRNA [NM_014216]	-0.146396	-0.86473	-0.907794
ANKRD36	NM_001164315	ref|Homo sapiens ankyrin repeat domain 36 (ANKRD36), mRNA [NM_001164315]	0.0933466	-0.71932	-0.698504
RB1CC1	NM_014781	ref|Homo sapiens RB1-inducible coiled-coil 1 (RB1CC1), transcript variant 1, mRNA [NM_014781]	0.497751	0.575717	0.891542
MRPL22	NM_001014990	ref|Homo sapiens mitochondrial ribosomal protein L22 (MRPL22), nuclear gene encoding mitochondrial protein, transcript variant 2, mRNA [NM_001014990]	-0.0756653	-0.319523	-0.484597
ANKRD11	NM_013275	ref|Homo sapiens ankyrin repeat domain 11 (ANKRD11), mRNA [NM_013275]	-0.137944	-0.170796	-0.791904
NHP2L1	NM_005008	ref|Homo sapiens NHP2 non-histone chromosome protein 2-like 1 (S. cerevisiae) (NHP2L1), transcript variant 1, mRNA [NM_005008]	0.0827526	0.302445	0.350167
HESX1	NM_003865	ref|Homo sapiens HESX homeobox 1 (HESX1), mRNA [NM_003865]	0.23529	0.227254	0.744961
BC045716	BC045716	gb|Homo sapiens cDNA clone IMAGE:5261156. [BC045716]	0.10226	0.359055	0.613533
C14orf138	NM_024558	ref|Homo sapiens chromosome 14 open reading frame 138 (C14orf138), transcript variant 1, mRNA [NM_024558]	0.17548	0.209146	0.54636
FHL2	NM_001039492	ref|Homo sapiens four and a half LIM domains 2 (FHL2), transcript variant 5, mRNA [NM_001039492]	0.146616	-0.5736	-0.70054
KATNA1	NM_007044	ref|Homo sapiens katanin p60 (ATPase-containing) subunit A 1 (KATNA1), mRNA [NM_007044]	0.1297	0.0543062	0.502152
ZNF462	NM_021224	ref|Homo sapiens zinc finger protein 462 (ZNF462), mRNA [NM_021224]	-0.222738	-0.470174	-0.66467
ORC2	NM_006190	ref|Homo sapiens origin recognition complex, subunit 2 (ORC2), transcript variant 1, mRNA [NM_006190]	-0.0138732	-0.257258	-0.444208
MSH3	NM_002439	ref|Homo sapiens mutS homolog 3 (E. coli) (MSH3), mRNA [NM_002439]	-0.11881	-0.520898	-0.592318
TBL1Y	NM_033284	ref|Homo sapiens transducin (beta)-like 1, Y-linked (TBL1Y), transcript variant 1, mRNA [NM_033284]	-0.555985	-1.28251	-1.30818
SERF1A	NM_022968	ref|Homo sapiens small EDRK-rich factor 1A (telomeric) (SERF1A), transcript variant 2, mRNA [NM_022968]	0.21449	0.405771	0.972155
CNNM4	NM_020184	ref|Homo sapiens cyclin M4 (CNNM4), mRNA [NM_020184]	0.194801	0.981491	1.40477
CDK11B	NM_033487	ref|Homo sapiens cyclin-dependent kinase 11B (CDK11B), transcript variant 3, mRNA [NM_033487]	-0.100592	0.187188	0.162666
LGTN	NM_006893	ref|Homo sapiens ligatin (LGTN), mRNA [NM_006893]	-0.197794	-0.229044	-0.53134
HSP90AA1	NM_005348	ref|Homo sapiens heat shock protein 90kDa alpha (cytosolic), class A member 1 (HSP90AA1), transcript variant 2, mRNA [NM_005348]	-0.0468002	-0.478626	-0.589473
BAZ1B	NM_032408	ref|Homo sapiens bromodomain adjacent to zinc finger domain, 1B (BAZ1B), mRNA [NM_032408]	-0.0455097	-0.0832433	-0.427667
MAPKSP1	NM_021970	ref|Homo sapiens MAPK scaffold protein 1 (MAPKSP1), transcript variant 1, mRNA [NM_021970]	0.339685	0.239947	0.906587
PRDX1	NM_002574	ref|Homo sapiens peroxiredoxin 1 (PRDX1), transcript variant 1, mRNA [NM_002574]	0.200976	0.441848	0.68446
POLR1C	NM_203290	ref|Homo sapiens polymerase (RNA) I polypeptide C, 30kDa (POLR1C), transcript variant 1, mRNA [NM_203290]	0.136551	0.272317	0.668039
ZC3H11A	NM_014827	ref|Homo sapiens zinc finger CCCH-type containing 11A (ZC3H11A), mRNA [NM_014827]	0.0291205	0.107487	0.100645
DYRK1A	NM_130436	ref|Homo sapiens dual-specificity tyrosine-(Y)-phosphorylation regulated kinase 1A (DYRK1A), transcript variant 2, mRNA [NM_130436]	0.158849	-0.328235	-0.312266
MTF2	NM_007358	ref|Homo sapiens metal response element binding transcription factor 2 (MTF2), transcript variant 1, mRNA [NM_007358]	-0.0178386	0.271223	0.359385
ZNF160	NM_198893	ref|Homo sapiens zinc finger protein 160 (ZNF160), transcript variant 2, mRNA [NM_198893]	0.193237	0.456831	0.421066
FHL2	NM_001039492	ref|Homo sapiens four and a half LIM domains 2 (FHL2), transcript variant 5, mRNA [NM_001039492]	0.161629	-0.587359	-0.71737
ZFP90	NM_133458	ref|Homo sapiens zinc finger protein 90 homolog (mouse) (ZFP90), mRNA [NM_133458]	0.171698	0.578265	0.626108
FHL2	NM_001039492	ref|Homo sapiens four and a half LIM domains 2 (FHL2), transcript variant 5, mRNA [NM_001039492]	0.171813	-0.573891	-0.727113
AQR	ENST00000156471	ens|aquarius homolog (mouse) [Source:HGNC Symbol;Acc:29513] [ENST00000156471]	-0.233198	-0.332502	-0.692408
EXT2	NM_000401	ref|Homo sapiens exostosin 2 (EXT2), transcript variant 1, mRNA [NM_000401]	-0.246078	-0.251292	-0.835355
PCNXL3	NM_032223	ref|Homo sapiens pecanex-like 3 (Drosophila) (PCNXL3), mRNA [NM_032223]	0.0209814	0.323952	0.421292
SRD5A1	NM_001047	ref|Homo sapiens steroid-5-alpha-reductase, alpha polypeptide 1 (3-oxo-5 alpha-steroid delta 4-dehydrogenase alpha 1) (SRD5A1), mRNA [NM_001047]	0.351309	0.195342	0.341406
KCTD9	NM_017634	ref|Homo sapiens potassium channel tetramerisation domain containing 9 (KCTD9), mRNA [NM_017634]	0.060769	0.223576	0.462149
NDUFS4	NM_002495	ref|Homo sapiens NADH dehydrogenase (ubiquinone) Fe-S protein 4, 18kDa (NADH-coenzyme Q reductase) (NDUFS4), nuclear gene encoding mitochondrial protein, mRNA [NM_002495]	-0.0763152	-0.898639	-1.03877
ORMDL2	NM_014182	ref|Homo sapiens ORM1-like 2 (S. cerevisiae) (ORMDL2), mRNA [NM_014182]	0.175222	0.490888	0.996446
DNM2	NM_001005360	ref|Homo sapiens dynamin 2 (DNM2), transcript variant 1, mRNA [NM_001005360]	-0.203886	-0.42873	-0.618679
ZNF670	NM_033213	ref|Homo sapiens zinc finger protein 670 (ZNF670), mRNA [NM_033213]	0.17658	0.494436	0.894018
A_24_P255874	A_24_P255874	Unknown	0.137404	0.847224	1.02102
EEF1A1	M29548	gb|Human elongation factor 1-alpha (EF1A) mRNA, partial cds. [M29548]	-0.122711	-0.0503625	-0.395432
SCN3B	NM_018400	ref|Homo sapiens sodium channel, voltage-gated, type III, beta (SCN3B), transcript variant 1, mRNA [NM_018400]	0.717215	0.322685	0.787426
KIAA1539	NM_025182	ref|Homo sapiens KIAA1539 (KIAA1539), mRNA [NM_025182]	0.397605	0.681159	0.956711
WDFY2	NM_052950	ref|Homo sapiens WD repeat and FYVE domain containing 2 (WDFY2), mRNA [NM_052950]	0.105065	-0.412894	-0.437351
C10orf11	NM_032024	ref|Homo sapiens chromosome 10 open reading frame 11 (C10orf11), mRNA [NM_032024]	-0.406438	-1.2883	-1.43741
EGFR	NM_005228	ref|Homo sapiens epidermal growth factor receptor (EGFR), transcript variant 1, mRNA [NM_005228]	0.191466	-0.4121	-0.377441
SNX9	NM_016224	ref|Homo sapiens sorting nexin 9 (SNX9), mRNA [NM_016224]	-0.0495305	-0.24263	-0.622551
FANCA	NM_000135	ref|Homo sapiens Fanconi anemia, complementation group A (FANCA), transcript variant 1, mRNA [NM_000135]	-0.0607133	0.406337	-0.0773143
MAPKSP1	NM_021970	ref|Homo sapiens MAPK scaffold protein 1 (MAPKSP1), transcript variant 1, mRNA [NM_021970]	0.332471	0.159374	0.919005
ICOSLG	NM_015259	ref|Homo sapiens inducible T-cell co-stimulator ligand (ICOSLG), mRNA [NM_015259]	-0.280072	-0.371721	-0.422809
RASA4	NM_006989	ref|Homo sapiens RAS p21 protein activator 4 (RASA4), transcript variant 1, mRNA [NM_006989]	0.437444	1.28277	0.919891
SRSF11	NM_004768	ref|Homo sapiens serine/arginine-rich splicing factor 11 (SRSF11), transcript variant 1, mRNA [NM_004768]	0.275247	0.236232	0.485033
TPD52L1	NM_001003395	ref|Homo sapiens tumor protein D52-like 1 (TPD52L1), transcript variant 2, mRNA [NM_001003395]	-0.643139	-0.675906	-1.06011
NCOR2	NM_006312	ref|Homo sapiens nuclear receptor corepressor 2 (NCOR2), transcript variant 1, mRNA [NM_006312]	-0.18648	-0.397185	-1.06811
GSS	NM_000178	ref|Homo sapiens glutathione synthetase (GSS), mRNA [NM_000178]	-0.164479	-0.064179	-0.424153
A_33_P3351615	A_33_P3351615	Unknown	0.127836	0.323415	0.508872
RGP1	NM_001080496	ref|Homo sapiens RGP1 retrograde golgi transport homolog (S. cerevisiae) (RGP1), mRNA [NM_001080496]	0.0543546	0.110169	0.20462
ERCC5	NM_000123	ref|Homo sapiens excision repair cross-complementing rodent repair deficiency, complementation group 5 (ERCC5), mRNA [NM_000123]	0.204784	0.128689	0.504881
BIVM	NM_017693	ref|Homo sapiens basic, immunoglobulin-like variable motif containing (BIVM), transcript variant 1, mRNA [NM_017693]	-0.0237811	-0.057108	-0.483412
CREBBP	NM_004380	ref|Homo sapiens CREB binding protein (CREBBP), transcript variant 1, mRNA [NM_004380]	-0.284472	-0.119581	-0.492956
PPM1G	NM_177983	ref|Homo sapiens protein phosphatase, Mg2+/Mn2+ dependent, 1G (PPM1G), mRNA [NM_177983]	-0.203027	-0.283645	-0.731201
ARHGEF10	NM_014629	ref|Homo sapiens Rho guanine nucleotide exchange factor (GEF) 10 (ARHGEF10), mRNA [NM_014629]	-0.303297	-0.180432	-0.98228
XPO5	NM_020750	ref|Homo sapiens exportin 5 (XPO5), mRNA [NM_020750]	-0.0231953	-0.186878	-0.337165
BAX	NM_138764	ref|Homo sapiens BCL2-associated X protein (BAX), transcript variant sigma, mRNA [NM_138764]	-0.394028	-0.170267	-0.604793
PLEKHG5	NM_198681	ref|Homo sapiens pleckstrin homology domain containing, family G (with RhoGef domain) member 5 (PLEKHG5), transcript variant 2, mRNA [NM_198681]	-0.106012	-0.16301	-0.230233
ZC3H11A	NM_014827	ref|Homo sapiens zinc finger CCCH-type containing 11A (ZC3H11A), mRNA [NM_014827]	0.118796	0.344403	0.458885
C5orf4	NM_032385	ref|Homo sapiens chromosome 5 open reading frame 4 (C5orf4), mRNA [NM_032385]	0.399122	1.37962	2.16275
CIDEC	NM_022094	ref|Homo sapiens cell death-inducing DFFA-like effector c (CIDEC), transcript variant 3, mRNA [NM_022094]	0.612362	0.630454	1.0521
DLGAP3	NM_001080418	ref|Homo sapiens discs, large (Drosophila) homolog-associated protein 3 (DLGAP3), mRNA [NM_001080418]	0.0578532	0.0052585	0.528092
MIB1	NM_020774	ref|Homo sapiens mindbomb homolog 1 (Drosophila) (MIB1), mRNA [NM_020774]	0.0086409	-0.0164901	-0.605066
PALLD	NM_001166109	ref|Homo sapiens palladin, cytoskeletal associated protein (PALLD), transcript variant 3, mRNA [NM_001166109]	0.165535	-0.246347	0.0636605
ITPR2	NM_002223	ref|Homo sapiens inositol 1,4,5-triphosphate receptor, type 2 (ITPR2), mRNA [NM_002223]	-0.681648	-0.197353	-0.955009
LOC284889	BC036909	gb|Homo sapiens, clone IMAGE:5164782, mRNA. [BC036909]	-0.205997	-0.591395	-0.626969
ROR1	NM_005012	ref|Homo sapiens receptor tyrosine kinase-like orphan receptor 1 (ROR1), transcript variant 1, mRNA [NM_005012]	-0.135428	-0.887807	-1.28844
KRT83	NM_002282	ref|Homo sapiens keratin 83 (KRT83), mRNA [NM_002282]	0.502502	-0.48598	-0.0692696
THADA	NM_022065	ref|Homo sapiens thyroid adenoma associated (THADA), transcript variant 1, mRNA [NM_022065]	-0.307225	-0.449448	-0.875937
TNXB	NM_019105	ref|Homo sapiens tenascin XB (TNXB), transcript variant XB, mRNA [NM_019105]	-0.166087	0.771082	0.859361
FKBP1B	NM_054033	ref|Homo sapiens FK506 binding protein 1B, 12.6 kDa (FKBP1B), transcript variant 2, mRNA [NM_054033]	0.684835	0.755912	1.53029
OLA1	NM_013341	ref|Homo sapiens Obg-like ATPase 1 (OLA1), transcript variant 1, mRNA [NM_013341]	-0.0668669	-0.69747	-0.920605
SLC25A5	NM_001152	ref|Homo sapiens solute carrier family 25 (mitochondrial carrier; adenine nucleotide translocator), member 5 (SLC25A5), nuclear gene encoding mitochondrial protein, mRNA [NM_001152]	-0.169998	-0.269377	-0.433628
PRMT1	NM_001536	ref|Homo sapiens protein arginine methyltransferase 1 (PRMT1), transcript variant 1, mRNA [NM_001536]	-0.231227	-0.51583	-0.715116
PRKCD	NM_006254	ref|Homo sapiens protein kinase C, delta (PRKCD), transcript variant 1, mRNA [NM_006254]	0.176982	0.105223	0.361064
ATL3	NM_015459	ref|Homo sapiens atlastin GTPase 3 (ATL3), mRNA [NM_015459]	0.225527	0.0263316	0.532973
DEF8	NM_017702	ref|Homo sapiens differentially expressed in FDCP 8 homolog (mouse) (DEF8), transcript variant 2, mRNA [NM_017702]	0.250713	0.326763	0.685756
ADIPOR1	NM_015999	ref|Homo sapiens adiponectin receptor 1 (ADIPOR1), transcript variant 1, mRNA [NM_015999]	-0.0180169	-0.0387597	0.0613
HMBS	NM_000190	ref|Homo sapiens hydroxymethylbilane synthase (HMBS), transcript variant 1, mRNA [NM_000190]	-0.262338	-0.581409	-0.785253
PRKCD	NM_006254	ref|Homo sapiens protein kinase C, delta (PRKCD), transcript variant 1, mRNA [NM_006254]	0.266234	0.118619	0.376281
UBE3C	NM_014671	ref|Homo sapiens ubiquitin protein ligase E3C (UBE3C), mRNA [NM_014671]	0.0487329	-0.207481	-0.358821
STK3	NM_006281	ref|Homo sapiens serine/threonine kinase 3 (STK3), mRNA [NM_006281]	-0.092241	-0.77359	-1.1958
IFT172	NM_015662	ref|Homo sapiens intraflagellar transport 172 homolog (Chlamydomonas) (IFT172), mRNA [NM_015662]	-0.296594	-0.355568	-0.743649
ACOX2	NM_003500	ref|Homo sapiens acyl-CoA oxidase 2, branched chain (ACOX2), mRNA [NM_003500]	0.753229	1.01554	1.4427
KATNA1	NM_007044	ref|Homo sapiens katanin p60 (ATPase-containing) subunit A 1 (KATNA1), mRNA [NM_007044]	0.127338	0.066329	0.54306
TP53INP1	NM_033285	ref|Homo sapiens tumor protein p53 inducible nuclear protein 1 (TP53INP1), transcript variant 1, mRNA [NM_033285]	0.563872	1.73694	2.03708
RIBC1	NM_001031745	ref|Homo sapiens RIB43A domain with coiled-coils 1 (RIBC1), transcript variant 1, mRNA [NM_001031745]	0.237198	0.374958	0.43513
PLEKHB2	NM_017958	ref|Homo sapiens pleckstrin homology domain containing, family B (evectins) member 2 (PLEKHB2), transcript variant 2, mRNA [NM_017958]	0.0317552	-0.0822548	0.424342
MBD1	NM_015845	ref|Homo sapiens methyl-CpG binding domain protein 1 (MBD1), transcript variant 2, mRNA [NM_015845]	0.139567	-0.0242082	0.124863
C3orf19	NM_016474	ref|Homo sapiens chromosome 3 open reading frame 19 (C3orf19), mRNA [NM_016474]	0.13168	0.476106	0.791768
FAM193A	NM_003704	ref|Homo sapiens family with sequence similarity 193, member A (FAM193A), mRNA [NM_003704]	-0.155788	-0.29031	-0.626927
MTAP	NM_002451	ref|Homo sapiens methylthioadenosine phosphorylase (MTAP), mRNA [NM_002451]	0.123211	0.0857027	0.168574
FUT8	NM_178154	ref|Homo sapiens fucosyltransferase 8 (alpha (1,6) fucosyltransferase) (FUT8), transcript variant 2, mRNA [NM_178154]	0.183759	-0.438106	-0.741905
GINS4	NM_032336	ref|Homo sapiens GINS complex subunit 4 (Sld5 homolog) (GINS4), mRNA [NM_032336]	-0.0604717	0.212077	0.442685
ICA1	NM_004968	ref|Homo sapiens islet cell autoantigen 1, 69kDa (ICA1), transcript variant 2, mRNA [NM_004968]	-0.430202	-0.794681	-1.25358
NRIP1	NM_003489	ref|Homo sapiens nuclear receptor interacting protein 1 (NRIP1), mRNA [NM_003489]	0.154858	0.452585	0.661462
RTP4	NM_022147	ref|Homo sapiens receptor (chemosensory) transporter protein 4 (RTP4), mRNA [NM_022147]	0.119021	0.502698	1.47976
AGPAT5	NM_018361	ref|Homo sapiens 1-acylglycerol-3-phosphate O-acyltransferase 5 (lysophosphatidic acid acyltransferase, epsilon) (AGPAT5), mRNA [NM_018361]	-0.163509	-0.266612	-0.695683
ZNF544	NM_014480	ref|Homo sapiens zinc finger protein 544 (ZNF544), mRNA [NM_014480]	-0.143102	-0.265861	-0.102044
TSPAN4	NM_001025237	ref|Homo sapiens tetraspanin 4 (TSPAN4), transcript variant 1, mRNA [NM_001025237]	-0.233857	-0.329639	-0.409161
PAFAH1B1	NM_000430	ref|Homo sapiens platelet-activating factor acetylhydrolase 1b, regulatory subunit 1 (45kDa) (PAFAH1B1), mRNA [NM_000430]	-0.148244	-0.359811	-0.590343
WAPAL	NM_015045	ref|Homo sapiens wings apart-like homolog (Drosophila) (WAPAL), mRNA [NM_015045]	0.053015	-0.336523	-0.204331
PATZ1	NM_032051	ref|Homo sapiens POZ (BTB) and AT hook containing zinc finger 1 (PATZ1), transcript variant 4, mRNA [NM_032051]	-0.156448	-0.52242	-0.436837
LSM1	NM_014462	ref|Homo sapiens LSM1 homolog, U6 small nuclear RNA associated (S. cerevisiae) (LSM1), mRNA [NM_014462]	0.120636	0.2274	0.485073
STIP1	NM_006819	ref|Homo sapiens stress-induced-phosphoprotein 1 (STIP1), mRNA [NM_006819]	-0.0127756	-0.6427	-0.673741
ABLIM1	NM_001003408	ref|Homo sapiens actin binding LIM protein 1 (ABLIM1), transcript variant 3, mRNA [NM_001003408]	0.0589691	-0.0179452	-0.26287
MED13	NM_005121	ref|Homo sapiens mediator complex subunit 13 (MED13), mRNA [NM_005121]	-0.189464	-0.047572	-0.594976
SNORA74B	NR_002988	ref|Homo sapiens small nucleolar RNA, H/ACA box 74B (SNORA74B), small nucleolar RNA [NR_002988]	0.193208	0.569448	0.926558
COQ6	NM_182476	ref|Homo sapiens coenzyme Q6 homolog, monooxygenase (S. cerevisiae) (COQ6), nuclear gene encoding mitochondrial protein, transcript variant 1, mRNA [NM_182476]	0.00399342	0.375434	0.421799
ACBD4	NM_024722	ref|Homo sapiens acyl-CoA binding domain containing 4 (ACBD4), transcript variant 2, mRNA [NM_024722]	-0.369422	-0.287191	-0.473273
KRTAP4-1	NM_033060	ref|Homo sapiens keratin associated protein 4-1 (KRTAP4-1), mRNA [NM_033060]	-0.109982	0.309756	0.242603
MKLN1	NM_013255	ref|Homo sapiens muskelin 1, intracellular mediator containing kelch motifs (MKLN1), transcript variant 2, mRNA [NM_013255]	-0.0838383	-0.101357	-0.375988
THADA	NM_022065	ref|Homo sapiens thyroid adenoma associated (THADA), transcript variant 1, mRNA [NM_022065]	-0.253535	-0.542316	-0.946408
2016-03-07	NM_022826	ref|Homo sapiens membrane-associated ring finger (C3HC4) 7 (MARCH7), mRNA [NM_022826]	0.373928	0.172684	0.658327
ERCC5	NM_000123	ref|Homo sapiens excision repair cross-complementing rodent repair deficiency, complementation group 5 (ERCC5), mRNA [NM_000123]	0.140579	0.127856	0.53057
PRDX1	NM_002574	ref|Homo sapiens peroxiredoxin 1 (PRDX1), transcript variant 1, mRNA [NM_002574]	0.256247	0.420666	0.700518
EIF2B1	NM_001414	ref|Homo sapiens eukaryotic translation initiation factor 2B, subunit 1 alpha, 26kDa (EIF2B1), mRNA [NM_001414]	0.0626306	0.422462	0.620747
KLHL15	NM_030624	ref|Homo sapiens kelch-like 15 (Drosophila) (KLHL15), mRNA [NM_030624]	-0.00696855	0.408502	0.775735
BLZF1	ENST00000367808	ens|basic leucine zipper nuclear factor 1 [Source:HGNC Symbol;Acc:1065] [ENST00000367808]	0.569661	0.599874	0.897077
FRMD8	NM_031904	ref|Homo sapiens FERM domain containing 8 (FRMD8), mRNA [NM_031904]	-0.0713084	0.234249	0.162306
ENST00000378274	ENST00000378274	ens|emopamil binding protein-like [Source:HGNC Symbol;Acc:18061] [ENST00000378274]	0.174361	0.569963	0.877579
TUBB3	NM_006086	ref|Homo sapiens tubulin, beta 3 (TUBB3), transcript variant 1, mRNA [NM_006086]	0.426597	0.515952	1.19074
SIAH1	NM_003031	ref|Homo sapiens seven in absentia homolog 1 (Drosophila) (SIAH1), transcript variant 1, mRNA [NM_003031]	0.146082	-0.0589903	0.390417
CCDC99	NM_017785	ref|Homo sapiens coiled-coil domain containing 99 (CCDC99), mRNA [NM_017785]	0.232206	0.315683	0.656986
STIP1	NM_006819	ref|Homo sapiens stress-induced-phosphoprotein 1 (STIP1), mRNA [NM_006819]	-0.00424105	-0.526069	-0.510168
BACE1	NM_012104	ref|Homo sapiens beta-site APP-cleaving enzyme 1 (BACE1), transcript variant a, mRNA [NM_012104]	-0.0839543	0.209117	0.0205613
TAF8	NM_138572	ref|Homo sapiens TAF8 RNA polymerase II, TATA box binding protein (TBP)-associated factor, 43kDa (TAF8), mRNA [NM_138572]	0.0917032	0.37642	0.568826
LOC407835	NR_002144	ref|Homo sapiens mitogen-activated protein kinase kinase 2 pseudogene (LOC407835), non-coding RNA [NR_002144]	-0.263521	-0.241676	-0.75839
ZNF160	NM_198893	ref|Homo sapiens zinc finger protein 160 (ZNF160), transcript variant 2, mRNA [NM_198893]	0.226367	0.431823	0.877966
PTPN11	NM_002834	ref|Homo sapiens protein tyrosine phosphatase, non-receptor type 11 (PTPN11), mRNA [NM_002834]	0.227293	0.0678199	0.0632751
SMC1A	NM_006306	ref|Homo sapiens structural maintenance of chromosomes 1A (SMC1A), mRNA [NM_006306]	-0.0639439	0.066973	-0.0723068
ATRX	NM_000489	ref|Homo sapiens alpha thalassemia/mental retardation syndrome X-linked (ATRX), transcript variant 1, mRNA [NM_000489]	-0.135608	-0.140709	-0.51414
TBL1Y	NM_033284	ref|Homo sapiens transducin (beta)-like 1, Y-linked (TBL1Y), transcript variant 1, mRNA [NM_033284]	-0.47072	-1.25124	-1.21757
CHMP6	NM_024591	ref|Homo sapiens chromatin modifying protein 6 (CHMP6), mRNA [NM_024591]	-0.280471	-0.867579	-0.650896
HNRNPL	NM_001533	ref|Homo sapiens heterogeneous nuclear ribonucleoprotein L (HNRNPL), transcript variant 1, mRNA [NM_001533]	-0.0678467	-0.577856	-0.743222
ROR1	ENST00000371079	ens|receptor tyrosine kinase-like orphan receptor 1 [Source:HGNC Symbol;Acc:10256] [ENST00000371079]	-0.109289	-0.969342	-1.28366
ENST00000373333	ENST00000373333	ens|zinc finger, MYM-type 6 [Source:HGNC Symbol;Acc:13050] [ENST00000373333]	0.203638	0.597162	0.869189
SLC5A11	NM_052944	ref|Homo sapiens solute carrier family 5 (sodium/glucose cotransporter), member 11 (SLC5A11), mRNA [NM_052944]	0.993866	0.177246	1.29319
EGFR	NM_005228	ref|Homo sapiens epidermal growth factor receptor (EGFR), transcript variant 1, mRNA [NM_005228]	0.164669	-0.5027	-0.415135
WHAMM	NM_001080435	ref|Homo sapiens WAS protein homolog associated with actin, golgi membranes and microtubules (WHAMM), mRNA [NM_001080435]	-0.0588866	-0.249869	-0.0952936
RPS29	NM_001030001	ref|Homo sapiens ribosomal protein S29 (RPS29), transcript variant 2, mRNA [NM_001030001]	0.277894	0.847531	1.21647
EXOC1	NM_001024924	ref|Homo sapiens exocyst complex component 1 (EXOC1), transcript variant 3, mRNA [NM_001024924]	0.322799	0.521253	0.686576
SMARCC1	NM_003074	ref|Homo sapiens SWI/SNF related, matrix associated, actin dependent regulator of chromatin, subfamily c, member 1 (SMARCC1), mRNA [NM_003074]	-0.0666051	-0.21744	-0.772943
TMEM85	NM_016454	ref|Homo sapiens transmembrane protein 85 (TMEM85), mRNA [NM_016454]	0.0161983	0.0884366	0.233237
ST7	NM_018412	ref|Homo sapiens suppression of tumorigenicity 7 (ST7), transcript variant a, mRNA [NM_018412]	-0.196263	-0.211846	-0.67417
MICAL1	NM_022765	ref|Homo sapiens microtubule associated monoxygenase, calponin and LIM domain containing 1 (MICAL1), transcript variant 1, mRNA [NM_022765]	0.272865	0.353875	0.285236
LRIG1	NM_015541	ref|Homo sapiens leucine-rich repeats and immunoglobulin-like domains 1 (LRIG1), mRNA [NM_015541]	-0.106558	-0.134347	-0.534699
THADA	NM_022065	ref|Homo sapiens thyroid adenoma associated (THADA), transcript variant 1, mRNA [NM_022065]	-0.211138	-0.486222	-0.970341
SNRNP35	NM_022717	ref|Homo sapiens small nuclear ribonucleoprotein 35kDa (U11/U12) (SNRNP35), transcript variant 2, mRNA [NM_022717]	-0.224147	-0.633654	-0.55507
PIGO	NM_032634	ref|Homo sapiens phosphatidylinositol glycan anchor biosynthesis, class O (PIGO), transcript variant 1, mRNA [NM_032634]	-0.134883	-0.219007	-0.412123
C19orf40	NM_152266	ref|Homo sapiens chromosome 19 open reading frame 40 (C19orf40), mRNA [NM_152266]	0.299049	0.324014	0.685276
UBL5	NM_024292	ref|Homo sapiens ubiquitin-like 5 (UBL5), transcript variant 1, mRNA [NM_024292]	0.182148	0.391463	0.859414
NCAPH2	NM_001185011	ref|Homo sapiens non-SMC condensin II complex, subunit H2 (NCAPH2), transcript variant 3, mRNA [NM_001185011]	-0.0568376	-0.229168	-0.25385
RPLP1	NM_001003	ref|Homo sapiens ribosomal protein, large, P1 (RPLP1), transcript variant 1, mRNA [NM_001003]	0.17515	0.529463	0.59153
IFT20	NM_174887	ref|Homo sapiens intraflagellar transport 20 homolog (Chlamydomonas) (IFT20), mRNA [NM_174887]	0.384903	0.845559	1.31792
ZNF92	NM_007139	ref|Homo sapiens zinc finger protein 92 (ZNF92), transcript variant 1, mRNA [NM_007139]	0.178209	0.332668	1.03333
ERCC5	NM_000123	ref|Homo sapiens excision repair cross-complementing rodent repair deficiency, complementation group 5 (ERCC5), mRNA [NM_000123]	0.194868	0.0328712	0.476213
KIRREL2	NM_199180	ref|Homo sapiens kin of IRRE like 2 (Drosophila) (KIRREL2), transcript variant 3, mRNA [NM_199180]	-0.158255	-0.00266828	-0.0580466
ROR1	NM_005012	ref|Homo sapiens receptor tyrosine kinase-like orphan receptor 1 (ROR1), transcript variant 1, mRNA [NM_005012]	-0.123121	-0.953897	-1.17618
ZNF441	NM_152355	ref|Homo sapiens zinc finger protein 441 (ZNF441), mRNA [NM_152355]	0.189187	0.500585	1.16431
SMCR7L	NM_019008	ref|Homo sapiens Smith-Magenis syndrome chromosome region, candidate 7-like (SMCR7L), mRNA [NM_019008]	0.0913986	0.20775	0.498535
FGFR1OP2	NM_015633	ref|Homo sapiens FGFR1 oncogene partner 2 (FGFR1OP2), transcript variant 1, mRNA [NM_015633]	0.173888	0.252712	0.783041
LBH	NM_030915	ref|Homo sapiens limb bud and heart development homolog (mouse) (LBH), mRNA [NM_030915]	-0.708475	-0.413261	-0.667959
UCA1	NR_015379	ref|Homo sapiens urothelial cancer associated 1 (non-protein coding) (UCA1), non-coding RNA [NR_015379]	0.37256	0.888849	1.28481
PTPN11	NM_002834	ref|Homo sapiens protein tyrosine phosphatase, non-receptor type 11 (PTPN11), mRNA [NM_002834]	0.194391	0.0779617	0.104208
RAD51L1	NM_133509	ref|Homo sapiens RAD51-like 1 (S. cerevisiae) (RAD51L1), transcript variant 3, mRNA [NM_133509]	-0.181033	0.445052	0.311162
EIF2B1	NM_001414	ref|Homo sapiens eukaryotic translation initiation factor 2B, subunit 1 alpha, 26kDa (EIF2B1), mRNA [NM_001414]	0.105342	0.452787	0.670093
TST	NM_003312	ref|Homo sapiens thiosulfate sulfurtransferase (rhodanese) (TST), nuclear gene encoding mitochondrial protein, mRNA [NM_003312]	-0.0931526	0.582972	0.762666
SPTY2D1	NM_194285	ref|Homo sapiens SPT2, Suppressor of Ty, domain containing 1 (S. cerevisiae) (SPTY2D1), mRNA [NM_194285]	0.300941	0.0498639	0.435928
CTPS2	NM_175859	ref|Homo sapiens CTP synthase II (CTPS2), transcript variant 2, mRNA [NM_175859]	-0.255485	-0.778956	-0.868487
GOLGA3	NM_005895	ref|Homo sapiens golgin A3 (GOLGA3), transcript variant 1, mRNA [NM_005895]	-0.037247	-0.200932	-0.742355
LOC100132707	NR_024477	ref|Homo sapiens hypothetical LOC100132707 (LOC100132707), transcript variant 2, non-coding RNA [NR_024477]	0.0866947	0.272623	0.377751
CPPED1	NM_018340	ref|Homo sapiens calcineurin-like phosphoesterase domain containing 1 (CPPED1), transcript variant 1, mRNA [NM_018340]	-0.109857	-1.03069	-1.11509
TDRD7	NM_014290	ref|Homo sapiens tudor domain containing 7 (TDRD7), mRNA [NM_014290]	0.239815	0.677351	0.984327
LRRC16A	NM_017640	ref|Homo sapiens leucine rich repeat containing 16A (LRRC16A), transcript variant 1, mRNA [NM_017640]	-0.199413	-0.494585	-0.650181
COX7A2L	NM_004718	ref|Homo sapiens cytochrome c oxidase subunit VIIa polypeptide 2 like (COX7A2L), nuclear gene encoding mitochondrial protein, mRNA [NM_004718]	0.127582	0.316217	0.569063
INCENP	NM_001040694	ref|Homo sapiens inner centromere protein antigens 135/155kDa (INCENP), transcript variant 1, mRNA [NM_001040694]	0.171395	0.586554	0.742729
SF3B3	NM_012426	ref|Homo sapiens splicing factor 3b, subunit 3, 130kDa (SF3B3), mRNA [NM_012426]	0.0621644	-0.178821	-0.329731
CCDC99	NM_017785	ref|Homo sapiens coiled-coil domain containing 99 (CCDC99), mRNA [NM_017785]	0.169985	0.416666	0.692246
C20orf30	NM_001009924	ref|Homo sapiens chromosome 20 open reading frame 30 (C20orf30), transcript variant 2, mRNA [NM_001009924]	0.182122	0.301915	0.424843
TSPYL1	NM_003309	ref|Homo sapiens TSPY-like 1 (TSPYL1), mRNA [NM_003309]	0.219962	0.0179966	0.651359
ACOX2	NM_003500	ref|Homo sapiens acyl-CoA oxidase 2, branched chain (ACOX2), mRNA [NM_003500]	0.750896	1.01181	1.49692
DYRK1A	NM_130438	ref|Homo sapiens dual-specificity tyrosine-(Y)-phosphorylation regulated kinase 1A (DYRK1A), transcript variant 5, mRNA [NM_130438]	-0.0620624	-0.525417	-0.497555
BCAR1	NM_001170714	ref|Homo sapiens breast cancer anti-estrogen resistance 1 (BCAR1), transcript variant 1, mRNA [NM_001170714]	0.00459513	0.230201	0.445938
KIAA1143	NM_020696	ref|Homo sapiens KIAA1143 (KIAA1143), mRNA [NM_020696]	0.168436	0.045209	0.522462
NMNAT3	NM_178177	ref|Homo sapiens nicotinamide nucleotide adenylyltransferase 3 (NMNAT3), transcript variant 1, mRNA [NM_178177]	-0.596717	-0.762974	-0.953759
ANAPC1	NM_022662	ref|Homo sapiens anaphase promoting complex subunit 1 (ANAPC1), mRNA [NM_022662]	-0.0289602	0.0827646	-0.213104
OTUD6B	NM_016023	ref|Homo sapiens OTU domain containing 6B (OTUD6B), mRNA [NM_016023]	0.0113447	-0.518743	-0.41543
TNXB	NM_032470	ref|Homo sapiens tenascin XB (TNXB), transcript variant XB-S, mRNA [NM_032470]	-0.109796	0.86893	1.28082
C1orf59	NM_144584	ref|Homo sapiens chromosome 1 open reading frame 59 (C1orf59), transcript variant 1, mRNA [NM_144584]	0.0849329	0.254457	0.750975
YY1AP1	NM_139118	ref|Homo sapiens YY1 associated protein 1 (YY1AP1), transcript variant 2, mRNA [NM_139118]	0.0721291	0.571426	0.89169
ACOX2	NM_003500	ref|Homo sapiens acyl-CoA oxidase 2, branched chain (ACOX2), mRNA [NM_003500]	0.717301	1.10026	1.50704
SIAH1	NM_003031	ref|Homo sapiens seven in absentia homolog 1 (Drosophila) (SIAH1), transcript variant 1, mRNA [NM_003031]	0.137296	-0.0361917	0.372135
ZNF320	NM_207333	ref|Homo sapiens zinc finger protein 320 (ZNF320), mRNA [NM_207333]	0.336708	0.517956	0.894614
APTX	NM_175073	ref|Homo sapiens aprataxin (APTX), transcript variant 1, mRNA [NM_175073]	-0.0528378	-0.161889	-0.298512
ATRN	NM_139322	ref|Homo sapiens attractin (ATRN), transcript variant 2, mRNA [NM_139322]	-0.600225	-0.376129	-0.955264
KDM4C	NM_015061	ref|Homo sapiens lysine (K)-specific demethylase 4C (KDM4C), transcript variant 1, mRNA [NM_015061]	-0.199102	-0.615416	-0.966254
TBL1X	NM_005647	ref|Homo sapiens transducin (beta)-like 1X-linked (TBL1X), transcript variant 1, mRNA [NM_005647]	-0.628503	-1.45142	-1.83766
LGTN	NM_006893	ref|Homo sapiens ligatin (LGTN), mRNA [NM_006893]	-0.179874	-0.243842	-0.557014
KIAA1191	NM_020444	ref|Homo sapiens KIAA1191 (KIAA1191), transcript variant 1, mRNA [NM_020444]	0.0662405	0.376444	0.764798
KATNA1	NM_007044	ref|Homo sapiens katanin p60 (ATPase-containing) subunit A 1 (KATNA1), mRNA [NM_007044]	0.189166	0.0660177	0.545834
CYP3A5	NM_001190484	ref|Homo sapiens cytochrome P450, family 3, subfamily A, polypeptide 5 (CYP3A5), transcript variant 2, mRNA [NM_001190484]	0.630104	1.21278	1.79475
ZNF550	NM_001039654	ref|Homo sapiens zinc finger protein 550 (ZNF550), mRNA [NM_001039654]	0.27318	0.239197	0.962593
MPP7	NM_173496	ref|Homo sapiens membrane protein, palmitoylated 7 (MAGUK p55 subfamily member 7) (MPP7), mRNA [NM_173496]	-0.618129	-1.5146	-1.67368
MTHFD1	NM_005956	ref|Homo sapiens methylenetetrahydrofolate dehydrogenase (NADP+ dependent) 1, methenyltetrahydrofolate cyclohydrolase, formyltetrahydrofolate synthetase (MTHFD1), mRNA [NM_005956]	-0.247481	-0.300701	-1.02573
CHIC2	NM_012110	ref|Homo sapiens cysteine-rich hydrophobic domain 2 (CHIC2), mRNA [NM_012110]	0.265858	0.345082	0.476292
FTH1	NM_002032	ref|Homo sapiens ferritin, heavy polypeptide 1 (FTH1), mRNA [NM_002032]	0.174684	0.105873	0.457188
DCUN1D4	NM_001040402	ref|Homo sapiens DCN1, defective in cullin neddylation 1, domain containing 4 (S. cerevisiae) (DCUN1D4), transcript variant 1, mRNA [NM_001040402]	-0.0505043	-0.224683	-0.39023
FMNL2	AK131316	gb|Homo sapiens cDNA FLJ16308 fis, clone PUAEN2006335. [AK131316]	-0.252245	-0.267183	-0.531846
ZRANB3	NM_032143	ref|Homo sapiens zinc finger, RAN-binding domain containing 3 (ZRANB3), mRNA [NM_032143]	-0.460279	-0.584913	-0.882944
SIAH1	NM_003031	ref|Homo sapiens seven in absentia homolog 1 (Drosophila) (SIAH1), transcript variant 1, mRNA [NM_003031]	0.0760557	-0.0727833	0.396334
CRTC2	NM_181715	ref|Homo sapiens CREB regulated transcription coactivator 2 (CRTC2), mRNA [NM_181715]	0.189181	0.444177	0.746681
TBL1Y	NM_033284	ref|Homo sapiens transducin (beta)-like 1, Y-linked (TBL1Y), transcript variant 1, mRNA [NM_033284]	-0.553132	-1.11723	-1.16584
RIN3	NM_024832	ref|Homo sapiens Ras and Rab interactor 3 (RIN3), mRNA [NM_024832]	-0.218944	-0.983113	-0.879384
CALM2	NM_001743	ref|Homo sapiens calmodulin 2 (phosphorylase kinase, delta) (CALM2), mRNA [NM_001743]	0.338124	0.486055	0.851351
BAX	NM_138764	ref|Homo sapiens BCL2-associated X protein (BAX), transcript variant sigma, mRNA [NM_138764]	-0.362099	-0.149453	-0.63333
DDX5	NM_004396	ref|Homo sapiens DEAD (Asp-Glu-Ala-Asp) box polypeptide 5 (DDX5), mRNA [NM_004396]	0.0250116	0.355763	0.386879
APH1A	NM_016022	ref|Homo sapiens anterior pharynx defective 1 homolog A (C. elegans) (APH1A), transcript variant 2, mRNA [NM_016022]	-0.79403	-0.508504	-1.25201
MICAL1	NM_022765	ref|Homo sapiens microtubule associated monoxygenase, calponin and LIM domain containing 1 (MICAL1), transcript variant 1, mRNA [NM_022765]	0.571182	0.655062	1.08005
TSC1	NM_000368	ref|Homo sapiens tuberous sclerosis 1 (TSC1), transcript variant 1, mRNA [NM_000368]	-0.121519	0.533555	0.666973
INCENP	NM_001040694	ref|Homo sapiens inner centromere protein antigens 135/155kDa (INCENP), transcript variant 1, mRNA [NM_001040694]	0.170544	0.594065	0.693382
C1orf50	NM_024097	ref|Homo sapiens chromosome 1 open reading frame 50 (C1orf50), mRNA [NM_024097]	0.0434887	0.523707	0.785927
HERC2	NM_004667	ref|Homo sapiens hect domain and RLD 2 (HERC2), mRNA [NM_004667]	-0.348581	0.134643	-0.251938
PMS2P11	NR_023383	ref|Homo sapiens postmeiotic segregation increased 2 pseudogene 11 (PMS2P11), non-coding RNA [NR_023383]	-0.143964	0.290844	0.32679
PSRC1	NM_032636	ref|Homo sapiens proline/serine-rich coiled-coil 1 (PSRC1), transcript variant 1, mRNA [NM_032636]	-0.491563	-0.488344	-0.573468
NAIP	NM_004536	ref|Homo sapiens NLR family, apoptosis inhibitory protein (NAIP), transcript variant 1, mRNA [NM_004536]	-0.302832	-0.22949	-0.431252
MTERFD3	NM_001033050	ref|Homo sapiens MTERF domain containing 3 (MTERFD3), transcript variant 1, mRNA [NM_001033050]	0.0283492	0.378129	0.47319
EIF2B1	NM_001414	ref|Homo sapiens eukaryotic translation initiation factor 2B, subunit 1 alpha, 26kDa (EIF2B1), mRNA [NM_001414]	0.0680312	0.450623	0.619996
PEX12	NM_000286	ref|Homo sapiens peroxisomal biogenesis factor 12 (PEX12), mRNA [NM_000286]	0.249318	0.134542	0.680836
SRSF11	NM_004768	ref|Homo sapiens serine/arginine-rich splicing factor 11 (SRSF11), transcript variant 1, mRNA [NM_004768]	0.0973184	0.0106826	0.210109
THADA	NM_022065	ref|Homo sapiens thyroid adenoma associated (THADA), transcript variant 1, mRNA [NM_022065]	-0.237642	-0.463389	-0.956708
PHLDB2	NM_001134438	ref|Homo sapiens pleckstrin homology-like domain, family B, member 2 (PHLDB2), transcript variant 1, mRNA [NM_001134438]	0.625358	-0.0136184	-0.23208
ZYX	NM_003461	ref|Homo sapiens zyxin (ZYX), transcript variant 1, mRNA [NM_003461]	-0.0973881	-0.653579	-0.810247
HN1	NM_001002033	ref|Homo sapiens hematological and neurological expressed 1 (HN1), transcript variant 3, mRNA [NM_001002033]	0.273682	0.294306	0.722802
FAM81A	NM_152450	ref|Homo sapiens family with sequence similarity 81, member A (FAM81A), mRNA [NM_152450]	0.296564	0.696043	0.682295
WAPAL	NM_015045	ref|Homo sapiens wings apart-like homolog (Drosophila) (WAPAL), mRNA [NM_015045]	-0.171621	-0.211782	-0.650207
PHF14	NM_014660	ref|Homo sapiens PHD finger protein 14 (PHF14), transcript variant 2, mRNA [NM_014660]	-0.201197	-0.494	-0.43749
ZNF684	NM_152373	ref|Homo sapiens zinc finger protein 684 (ZNF684), mRNA [NM_152373]	0.320516	0.395968	0.735558
KLHDC2	NM_014315	ref|Homo sapiens kelch domain containing 2 (KLHDC2), mRNA [NM_014315]	0.0978889	0.613172	0.845925
PPP1R9B	NM_032595	ref|Homo sapiens protein phosphatase 1, regulatory (inhibitor) subunit 9B (PPP1R9B), mRNA [NM_032595]	0.0788493	0.265152	0.363458
AZI1	NM_014984	ref|Homo sapiens 5-azacytidine induced 1 (AZI1), transcript variant 1, mRNA [NM_014984]	-0.00155975	0.409347	0.566466
CNNM4	NM_020184	ref|Homo sapiens cyclin M4 (CNNM4), mRNA [NM_020184]	0.247202	0.990504	1.37389
A_24_P739582	A_24_P739582	Unknown	-0.0886182	-0.335411	-0.47159
MED26	NM_004831	ref|Homo sapiens mediator complex subunit 26 (MED26), mRNA [NM_004831]	0.167213	0.51336	0.760224
VPRBP	NM_014703	ref|Homo sapiens Vpr (HIV-1) binding protein (VPRBP), transcript variant 1, mRNA [NM_014703]	-0.296892	-0.242075	-0.567595
PRKAB2	NM_005399	ref|Homo sapiens protein kinase, AMP-activated, beta 2 non-catalytic subunit (PRKAB2), mRNA [NM_005399]	0.264227	0.463746	0.938632
RNF34	NM_194271	ref|Homo sapiens ring finger protein 34 (RNF34), transcript variant 1, mRNA [NM_194271]	-0.0133263	0.380948	0.497609
PRR11	NM_018304	ref|Homo sapiens proline rich 11 (PRR11), mRNA [NM_018304]	-0.459122	-0.78602	-1.08822
LGTN	NM_006893	ref|Homo sapiens ligatin (LGTN), mRNA [NM_006893]	-0.189705	-0.270539	-0.526453
INCENP	NM_001040694	ref|Homo sapiens inner centromere protein antigens 135/155kDa (INCENP), transcript variant 1, mRNA [NM_001040694]	0.184205	0.623927	0.758355
BRMS1	NM_001024957	ref|Homo sapiens breast cancer metastasis suppressor 1 (BRMS1), transcript variant 2, mRNA [NM_001024957]	0.0498261	0.167507	0.53531
SGOL2	NM_152524	ref|Homo sapiens shugoshin-like 2 (S. pombe) (SGOL2), transcript variant 1, mRNA [NM_152524]	0.0450862	0.107601	0.378581
CCNDBP1	NM_012142	ref|Homo sapiens cyclin D-type binding-protein 1 (CCNDBP1), transcript variant 1, mRNA [NM_012142]	0.3003	0.204912	0.70644
ACRC	NM_052957	ref|Homo sapiens acidic repeat containing (ACRC), mRNA [NM_052957]	2.65053	0.44113	3.37098
ATRX	NM_000489	ref|Homo sapiens alpha thalassemia/mental retardation syndrome X-linked (ATRX), transcript variant 1, mRNA [NM_000489]	-0.118882	-0.0958115	-0.374024
SLC27A2	NM_003645	ref|Homo sapiens solute carrier family 27 (fatty acid transporter), member 2 (SLC27A2), transcript variant 1, mRNA [NM_003645]	-0.697462	0.00373035	-1.34462
ERC1	NM_178040	ref|Homo sapiens ELKS/RAB6-interacting/CAST family member 1 (ERC1), transcript variant epsilon, mRNA [NM_178040]	-0.414469	-1.0162	-0.575977
HERC2	NM_004667	ref|Homo sapiens hect domain and RLD 2 (HERC2), mRNA [NM_004667]	-0.351702	-0.621833	-0.800086
AARSD1	NM_025267	ref|Homo sapiens alanyl-tRNA synthetase domain containing 1 (AARSD1), transcript variant 2, mRNA [NM_025267]	-0.202243	-0.273853	-0.600192
ZMYM4	NM_005095	ref|Homo sapiens zinc finger, MYM-type 4 (ZMYM4), mRNA [NM_005095]	-0.058783	-0.228649	-0.518491
PMS2	NM_000535	ref|Homo sapiens PMS2 postmeiotic segregation increased 2 (S. cerevisiae) (PMS2), transcript variant 1, mRNA [NM_000535]	-0.15858	0.27456	0.385125
RBM14-RBM4	NM_001198845	ref|Homo sapiens RBM14-RBM4 read-through (RBM14-RBM4), transcript variant 1, mRNA [NM_001198845]	0.057863	0.347735	0.801954
EIF2C3	NM_024852	ref|Homo sapiens eukaryotic translation initiation factor 2C, 3 (EIF2C3), transcript variant 1, mRNA [NM_024852]	0.0800411	0.338126	0.666078
ARHGAP19	NM_032900	ref|Homo sapiens Rho GTPase activating protein 19 (ARHGAP19), mRNA [NM_032900]	-0.160644	-0.654962	-0.474859
H3F3A	NM_002107	ref|Homo sapiens H3 histone, family 3A (H3F3A), mRNA [NM_002107]	-0.0121214	0.241054	0.397509
VPRBP	NM_014703	ref|Homo sapiens Vpr (HIV-1) binding protein (VPRBP), transcript variant 1, mRNA [NM_014703]	-0.365101	-0.715555	-0.85181
MTHFD1	NM_005956	ref|Homo sapiens methylenetetrahydrofolate dehydrogenase (NADP+ dependent) 1, methenyltetrahydrofolate cyclohydrolase, formyltetrahydrofolate synthetase (MTHFD1), mRNA [NM_005956]	-0.245993	-0.321559	-1.00929
LGTN	NM_006893	ref|Homo sapiens ligatin (LGTN), mRNA [NM_006893]	-0.163809	-0.308163	-0.505037
RG9MTD2	NM_152292	ref|Homo sapiens RNA (guanine-9-) methyltransferase domain containing 2 (RG9MTD2), transcript variant 1, mRNA [NM_152292]	0.565911	-0.260035	-0.113097
ROR1	NM_005012	ref|Homo sapiens receptor tyrosine kinase-like orphan receptor 1 (ROR1), transcript variant 1, mRNA [NM_005012]	-0.206717	-0.875904	-1.20172
SNRPD1	NM_006938	ref|Homo sapiens small nuclear ribonucleoprotein D1 polypeptide 16kDa (SNRPD1), mRNA [NM_006938]	-0.0571356	-0.419204	-0.38978
PIGP	NM_153681	ref|Homo sapiens phosphatidylinositol glycan anchor biosynthesis, class P (PIGP), transcript variant 1, mRNA [NM_153681]	0.246856	0.492978	0.547298
BAZ2A	NM_013449	ref|Homo sapiens bromodomain adjacent to zinc finger domain, 2A (BAZ2A), mRNA [NM_013449]	0.0974854	0.481288	0.602745
COMMD1	NM_152516	ref|Homo sapiens copper metabolism (Murr1) domain containing 1 (COMMD1), mRNA [NM_152516]	-0.243576	-0.5974	-0.840941
TMBIM4	NM_016056	ref|Homo sapiens transmembrane BAX inhibitor motif containing 4 (TMBIM4), mRNA [NM_016056]	-0.116586	-0.48854	-0.57398
DNAJC11	NM_018198	ref|Homo sapiens DnaJ (Hsp40) homolog, subfamily C, member 11 (DNAJC11), mRNA [NM_018198]	-0.24929	-0.172396	-0.327675
BAX	NM_138764	ref|Homo sapiens BCL2-associated X protein (BAX), transcript variant sigma, mRNA [NM_138764]	-0.341465	-0.145047	-0.620781
SPATS2L	NM_001100422	ref|Homo sapiens spermatogenesis associated, serine-rich 2-like (SPATS2L), transcript variant 2, mRNA [NM_001100422]	-0.0337787	-0.558809	-0.666721
ALG3	NM_005787	ref|Homo sapiens asparagine-linked glycosylation 3, alpha-1,3- mannosyltransferase homolog (S. cerevisiae) (ALG3), transcript variant 1, mRNA [NM_005787]	0.0923006	0.215276	0.425284
ZNF684	NM_152373	ref|Homo sapiens zinc finger protein 684 (ZNF684), mRNA [NM_152373]	0.172158	0.372085	0.878841
SNRPF	NM_003095	ref|Homo sapiens small nuclear ribonucleoprotein polypeptide F (SNRPF), mRNA [NM_003095]	-0.165616	-0.393458	-0.60007
LOC550112	NR_015439	ref|Homo sapiens hypothetical LOC550112 (LOC550112), non-coding RNA [NR_015439]	0.451283	0.901687	0.881972
REEP2	NM_016606	ref|Homo sapiens receptor accessory protein 2 (REEP2), mRNA [NM_016606]	0.10769	0.57282	0.621962
ROR1	NM_005012	ref|Homo sapiens receptor tyrosine kinase-like orphan receptor 1 (ROR1), transcript variant 1, mRNA [NM_005012]	-0.166766	-0.939827	-1.29556
ERCC5	NM_000123	ref|Homo sapiens excision repair cross-complementing rodent repair deficiency, complementation group 5 (ERCC5), mRNA [NM_000123]	0.191922	0.119056	0.522683
DMTF1	NM_021145	ref|Homo sapiens cyclin D binding myb-like transcription factor 1 (DMTF1), transcript variant 1, mRNA [NM_021145]	0.233555	0.401931	0.511795
MAP3K4	NM_006724	ref|Homo sapiens mitogen-activated protein kinase kinase kinase 4 (MAP3K4), transcript variant 2, mRNA [NM_006724]	-0.221624	-0.701914	-0.767953
ABTB1	NM_172027	ref|Homo sapiens ankyrin repeat and BTB (POZ) domain containing 1 (ABTB1), transcript variant 2, mRNA [NM_172027]	-0.0877257	0.0462957	0.16787
ZMYM4	NM_005095	ref|Homo sapiens zinc finger, MYM-type 4 (ZMYM4), mRNA [NM_005095]	0.0140492	-0.165413	-0.508307
NDST2	BC018681	gb|Homo sapiens N-deacetylase/N-sulfotransferase (heparan glucosaminyl) 2, mRNA (cDNA clone IMAGE:4665687). [BC018681]	0.152417	0.500805	0.831968
PNPT1	NM_033109	ref|Homo sapiens polyribonucleotide nucleotidyltransferase 1 (PNPT1), mRNA [NM_033109]	0.00723691	-0.361449	-0.513
KRT83	NM_002282	ref|Homo sapiens keratin 83 (KRT83), mRNA [NM_002282]	-0.0507277	-0.701665	-0.937132
TTC9C	NM_173810	ref|Homo sapiens tetratricopeptide repeat domain 9C (TTC9C), mRNA [NM_173810]	0.132525	0.532406	0.910698
FBXL17	BC063316	gb|Homo sapiens F-box and leucine-rich repeat protein 17, mRNA (cDNA clone IMAGE:30341140), with apparent retained intron. [BC063316]	-0.0755238	0.243056	-0.175518
PALLD	NM_016081	ref|Homo sapiens palladin, cytoskeletal associated protein (PALLD), transcript variant 2, mRNA [NM_016081]	0.425421	0.265668	0.522058
TP53INP1	NM_033285	ref|Homo sapiens tumor protein p53 inducible nuclear protein 1 (TP53INP1), transcript variant 1, mRNA [NM_033285]	0.258756	1.5104	1.31339
ENST00000435388	ENST00000435388	Unknown	0.45133	1.2601	1.29367
CCDC136	NM_022742	ref|Homo sapiens coiled-coil domain containing 136 (CCDC136), mRNA [NM_022742]	0.230723	0.846709	1.26021
EGFR	NM_005228	ref|Homo sapiens epidermal growth factor receptor (EGFR), transcript variant 1, mRNA [NM_005228]	0.211712	-0.358918	-0.400005
POLR2F	NM_021974	ref|Homo sapiens polymerase (RNA) II (DNA directed) polypeptide F (POLR2F), mRNA [NM_021974]	0.114905	0.249168	0.440484
ADARB1	NR_027673	ref|Homo sapiens adenosine deaminase, RNA-specific, B1 (ADARB1), transcript variant 4, non-coding RNA [NR_027673]	-0.162649	-0.344727	-0.450633
RDH10	NM_172037	ref|Homo sapiens retinol dehydrogenase 10 (all-trans) (RDH10), mRNA [NM_172037]	0.485187	0.54144	0.98987
LOC651337	AK124119	gb|Homo sapiens cDNA FLJ42125 fis, clone TESTI2009511. [AK124119]	-0.477553	-0.376234	-0.892763
SMYD4	NM_052928	ref|Homo sapiens SET and MYND domain containing 4 (SMYD4), mRNA [NM_052928]	-0.0767797	0.638149	0.662924
RNF19B	NM_153341	ref|Homo sapiens ring finger protein 19B (RNF19B), transcript variant 1, mRNA [NM_153341]	0.251388	0.332309	0.558904
BCL2	NM_000657	ref|Homo sapiens B-cell CLL/lymphoma 2 (BCL2), nuclear gene encoding mitochondrial protein, transcript variant beta, mRNA [NM_000657]	-0.192306	-0.351176	-0.40063
TOMM40	NM_006114	ref|Homo sapiens translocase of outer mitochondrial membrane 40 homolog (yeast) (TOMM40), nuclear gene encoding mitochondrial protein, transcript variant 3, mRNA [NM_006114]	-0.224249	-0.516041	-0.617936
LFNG	NM_001040167	ref|Homo sapiens LFNG O-fucosylpeptide 3-beta-N-acetylglucosaminyltransferase (LFNG), transcript variant 1, mRNA [NM_001040167]	0.289373	0.268459	0.869649
FEN1	NM_004111	ref|Homo sapiens flap structure-specific endonuclease 1 (FEN1), mRNA [NM_004111]	-0.162521	-0.148734	-0.427103
MTHFD1	NM_005956	ref|Homo sapiens methylenetetrahydrofolate dehydrogenase (NADP+ dependent) 1, methenyltetrahydrofolate cyclohydrolase, formyltetrahydrofolate synthetase (MTHFD1), mRNA [NM_005956]	-0.238845	-0.3215	-1.00295
ZNF253	NM_021047	ref|Homo sapiens zinc finger protein 253 (ZNF253), mRNA [NM_021047]	0.117251	0.736535	0.947213
A_33_P3221980	A_33_P3221980	Unknown	-0.103343	-0.518056	-0.937616
BACE1	NM_012104	ref|Homo sapiens beta-site APP-cleaving enzyme 1 (BACE1), transcript variant a, mRNA [NM_012104]	-0.0682454	0.339069	0.190144
EGR1	NM_001964	ref|Homo sapiens early growth response 1 (EGR1), mRNA [NM_001964]	-0.126521	-0.813061	-1.5293
DOCK7	NM_033407	ref|Homo sapiens dedicator of cytokinesis 7 (DOCK7), mRNA [NM_033407]	-0.0418686	-0.424004	-0.562931
CCS	NM_005125	ref|Homo sapiens copper chaperone for superoxide dismutase (CCS), mRNA [NM_005125]	0.028288	0.440241	0.628607
EVI5	NM_005665	ref|Homo sapiens ecotropic viral integration site 5 (EVI5), mRNA [NM_005665]	0.0817641	-0.14127	-0.59097
N4BP2L1	NM_052818	ref|Homo sapiens NEDD4 binding protein 2-like 1 (N4BP2L1), transcript variant 1, mRNA [NM_052818]	-0.0578706	0.821225	1.55726
UBAC2	NM_177967	ref|Homo sapiens UBA domain containing 2 (UBAC2), transcript variant 2, mRNA [NM_177967]	-0.152512	-0.591536	-1.18774
CTPS2	NM_001144002	ref|Homo sapiens CTP synthase II (CTPS2), transcript variant 3, mRNA [NM_001144002]	-0.208526	0.211083	-0.220054
BIVM	NM_017693	ref|Homo sapiens basic, immunoglobulin-like variable motif containing (BIVM), transcript variant 1, mRNA [NM_017693]	-0.00451665	-0.0875817	-0.5206
MRPS11	NM_022839	ref|Homo sapiens mitochondrial ribosomal protein S11 (MRPS11), nuclear gene encoding mitochondrial protein, transcript variant 1, mRNA [NM_022839]	0.0828466	0.259509	0.536706
C6orf1	NM_178508	ref|Homo sapiens chromosome 6 open reading frame 1 (C6orf1), transcript variant 1, mRNA [NM_178508]	-0.0539997	-0.0159674	0.751679
HIST1H4B	NM_003544	ref|Homo sapiens histone cluster 1, H4b (HIST1H4B), mRNA [NM_003544]	-0.302147	-1.56798	-1.86457
RRAGC	NM_022157	ref|Homo sapiens Ras-related GTP binding C (RRAGC), mRNA [NM_022157]	-0.00898328	0.349155	0.604093
ERC1	NM_178040	ref|Homo sapiens ELKS/RAB6-interacting/CAST family member 1 (ERC1), transcript variant epsilon, mRNA [NM_178040]	-0.235295	-0.463271	-1.04079
TMEM85	NM_016454	ref|Homo sapiens transmembrane protein 85 (TMEM85), mRNA [NM_016454]	0.0212685	0.101609	0.229754
STAT6	NM_003153	ref|Homo sapiens signal transducer and activator of transcription 6, interleukin-4 induced (STAT6), transcript variant 2, mRNA [NM_003153]	0.291377	0.433128	0.595364
PMS2P5	NR_027776	ref|Homo sapiens postmeiotic segregation increased 2 pseudogene 5 (PMS2P5), transcript variant 2, non-coding RNA [NR_027776]	-0.116893	0.349995	0.524112
NCBP2	NM_007362	ref|Homo sapiens nuclear cap binding protein subunit 2, 20kDa (NCBP2), transcript variant 1, mRNA [NM_007362]	0.369564	0.0268541	0.776742
ROMO1	NM_080748	ref|Homo sapiens reactive oxygen species modulator 1 (ROMO1), nuclear gene encoding mitochondrial protein, mRNA [NM_080748]	0.17844	0.723679	0.926802
ALPPL2	NM_031313	ref|Homo sapiens alkaline phosphatase, placental-like 2 (ALPPL2), mRNA [NM_031313]	0.384083	1.92307	1.95585
H3F3A	NM_002107	ref|Homo sapiens H3 histone, family 3A (H3F3A), mRNA [NM_002107]	0.0813689	0.522734	0.770195
NUDT4	NM_199040	ref|Homo sapiens nudix (nucleoside diphosphate linked moiety X)-type motif 4 (NUDT4), transcript variant 2, mRNA [NM_199040]	0.211747	0.421587	0.69948
LGALS9C	NM_001040078	ref|Homo sapiens lectin, galactoside-binding, soluble, 9C (LGALS9C), mRNA [NM_001040078]	0.147913	0.243405	0.674009
BMS1	NM_014753	ref|Homo sapiens BMS1 homolog, ribosome assembly protein (yeast) (BMS1), mRNA [NM_014753]	-0.017241	-0.461613	-0.509775
SELK	NM_021237	ref|Homo sapiens selenoprotein K (SELK), mRNA [NM_021237]	0.162669	0.194192	0.469136
KLC2	NM_022822	ref|Homo sapiens kinesin light chain 2 (KLC2), transcript variant 1, mRNA [NM_022822]	-0.0566099	-0.185052	0.0178493
AARSD1	NM_025267	ref|Homo sapiens alanyl-tRNA synthetase domain containing 1 (AARSD1), transcript variant 2, mRNA [NM_025267]	-0.157877	-0.289073	-0.653579
CTPS2	NM_175859	ref|Homo sapiens CTP synthase II (CTPS2), transcript variant 2, mRNA [NM_175859]	-0.291283	-0.638402	-0.910199
CCNJL	NM_024565	ref|Homo sapiens cyclin J-like (CCNJL), mRNA [NM_024565]	0.0419338	-0.381134	-0.437076
TCEAL5	NM_001012979	ref|Homo sapiens transcription elongation factor A (SII)-like 5 (TCEAL5), mRNA [NM_001012979]	0.866681	0.563845	1.14851
BMP8B	NM_001720	ref|Homo sapiens bone morphogenetic protein 8b (BMP8B), mRNA [NM_001720]	-0.227527	0.447672	0.0157219
TUSC2	NM_007275	ref|Homo sapiens tumor suppressor candidate 2 (TUSC2), mRNA [NM_007275]	0.131765	0.298069	0.557838
TKT	NM_001064	ref|Homo sapiens transketolase (TKT), transcript variant 1, mRNA [NM_001064]	-0.351849	0.0310999	-0.79419
UIMC1	NM_016290	ref|Homo sapiens ubiquitin interaction motif containing 1 (UIMC1), transcript variant 2, mRNA [NM_016290]	-0.161971	-0.0601074	-0.42016
FANCA	NM_000135	ref|Homo sapiens Fanconi anemia, complementation group A (FANCA), transcript variant 1, mRNA [NM_000135]	-0.0564426	0.43363	-0.0225254
ATP6V1G1	NM_004888	ref|Homo sapiens ATPase, H+ transporting, lysosomal 13kDa, V1 subunit G1 (ATP6V1G1), mRNA [NM_004888]	0.136182	0.434459	0.760353
TMEM85	NM_016454	ref|Homo sapiens transmembrane protein 85 (TMEM85), mRNA [NM_016454]	0.0442559	0.0878996	0.244266
ZFAND3	NM_021943	ref|Homo sapiens zinc finger, AN1-type domain 3 (ZFAND3), mRNA [NM_021943]	-0.196617	-0.773198	-0.979584
SNRPF	NM_003095	ref|Homo sapiens small nuclear ribonucleoprotein polypeptide F (SNRPF), mRNA [NM_003095]	-0.140672	-0.400296	-0.595123
ZFAND3	NM_021943	ref|Homo sapiens zinc finger, AN1-type domain 3 (ZFAND3), mRNA [NM_021943]	-0.160702	-0.82793	-1.05201
TBL1Y	NM_033284	ref|Homo sapiens transducin (beta)-like 1, Y-linked (TBL1Y), transcript variant 1, mRNA [NM_033284]	-0.440797	-1.21975	-1.30589
TDRD7	NM_014290	ref|Homo sapiens tudor domain containing 7 (TDRD7), mRNA [NM_014290]	0.302715	0.53542	0.922836
APH1A	NM_001077628	ref|Homo sapiens anterior pharynx defective 1 homolog A (C. elegans) (APH1A), transcript variant 1, mRNA [NM_001077628]	-0.0423439	0.155498	-0.0824479
ZNF160	BC000807	gb|Homo sapiens zinc finger protein 160, mRNA (cDNA clone IMAGE:3452857), complete cds. [BC000807]	0.156979	0.250001	0.511069
PHLDB2	BC038806	gb|Homo sapiens pleckstrin homology-like domain, family B, member 2, mRNA (cDNA clone IMAGE:5169755), complete cds. [BC038806]	0.214902	0.817677	1.00673
HNRNPU	NM_031844	ref|Homo sapiens heterogeneous nuclear ribonucleoprotein U (scaffold attachment factor A) (HNRNPU), transcript variant 1, mRNA [NM_031844]	0.00242085	-0.42183	-0.425695
SNRPD1	NM_006938	ref|Homo sapiens small nuclear ribonucleoprotein D1 polypeptide 16kDa (SNRPD1), mRNA [NM_006938]	-0.0452291	-0.351919	-0.389128
CASP4	NM_033306	ref|Homo sapiens caspase 4, apoptosis-related cysteine peptidase (CASP4), transcript variant gamma, mRNA [NM_033306]	0.316123	0.747108	0.914584
SMC6	NM_024624	ref|Homo sapiens structural maintenance of chromosomes 6 (SMC6), transcript variant 2, mRNA [NM_024624]	0.479547	0.272905	0.441534
DNAJC11	NM_018198	ref|Homo sapiens DnaJ (Hsp40) homolog, subfamily C, member 11 (DNAJC11), mRNA [NM_018198]	-0.130533	-0.169401	-0.683642
RABGAP1	NM_012197	ref|Homo sapiens RAB GTPase activating protein 1 (RABGAP1), mRNA [NM_012197]	-0.0872677	-0.263543	-0.398257
PRDM2	NM_015866	ref|Homo sapiens PR domain containing 2, with ZNF domain (PRDM2), transcript variant 2, mRNA [NM_015866]	0.310195	0.383542	0.496743
SRSF11	NM_004768	ref|Homo sapiens serine/arginine-rich splicing factor 11 (SRSF11), transcript variant 1, mRNA [NM_004768]	0.218788	0.204473	0.483095
BLVRA	NM_000712	ref|Homo sapiens biliverdin reductase A (BLVRA), mRNA [NM_000712]	-0.292006	-0.279214	-0.529891
ZNF701	NM_001172655	ref|Homo sapiens zinc finger protein 701 (ZNF701), transcript variant 1, mRNA [NM_001172655]	0.0691432	0.436247	0.875598
ENST00000368053	ENST00000368053	ens|mediator complex subunit 23 [Source:HGNC Symbol;Acc:2372] [ENST00000368053]	0.138068	0.177824	0.505859
KLC2	NM_001134774	ref|Homo sapiens kinesin light chain 2 (KLC2), transcript variant 2, mRNA [NM_001134774]	0.139478	-0.362429	0.123975
LRRC16A	NM_001173977	ref|Homo sapiens leucine rich repeat containing 16A (LRRC16A), transcript variant 2, mRNA [NM_001173977]	-0.0859297	-0.319986	-0.578079
LOC642852	NR_026943	ref|Homo sapiens hypothetical LOC642852 (LOC642852), non-coding RNA [NR_026943]	-0.186944	0.221056	0.353053
PCOLCE	NM_002593	ref|Homo sapiens procollagen C-endopeptidase enhancer (PCOLCE), mRNA [NM_002593]	0.473054	0.282598	0.824683
A_33_P3340624	A_33_P3340624	Unknown	0.0304866	0.389316	0.540739
PDGFA	NM_002607	ref|Homo sapiens platelet-derived growth factor alpha polypeptide (PDGFA), transcript variant 1, mRNA [NM_002607]	-0.224079	-0.405226	-0.350528
UQCR11	NM_006830	ref|Homo sapiens ubiquinol-cytochrome c reductase, complex III subunit XI (UQCR11), nuclear gene encoding mitochondrial protein, mRNA [NM_006830]	0.179319	0.509518	0.608286
LARS	NM_020117	ref|Homo sapiens leucyl-tRNA synthetase (LARS), mRNA [NM_020117]	-0.195818	-0.146826	-0.541106
RPL21	NM_000982	ref|Homo sapiens ribosomal protein L21 (RPL21), mRNA [NM_000982]	0.0494369	0.142885	0.295635
DEF8	NM_017702	ref|Homo sapiens differentially expressed in FDCP 8 homolog (mouse) (DEF8), transcript variant 2, mRNA [NM_017702]	0.187182	0.138245	0.37609
CLEC16A	NM_015226	ref|Homo sapiens C-type lectin domain family 16, member A (CLEC16A), mRNA [NM_015226]	-0.572047	-0.424649	-1.13062
MRFAP1	NM_033296	ref|Homo sapiens Mof4 family associated protein 1 (MRFAP1), mRNA [NM_033296]	-0.101905	-0.421869	-0.396422
GCH1	CR589979	gb|full-length cDNA clone CS0DC027YK01 of Neuroblastoma Cot 25-normalized of Homo sapiens (human). [CR589979]	0.159642	0.362029	0.107039
E2F5	NM_001951	ref|Homo sapiens E2F transcription factor 5, p130-binding (E2F5), transcript variant 1, mRNA [NM_001951]	-0.0411918	-0.447653	-0.68873
ARHGEF7	NM_003899	ref|Homo sapiens Rho guanine nucleotide exchange factor (GEF) 7 (ARHGEF7), transcript variant 1, mRNA [NM_003899]	-0.0820988	0.00477796	-0.20576
TPX2	NM_012112	ref|Homo sapiens TPX2, microtubule-associated, homolog (Xenopus laevis) (TPX2), mRNA [NM_012112]	-0.104542	-0.346293	-0.524102
PPIAL4A	NM_178230	ref|Homo sapiens peptidylprolyl isomerase A (cyclophilin A)-like 4A (PPIAL4A), mRNA [NM_178230]	-0.160005	-0.329813	-0.585443
TMEM85	NM_016454	ref|Homo sapiens transmembrane protein 85 (TMEM85), mRNA [NM_016454]	0.024033	0.123449	0.243565
LBH	NM_030915	ref|Homo sapiens limb bud and heart development homolog (mouse) (LBH), mRNA [NM_030915]	-0.197249	0.272344	0.200825
CTPS2	NM_175859	ref|Homo sapiens CTP synthase II (CTPS2), transcript variant 2, mRNA [NM_175859]	-0.368093	-0.65488	-0.961423
ERGIC1	NM_001031711	ref|Homo sapiens endoplasmic reticulum-golgi intermediate compartment (ERGIC) 1 (ERGIC1), mRNA [NM_001031711]	-0.422167	-0.497239	-0.860347
COQ5	NM_032314	ref|Homo sapiens coenzyme Q5 homolog, methyltransferase (S. cerevisiae) (COQ5), nuclear gene encoding mitochondrial protein, mRNA [NM_032314]	-0.347003	-0.558484	-0.746817
ABLIM1	NM_001003408	ref|Homo sapiens actin binding LIM protein 1 (ABLIM1), transcript variant 3, mRNA [NM_001003408]	-0.139192	-0.282257	-0.628523
KDM4C	NM_001146694	ref|Homo sapiens lysine (K)-specific demethylase 4C (KDM4C), transcript variant 2, mRNA [NM_001146694]	-0.0495024	-0.584459	-0.629332
FIG4	NM_014845	ref|Homo sapiens FIG4 homolog, SAC1 lipid phosphatase domain containing (S. cerevisiae) (FIG4), mRNA [NM_014845]	-0.0559527	-0.315704	-0.638839
PIH1D2	NM_138789	ref|Homo sapiens PIH1 domain containing 2 (PIH1D2), transcript variant 1, mRNA [NM_138789]	0.179886	0.46015	0.520439
IFI35	NM_005533	ref|Homo sapiens interferon-induced protein 35 (IFI35), mRNA [NM_005533]	0.117176	0.482507	0.751661
WDR24	ENST00000293883	ens|WD repeat domain 24 [Source:HGNC Symbol;Acc:20852] [ENST00000293883]	-0.0819311	0.261649	0.569473
MRPS27	NM_015084	ref|Homo sapiens mitochondrial ribosomal protein S27 (MRPS27), nuclear gene encoding mitochondrial protein, mRNA [NM_015084]	-0.233122	-0.575288	-0.844955
USP9X	NM_001039590	ref|Homo sapiens ubiquitin specific peptidase 9, X-linked (USP9X), transcript variant 3, mRNA [NM_001039590]	-0.390485	-0.303569	-0.827847
NUDT4	NM_199040	ref|Homo sapiens nudix (nucleoside diphosphate linked moiety X)-type motif 4 (NUDT4), transcript variant 2, mRNA [NM_199040]	0.0469457	0.313867	0.496677
A_33_P3256660	A_33_P3256660	Unknown	-0.202197	-0.282109	-0.623686
KRTAP4-1	NM_033060	ref|Homo sapiens keratin associated protein 4-1 (KRTAP4-1), mRNA [NM_033060]	0.163877	1.22987	1.4064
LCLAT1	NM_182551	ref|Homo sapiens lysocardiolipin acyltransferase 1 (LCLAT1), transcript variant 1, mRNA [NM_182551]	0.0168031	0.0167626	-0.472579
P4HA2	NM_001017973	ref|Homo sapiens prolyl 4-hydroxylase, alpha polypeptide II (P4HA2), transcript variant 2, mRNA [NM_001017973]	0.199447	-0.0517671	-0.179673
MSL2	NM_018133	ref|Homo sapiens male-specific lethal 2 homolog (Drosophila) (MSL2), transcript variant 1, mRNA [NM_018133]	-0.140527	-0.378503	-0.355093
A_33_P3303430	A_33_P3303430	Unknown	-0.0509517	-0.481376	-0.623234
GPAA1	NM_003801	ref|Homo sapiens glycosylphosphatidylinositol anchor attachment protein 1 homolog (yeast) (GPAA1), mRNA [NM_003801]	-0.276405	-0.210756	-0.137813
CDC42BPA	NM_003607	ref|Homo sapiens CDC42 binding protein kinase alpha (DMPK-like) (CDC42BPA), transcript variant B, mRNA [NM_003607]	-0.0460274	-0.210986	-0.630032
GCH1	NM_001024071	ref|Homo sapiens GTP cyclohydrolase 1 (GCH1), transcript variant 4, mRNA [NM_001024071]	0.253706	0.225079	0.595096
CDYL	NM_004824	ref|Homo sapiens chromodomain protein, Y-like (CDYL), transcript variant 1, mRNA [NM_004824]	-0.057725	-0.111686	-0.409329
USP34	NM_014709	ref|Homo sapiens ubiquitin specific peptidase 34 (USP34), mRNA [NM_014709]	-0.157857	-0.425826	-0.842555
NAGLU	NM_000263	ref|Homo sapiens N-acetylglucosaminidase, alpha (NAGLU), mRNA [NM_000263]	-0.492656	-0.377679	-0.530802
PRDX1	NM_002574	ref|Homo sapiens peroxiredoxin 1 (PRDX1), transcript variant 1, mRNA [NM_002574]	0.227258	0.429693	0.667808
ATL3	NM_015459	ref|Homo sapiens atlastin GTPase 3 (ATL3), mRNA [NM_015459]	0.258029	-0.0215167	0.551481
KDM4C	NM_015061	ref|Homo sapiens lysine (K)-specific demethylase 4C (KDM4C), transcript variant 1, mRNA [NM_015061]	-0.273883	-0.556745	-0.874356
C12orf41	NM_017822	ref|Homo sapiens chromosome 12 open reading frame 41 (C12orf41), mRNA [NM_017822]	-0.0188295	0.186665	0.43497
AARSD1	NM_025267	ref|Homo sapiens alanyl-tRNA synthetase domain containing 1 (AARSD1), transcript variant 2, mRNA [NM_025267]	-0.171341	-0.310506	-0.624475
RPS5	NM_001009	ref|Homo sapiens ribosomal protein S5 (RPS5), mRNA [NM_001009]	0.214881	0.531931	0.49677
EIF1B	NM_005875	ref|Homo sapiens eukaryotic translation initiation factor 1B (EIF1B), mRNA [NM_005875]	0.237645	0.183715	0.726765
CCDC99	NM_017785	ref|Homo sapiens coiled-coil domain containing 99 (CCDC99), mRNA [NM_017785]	0.242365	0.354877	0.692037
AIG1	NM_016108	ref|Homo sapiens androgen-induced 1 (AIG1), mRNA [NM_016108]	-0.160764	-0.323593	-0.840431
ICAM1	NM_000201	ref|Homo sapiens intercellular adhesion molecule 1 (ICAM1), mRNA [NM_000201]	0.139532	0.364569	0.375158
PIP5K1B	NM_003558	ref|Homo sapiens phosphatidylinositol-4-phosphate 5-kinase, type I, beta (PIP5K1B), transcript variant 2, mRNA [NM_003558]	0.14755	-0.243762	-0.687361
PTPN11	NM_002834	ref|Homo sapiens protein tyrosine phosphatase, non-receptor type 11 (PTPN11), mRNA [NM_002834]	0.190689	0.107463	0.084951
HN1	NM_001002033	ref|Homo sapiens hematological and neurological expressed 1 (HN1), transcript variant 3, mRNA [NM_001002033]	0.229811	0.296738	0.674649
APH1A	NM_016022	ref|Homo sapiens anterior pharynx defective 1 homolog A (C. elegans) (APH1A), transcript variant 2, mRNA [NM_016022]	-0.745503	-0.586449	-1.21249
SAE1	NM_005500	ref|Homo sapiens SUMO1 activating enzyme subunit 1 (SAE1), transcript variant 1, mRNA [NM_005500]	-0.132434	-0.273666	-0.356546
LOC286109	AK092172	gb|Homo sapiens cDNA FLJ34853 fis, clone NT2NE2012199. [AK092172]	-0.235175	-0.46471	-1.08185
LRPPRC	NM_133259	ref|Homo sapiens leucine-rich PPR-motif containing (LRPPRC), mRNA [NM_133259]	0.0142995	-0.0146783	-0.446424
RARA	NM_001024809	ref|Homo sapiens retinoic acid receptor, alpha (RARA), transcript variant 2, mRNA [NM_001024809]	0.204211	0.165406	0.685398
EHMT1	NM_024757	ref|Homo sapiens euchromatic histone-lysine N-methyltransferase 1 (EHMT1), transcript variant 1, mRNA [NM_024757]	-0.262152	-0.115745	-0.551069
GYG1	NM_004130	ref|Homo sapiens glycogenin 1 (GYG1), transcript variant 1, mRNA [NM_004130]	0.178228	0.17896	0.298948
ERCC5	NM_000123	ref|Homo sapiens excision repair cross-complementing rodent repair deficiency, complementation group 5 (ERCC5), mRNA [NM_000123]	0.219979	0.108448	0.434917
RPL3	NM_000967	ref|Homo sapiens ribosomal protein L3 (RPL3), transcript variant 1, mRNA [NM_000967]	-0.0904718	-0.0177239	-0.573747
GRHPR	NM_012203	ref|Homo sapiens glyoxylate reductase/hydroxypyruvate reductase (GRHPR), mRNA [NM_012203]	-0.189569	-0.320694	-0.597396
ULBP1	NM_025218	ref|Homo sapiens UL16 binding protein 1 (ULBP1), mRNA [NM_025218]	0.0560075	0.175743	0.394212
OLA1	NM_013341	ref|Homo sapiens Obg-like ATPase 1 (OLA1), transcript variant 1, mRNA [NM_013341]	-0.0323949	-0.544978	-0.971552
UBFD1	NM_019116	ref|Homo sapiens ubiquitin family domain containing 1 (UBFD1), mRNA [NM_019116]	0.321938	0.142805	0.933583
C10orf11	NM_032024	ref|Homo sapiens chromosome 10 open reading frame 11 (C10orf11), mRNA [NM_032024]	-0.442446	-1.37009	-1.52639
ICAM1	NM_000201	ref|Homo sapiens intercellular adhesion molecule 1 (ICAM1), mRNA [NM_000201]	0.206333	0.424921	0.410591
CTPS	NM_001905	ref|Homo sapiens CTP synthase (CTPS), mRNA [NM_001905]	0.235943	-0.604631	-0.621946
ZC3HC1	NM_016478	ref|Homo sapiens zinc finger, C3HC-type containing 1 (ZC3HC1), mRNA [NM_016478]	-0.147203	-0.36796	-0.704042
PDGFA	NM_033023	ref|Homo sapiens platelet-derived growth factor alpha polypeptide (PDGFA), transcript variant 2, mRNA [NM_033023]	-0.435101	-0.497512	-0.813815
ASXL2	NM_018263	ref|Homo sapiens additional sex combs like 2 (Drosophila) (ASXL2), mRNA [NM_018263]	-0.281552	-0.0469256	-0.623925
ZNF626	NM_145297	ref|Homo sapiens zinc finger protein 626 (ZNF626), transcript variant 2, mRNA [NM_145297]	0.16783	0.334316	0.690588
ZNF219	NM_016423	ref|Homo sapiens zinc finger protein 219 (ZNF219), transcript variant 1, mRNA [NM_016423]	-0.627528	-0.264496	-1.01463
PPFIBP1	NM_177444	ref|Homo sapiens PTPRF interacting protein, binding protein 1 (liprin beta 1) (PPFIBP1), transcript variant 2, mRNA [NM_177444]	-0.12765	-0.505822	-0.950932
S100PBP	NM_022753	ref|Homo sapiens S100P binding protein (S100PBP), transcript variant 1, mRNA [NM_022753]	0.131834	0.68826	0.540977
STIM1	NM_003156	ref|Homo sapiens stromal interaction molecule 1 (STIM1), mRNA [NM_003156]	-0.183353	-0.0181257	-0.61157
PARP12	NM_022750	ref|Homo sapiens poly (ADP-ribose) polymerase family, member 12 (PARP12), mRNA [NM_022750]	0.443938	0.190805	0.231014
ENST00000377836	ENST00000377836	ens|hairy and enhancer of split 2 (Drosophila) [Source:HGNC Symbol;Acc:16005] [ENST00000377836]	0.210636	0.253191	0.334535
LGTN	NM_006893	ref|Homo sapiens ligatin (LGTN), mRNA [NM_006893]	-0.163634	-0.258236	-0.484295
CWC27	NM_005869	ref|Homo sapiens CWC27 spliceosome-associated protein homolog (S. cerevisiae) (CWC27), mRNA [NM_005869]	0.0683559	-0.657295	-0.759495
GNLY	NM_006433	ref|Homo sapiens granulysin (GNLY), transcript variant NKG5, mRNA [NM_006433]	-0.0590389	-0.437874	-0.635671
SIAH1	NM_003031	ref|Homo sapiens seven in absentia homolog 1 (Drosophila) (SIAH1), transcript variant 1, mRNA [NM_003031]	0.0844072	-0.0668017	0.387699
WDR8	NM_017818	ref|Homo sapiens WD repeat domain 8 (WDR8), mRNA [NM_017818]	-0.242405	-0.416659	-0.611804
UBB	NM_018955	ref|Homo sapiens ubiquitin B (UBB), mRNA [NM_018955]	0.092062	0.399485	0.455081
GAPDH	NM_002046	ref|Homo sapiens glyceraldehyde-3-phosphate dehydrogenase (GAPDH), mRNA [NM_002046]	-0.172335	-0.219663	-0.618826
DMTF1	NR_024549	ref|Homo sapiens cyclin D binding myb-like transcription factor 1 (DMTF1), transcript variant 4, non-coding RNA [NR_024549]	-0.164508	0.133537	0.377712
GTF2E1	NM_005513	ref|Homo sapiens general transcription factor IIE, polypeptide 1, alpha 56kDa (GTF2E1), mRNA [NM_005513]	0.174133	0.19382	0.413986
PCCA	NM_000282	ref|Homo sapiens propionyl CoA carboxylase, alpha polypeptide (PCCA), nuclear gene encoding mitochondrial protein, transcript variant 1, mRNA [NM_000282]	-0.313712	-0.950246	-1.40446
INCENP	NM_001040694	ref|Homo sapiens inner centromere protein antigens 135/155kDa (INCENP), transcript variant 1, mRNA [NM_001040694]	0.235467	0.608709	0.752566
SIGLEC16	NR_002825	ref|Homo sapiens sialic acid binding Ig-like lectin 16 (gene/pseudogene) (SIGLEC16), non-coding RNA [NR_002825]	0.0980526	0.441818	0.655206
RGS4	BC000737	gb|Homo sapiens regulator of G-protein signaling 4, mRNA (cDNA clone MGC:2124 IMAGE:3510260), complete cds. [BC000737]	0.0898914	0.430723	0.493645
NHP2L1	NM_005008	ref|Homo sapiens NHP2 non-histone chromosome protein 2-like 1 (S. cerevisiae) (NHP2L1), transcript variant 1, mRNA [NM_005008]	-0.113432	0.0921716	-0.145838
EXOC1	NM_001024924	ref|Homo sapiens exocyst complex component 1 (EXOC1), transcript variant 3, mRNA [NM_001024924]	0.361525	0.546288	0.708702
PRDX1	NM_002574	ref|Homo sapiens peroxiredoxin 1 (PRDX1), transcript variant 1, mRNA [NM_002574]	0.210716	0.419687	0.676135
GPD2	NM_001083112	ref|Homo sapiens glycerol-3-phosphate dehydrogenase 2 (mitochondrial) (GPD2), nuclear gene encoding mitochondrial protein, transcript variant 1, mRNA [NM_001083112]	-0.339611	-0.6883	-1.0857
METT11D1	NM_022734	ref|Homo sapiens methyltransferase 11 domain containing 1 (METT11D1), transcript variant 2, mRNA [NM_022734]	-0.122483	-0.0824943	-0.367026
APH1A	NM_016022	ref|Homo sapiens anterior pharynx defective 1 homolog A (C. elegans) (APH1A), transcript variant 2, mRNA [NM_016022]	-0.714032	-0.477605	-1.29193
SLC25A23	NM_024103	ref|Homo sapiens solute carrier family 25 (mitochondrial carrier; phosphate carrier), member 23 (SLC25A23), nuclear gene encoding mitochondrial protein, mRNA [NM_024103]	-0.208481	-0.381733	-0.75036
ENST00000434244	ENST00000434244	gb|Homo sapiens cDNA clone IMAGE:5268928. [BC031250]	-0.135126	-0.727796	-0.947298
ACOX2	NM_003500	ref|Homo sapiens acyl-CoA oxidase 2, branched chain (ACOX2), mRNA [NM_003500]	0.760177	1.00438	1.41685
BCR	NM_004327	ref|Homo sapiens breakpoint cluster region (BCR), transcript variant 1, mRNA [NM_004327]	-0.13895	-0.088133	-0.485687
NF1	NM_001042492	ref|Homo sapiens neurofibromin 1 (NF1), transcript variant 1, mRNA [NM_001042492]	-0.152903	-0.360951	-0.663301
ENST00000394884	ENST00000394884	ens|cell division cycle 23 homolog (S. cerevisiae) [Source:HGNC Symbol;Acc:1724] [ENST00000394884]	0.534309	0.164651	0.666353
ZNF561	NM_152289	ref|Homo sapiens zinc finger protein 561 (ZNF561), mRNA [NM_152289]	0.0423191	0.171795	0.311671
MAX	NM_145113	ref|Homo sapiens MYC associated factor X (MAX), transcript variant 3, mRNA [NM_145113]	-0.00699456	0.443236	0.312766
BM701600	BM701600	gb|UI-E-EJ0-ahl-n-19-0-UI.r1 UI-E-EJ0 Homo sapiens cDNA clone UI-E-EJ0-ahl-n-19-0-UI 5', mRNA sequence [BM701600]	0.150701	0.4192	0.611089
C1orf113	NM_001162530	ref|Homo sapiens chromosome 1 open reading frame 113 (C1orf113), transcript variant 1, mRNA [NM_001162530]	0.263239	0.982954	1.06603
APOL2	NM_145637	ref|Homo sapiens apolipoprotein L, 2 (APOL2), transcript variant beta, mRNA [NM_145637]	0.325217	0.575702	0.841138
C11orf95	NM_001144936	ref|Homo sapiens chromosome 11 open reading frame 95 (C11orf95), mRNA [NM_001144936]	-0.126998	-0.0691944	-0.106579
PGBD2	NM_170725	ref|Homo sapiens piggyBac transposable element derived 2 (PGBD2), transcript variant 1, mRNA [NM_170725]	0.141238	0.301349	0.362897
PMS2P11	NR_023383	ref|Homo sapiens postmeiotic segregation increased 2 pseudogene 11 (PMS2P11), non-coding RNA [NR_023383]	-0.0984069	0.533855	0.60554
MAP2K5	NM_002757	ref|Homo sapiens mitogen-activated protein kinase kinase 5 (MAP2K5), transcript variant B, mRNA [NM_002757]	-0.335551	-0.324926	-0.566968
TP53INP2	NM_021202	ref|Homo sapiens tumor protein p53 inducible nuclear protein 2 (TP53INP2), mRNA [NM_021202]	0.568104	1.26336	1.21733
ATP5G2	NM_001002031	ref|Homo sapiens ATP synthase, H+ transporting, mitochondrial Fo complex, subunit C2 (subunit 9) (ATP5G2), nuclear gene encoding mitochondrial protein, transcript variant 1, mRNA [NM_001002031]	-0.126146	-0.28245	-0.34106
RANBP17	NM_022897	ref|Homo sapiens RAN binding protein 17 (RANBP17), mRNA [NM_022897]	-0.145999	-0.539337	-0.950228
C16orf42	NM_001001410	ref|Homo sapiens chromosome 16 open reading frame 42 (C16orf42), mRNA [NM_001001410]	-0.186424	-0.46193	-0.523535
SETDB1	NM_012432	ref|Homo sapiens SET domain, bifurcated 1 (SETDB1), transcript variant 2, mRNA [NM_012432]	0.204153	-0.0618111	0.253191
KDM4C	NM_015061	ref|Homo sapiens lysine (K)-specific demethylase 4C (KDM4C), transcript variant 1, mRNA [NM_015061]	-0.126701	-0.468197	-0.90688
NAIP	NM_004536	ref|Homo sapiens NLR family, apoptosis inhibitory protein (NAIP), transcript variant 1, mRNA [NM_004536]	-0.425605	-0.221122	-0.622485
MSH3	NM_002439	ref|Homo sapiens mutS homolog 3 (E. coli) (MSH3), mRNA [NM_002439]	-0.226221	-0.543853	-0.604223
ZNF252	NR_023392	ref|Homo sapiens zinc finger protein 252 (ZNF252), non-coding RNA [NR_023392]	0.309413	0.375909	0.544903
SIAH1	NM_003031	ref|Homo sapiens seven in absentia homolog 1 (Drosophila) (SIAH1), transcript variant 1, mRNA [NM_003031]	0.126423	-0.0301952	0.408456
CNNM4	NM_020184	ref|Homo sapiens cyclin M4 (CNNM4), mRNA [NM_020184]	0.235864	0.943692	1.47412
MXD4	NM_006454	ref|Homo sapiens MAX dimerization protein 4 (MXD4), mRNA [NM_006454]	0.191661	0.756745	0.992708
RGP1	ENST00000378078	ens|RGP1 retrograde golgi transport homolog (S. cerevisiae) [Source:HGNC Symbol;Acc:21965] [ENST00000378078]	0.0937584	0.118621	0.465162
DHRSX	NM_145177	ref|Homo sapiens dehydrogenase/reductase (SDR family) X-linked (DHRSX), mRNA [NM_145177]	-0.297151	-0.994881	-1.25324
YY1AP1	NM_139118	ref|Homo sapiens YY1 associated protein 1 (YY1AP1), transcript variant 2, mRNA [NM_139118]	0.118325	0.561388	0.94192
PTPN11	NM_002834	ref|Homo sapiens protein tyrosine phosphatase, non-receptor type 11 (PTPN11), mRNA [NM_002834]	-0.133611	-0.437547	-0.828716
GAPDH	NM_002046	ref|Homo sapiens glyceraldehyde-3-phosphate dehydrogenase (GAPDH), mRNA [NM_002046]	-0.158645	-0.240355	-0.610943
GAS6	NM_000820	ref|Homo sapiens growth arrest-specific 6 (GAS6), transcript variant 1, mRNA [NM_000820]	-0.669424	-0.385209	-0.673307
AKIRIN1	NM_024595	ref|Homo sapiens akirin 1 (AKIRIN1), transcript variant 1, mRNA [NM_024595]	-0.0719161	0.105007	0.19121
C7orf54	NR_027330	ref|Homo sapiens chromosome 7 open reading frame 54 (C7orf54), non-coding RNA [NR_027330]	-0.149644	-0.537828	-0.762254
DPCD	NM_015448	ref|Homo sapiens deleted in primary ciliary dyskinesia homolog (mouse) (DPCD), mRNA [NM_015448]	0.100131	0.388967	0.45818
ZNFX1	NM_021035	ref|Homo sapiens zinc finger, NFX1-type containing 1 (ZNFX1), mRNA [NM_021035]	0.140527	0.114201	0.522129
ZNF189	NM_197977	ref|Homo sapiens zinc finger protein 189 (ZNF189), transcript variant 2, mRNA [NM_197977]	0.184498	0.328469	0.725103
HIST1H4L	NM_003546	ref|Homo sapiens histone cluster 1, H4l (HIST1H4L), mRNA [NM_003546]	0.0403716	-0.949785	-0.409322
PRKCA	NM_002737	ref|Homo sapiens protein kinase C, alpha (PRKCA), mRNA [NM_002737]	-0.546004	-0.53343	-1.01791
MGAT1	NM_001114618	ref|Homo sapiens mannosyl (alpha-1,3-)-glycoprotein beta-1,2-N-acetylglucosaminyltransferase (MGAT1), transcript variant 1, mRNA [NM_001114618]	0.0779453	0.163518	0.494364
ENST00000380308	ENST00000380308	ens|zinc finger (CCCH type), RNA-binding motif and serine/arginine rich 2 [Source:HGNC Symbol;Acc:23019] [ENST00000380308]	0.301203	0.0731234	0.812714
SMC6	NM_024624	ref|Homo sapiens structural maintenance of chromosomes 6 (SMC6), transcript variant 2, mRNA [NM_024624]	0.433393	0.322686	0.445722
SEC61B	NM_006808	ref|Homo sapiens Sec61 beta subunit (SEC61B), mRNA [NM_006808]	0.150947	0.0905248	0.362883
RASA4	NM_006989	ref|Homo sapiens RAS p21 protein activator 4 (RASA4), transcript variant 1, mRNA [NM_006989]	0.179447	0.475666	0.622556
PRKAR2A	NM_004157	ref|Homo sapiens protein kinase, cAMP-dependent, regulatory, type II, alpha (PRKAR2A), mRNA [NM_004157]	-0.238666	-0.166293	-0.726756
TSPAN5	NM_005723	ref|Homo sapiens tetraspanin 5 (TSPAN5), mRNA [NM_005723]	-0.0963282	-0.538287	-0.746083
SMC6	NM_024624	ref|Homo sapiens structural maintenance of chromosomes 6 (SMC6), transcript variant 2, mRNA [NM_024624]	0.422041	0.313141	0.433667
GABARAPL1	NM_031412	ref|Homo sapiens GABA(A) receptor-associated protein like 1 (GABARAPL1), mRNA [NM_031412]	0.369177	0.71795	1.19845
KIRREL2	NM_199180	ref|Homo sapiens kin of IRRE like 2 (Drosophila) (KIRREL2), transcript variant 3, mRNA [NM_199180]	1.02489	1.31002	1.91491
SMCR7L	NM_019008	ref|Homo sapiens Smith-Magenis syndrome chromosome region, candidate 7-like (SMCR7L), mRNA [NM_019008]	0.0921565	0.23989	0.343872
NCRNA00120	NR_002767	ref|Homo sapiens non-protein coding RNA 120 (NCRNA00120), non-coding RNA [NR_002767]	0.21328	0.60397	0.932101
CNNM4	NM_020184	ref|Homo sapiens cyclin M4 (CNNM4), mRNA [NM_020184]	0.253857	0.998531	1.40434
FAM193A	NM_003704	ref|Homo sapiens family with sequence similarity 193, member A (FAM193A), mRNA [NM_003704]	-0.276527	-0.245182	-0.572682
PRDX1	NM_002574	ref|Homo sapiens peroxiredoxin 1 (PRDX1), transcript variant 1, mRNA [NM_002574]	0.200439	0.40995	0.686431
PLRG1	NM_002669	ref|Homo sapiens pleiotropic regulator 1 (PRL1 homolog, Arabidopsis) (PLRG1), mRNA [NM_002669]	0.26239	0.119771	0.566547
SPIN1	NM_006717	ref|Homo sapiens spindlin 1 (SPIN1), mRNA [NM_006717]	-0.069607	-0.401618	-0.546626
MYSM1	NM_001085487	ref|Homo sapiens Myb-like, SWIRM and MPN domains 1 (MYSM1), mRNA [NM_001085487]	0.215109	0.680683	0.86674
C1S	NM_001734	ref|Homo sapiens complement component 1, s subcomponent (C1S), transcript variant 2, mRNA [NM_001734]	0.528946	1.85162	2.05607
MYO1B	NM_012223	ref|Homo sapiens myosin IB (MYO1B), transcript variant 2, mRNA [NM_012223]	0.0904547	-0.316014	-0.281877
FAM43A	NM_153690	ref|Homo sapiens family with sequence similarity 43, member A (FAM43A), mRNA [NM_153690]	-0.16188	1.04071	1.18122
AARSD1	NM_025267	ref|Homo sapiens alanyl-tRNA synthetase domain containing 1 (AARSD1), transcript variant 2, mRNA [NM_025267]	-0.200582	-0.258391	-0.615078
ATXN10	NM_013236	ref|Homo sapiens ataxin 10 (ATXN10), transcript variant 1, mRNA [NM_013236]	-0.312933	-0.987658	-0.990105
EIF1AD	NM_032325	ref|Homo sapiens eukaryotic translation initiation factor 1A domain containing (EIF1AD), mRNA [NM_032325]	0.152937	0.40648	0.76409
KDM4C	BC053678	gb|Homo sapiens cDNA clone IMAGE:6165770, partial cds. [BC053678]	0.225881	0.421314	0.349692
LOC100009676	NR_024407	ref|Homo sapiens hypothetical LOC100009676 (LOC100009676), non-coding RNA [NR_024407]	0.219365	0.0945321	0.0783119
MINA	NM_001042533	ref|Homo sapiens MYC induced nuclear antigen (MINA), transcript variant 1, mRNA [NM_001042533]	0.0497218	-0.446818	-0.458748
FASTKD5	NM_021826	ref|Homo sapiens FAST kinase domains 5 (FASTKD5), mRNA [NM_021826]	0.123456	0.233471	0.509011
CPNE1	NM_003915	ref|Homo sapiens copine I (CPNE1), transcript variant 3, mRNA [NM_003915]	-0.139164	-0.204407	-0.474689
P4HA2	NM_004199	ref|Homo sapiens prolyl 4-hydroxylase, alpha polypeptide II (P4HA2), transcript variant 1, mRNA [NM_004199]	0.374172	0.298761	0.468717
UNC119	NM_005148	ref|Homo sapiens unc-119 homolog (C. elegans) (UNC119), transcript variant 1, mRNA [NM_005148]	0.187624	0.434822	0.815174
SCAI	NM_173690	ref|Homo sapiens suppressor of cancer cell invasion (SCAI), transcript variant 1, mRNA [NM_173690]	-0.450242	-0.0109642	-0.736306
VAMP8	NM_003761	ref|Homo sapiens vesicle-associated membrane protein 8 (endobrevin) (VAMP8), mRNA [NM_003761]	0.176894	0.576672	0.84313
PIP4K2B	NM_003559	ref|Homo sapiens phosphatidylinositol-5-phosphate 4-kinase, type II, beta (PIP4K2B), mRNA [NM_003559]	-0.133095	-0.381441	-0.418785
B3GNTL1	NM_001009905	ref|Homo sapiens UDP-GlcNAc:betaGal beta-1,3-N-acetylglucosaminyltransferase-like 1 (B3GNTL1), mRNA [NM_001009905]	-0.397354	-0.446214	-0.602516
FAM91A1	NM_144963	ref|Homo sapiens family with sequence similarity 91, member A1 (FAM91A1), mRNA [NM_144963]	0.273488	0.0828835	0.321285
SMCR7L	NM_019008	ref|Homo sapiens Smith-Magenis syndrome chromosome region, candidate 7-like (SMCR7L), mRNA [NM_019008]	0.0731418	0.28883	0.355773
DDT	NM_001355	ref|Homo sapiens D-dopachrome tautomerase (DDT), transcript variant 1, mRNA [NM_001355]	0.0773401	0.476949	0.672985
SIAH1	NM_003031	ref|Homo sapiens seven in absentia homolog 1 (Drosophila) (SIAH1), transcript variant 1, mRNA [NM_003031]	0.0805126	-0.0143389	0.380904
RMND5A	NM_022780	ref|Homo sapiens required for meiotic nuclear division 5 homolog A (S. cerevisiae) (RMND5A), mRNA [NM_022780]	-0.105223	0.0455483	0.202303
PRDX1	NM_002574	ref|Homo sapiens peroxiredoxin 1 (PRDX1), transcript variant 1, mRNA [NM_002574]	0.19383	0.395124	0.59633
SPCS1	NM_014041	ref|Homo sapiens signal peptidase complex subunit 1 homolog (S. cerevisiae) (SPCS1), mRNA [NM_014041]	0.0726201	0.188084	0.307465
CCL26	NM_006072	ref|Homo sapiens chemokine (C-C motif) ligand 26 (CCL26), mRNA [NM_006072]	0.545609	0.518764	2.12896
FAM193A	NM_003704	ref|Homo sapiens family with sequence similarity 193, member A (FAM193A), mRNA [NM_003704]	-0.292103	-0.25393	-0.607896
EWSR1	NM_013986	ref|Homo sapiens Ewing sarcoma breakpoint region 1 (EWSR1), transcript variant 1, mRNA [NM_013986]	-0.140937	-0.62018	-0.826822
PMEL	NM_006928	ref|Homo sapiens premelanosome protein (PMEL), transcript variant 3, mRNA [NM_006928]	0.47473	1.72357	1.81214
SMCR7L	NM_019008	ref|Homo sapiens Smith-Magenis syndrome chromosome region, candidate 7-like (SMCR7L), mRNA [NM_019008]	0.0709642	0.264421	0.32918
CPNE1	NM_003915	ref|Homo sapiens copine I (CPNE1), transcript variant 3, mRNA [NM_003915]	-0.0829904	-0.248427	-0.455621
ZNF684	NM_152373	ref|Homo sapiens zinc finger protein 684 (ZNF684), mRNA [NM_152373]	0.262366	0.499451	0.781171
DEM1	NM_022774	ref|Homo sapiens defects in morphology 1 homolog (S. cerevisiae) (DEM1), mRNA [NM_022774]	0.204159	0.415034	0.742831
CD3D	NM_000732	ref|Homo sapiens CD3d molecule, delta (CD3-TCR complex) (CD3D), transcript variant 1, mRNA [NM_000732]	0.863091	0.699688	1.54198
ROR1	NM_005012	ref|Homo sapiens receptor tyrosine kinase-like orphan receptor 1 (ROR1), transcript variant 1, mRNA [NM_005012]	-0.164087	-0.891912	-1.1838
ATF3	NM_001040619	ref|Homo sapiens activating transcription factor 3 (ATF3), transcript variant 4, mRNA [NM_001040619]	-0.0653561	-0.186514	-0.0661373
METTL13	NM_015935	ref|Homo sapiens methyltransferase like 13 (METTL13), transcript variant 1, mRNA [NM_015935]	0.148068	0.111153	0.600943
C10orf11	NM_032024	ref|Homo sapiens chromosome 10 open reading frame 11 (C10orf11), mRNA [NM_032024]	-0.552719	-1.30894	-1.51102
TNPO3	NM_012470	ref|Homo sapiens transportin 3 (TNPO3), transcript variant 1, mRNA [NM_012470]	0.0135845	-0.35176	-0.445548
UBIAD1	NM_013319	ref|Homo sapiens UbiA prenyltransferase domain containing 1 (UBIAD1), mRNA [NM_013319]	0.165503	0.0814152	0.54728
SLC1A7	NM_006671	ref|Homo sapiens solute carrier family 1 (glutamate transporter), member 7 (SLC1A7), mRNA [NM_006671]	0.644754	0.851604	1.38312
RARRES3	NM_004585	ref|Homo sapiens retinoic acid receptor responder (tazarotene induced) 3 (RARRES3), mRNA [NM_004585]	0.0996714	0.514003	1.14287
CDK9	NM_001261	ref|Homo sapiens cyclin-dependent kinase 9 (CDK9), mRNA [NM_001261]	0.102685	0.161276	0.724453
FRMD8	NM_031904	ref|Homo sapiens FERM domain containing 8 (FRMD8), mRNA [NM_031904]	0.0881408	0.567754	0.87258
PAQR3	NM_001040202	ref|Homo sapiens progestin and adipoQ receptor family member III (PAQR3), mRNA [NM_001040202]	0.537736	0.0932887	0.423793
HIST1H2BN	NM_003520	ref|Homo sapiens histone cluster 1, H2bn (HIST1H2BN), mRNA [NM_003520]	-0.303552	-0.629056	-0.559214
ACTR6	NM_022496	ref|Homo sapiens ARP6 actin-related protein 6 homolog (yeast) (ACTR6), mRNA [NM_022496]	0.332636	0.111517	0.476514
TIGD7	NM_033208	ref|Homo sapiens tigger transposable element derived 7 (TIGD7), mRNA [NM_033208]	0.619254	0.995867	1.57216
RPS2P32	NR_026676	ref|Homo sapiens ribosomal protein S2 pseudogene 32 (RPS2P32), non-coding RNA [NR_026676]	-0.0706996	-0.294477	-0.434775
WTAP	BC028180	gb|Homo sapiens Wilms tumor 1 associated protein, mRNA (cDNA clone IMAGE:5399821), partial cds. [BC028180]	0.27511	-0.240496	0.00626307
CDC37L1	NM_017913	ref|Homo sapiens cell division cycle 37 homolog (S. cerevisiae)-like 1 (CDC37L1), mRNA [NM_017913]	0.536158	0.598495	0.870697
FAM169A	NM_015566	ref|Homo sapiens family with sequence similarity 169, member A (FAM169A), mRNA [NM_015566]	-0.245073	-0.570516	-0.769514
GCH1	NM_000161	ref|Homo sapiens GTP cyclohydrolase 1 (GCH1), transcript variant 1, mRNA [NM_000161]	0.485846	0.54367	0.599544
2016-03-07	NM_022826	ref|Homo sapiens membrane-associated ring finger (C3HC4) 7 (MARCH7), mRNA [NM_022826]	0.310512	0.0635801	0.599888
ZNF223	NM_013361	ref|Homo sapiens zinc finger protein 223 (ZNF223), mRNA [NM_013361]	0.357203	0.730742	1.23276
GLS	NM_014905	ref|Homo sapiens glutaminase (GLS), nuclear gene encoding mitochondrial protein, mRNA [NM_014905]	0.208563	0.40375	0.54693
RHOT2	NM_138769	ref|Homo sapiens ras homolog gene family, member T2 (RHOT2), nuclear gene encoding mitochondrial protein, mRNA [NM_138769]	-0.115723	0.11831	0.34276
TBC1D1	BC028196	gb|Homo sapiens TBC1 (tre-2/USP6, BUB2, cdc16) domain family, member 1, mRNA (cDNA clone IMAGE:5211948), with apparent retained intron. [BC028196]	-0.283069	0.439349	-0.0514447
RPL23AP71	CR595167	gb|full-length cDNA clone CS0DI028YD16 of Placenta Cot 25-normalized of Homo sapiens (human). [CR595167]	0.141452	0.386051	0.637699
MRFAP1	NM_033296	ref|Homo sapiens Mof4 family associated protein 1 (MRFAP1), mRNA [NM_033296]	-0.15107	-0.429246	-0.504599
GOT2	NM_002080	ref|Homo sapiens glutamic-oxaloacetic transaminase 2, mitochondrial (aspartate aminotransferase 2) (GOT2), nuclear gene encoding mitochondrial protein, mRNA [NM_002080]	-0.107814	-0.286563	-0.398469
HSPH1	NM_006644	ref|Homo sapiens heat shock 105kDa/110kDa protein 1 (HSPH1), mRNA [NM_006644]	0.289755	0.0652952	0.547695
SLC41A3	NM_017836	ref|Homo sapiens solute carrier family 41, member 3 (SLC41A3), transcript variant 2, mRNA [NM_017836]	-0.0975691	-0.379906	-0.442696
DNAJC21	NM_194283	ref|Homo sapiens DnaJ (Hsp40) homolog, subfamily C, member 21 (DNAJC21), transcript variant 1, mRNA [NM_194283]	-0.0874953	-0.216839	-0.546945
A_24_P272352	A_24_P272352	Unknown	-0.122655	-0.190235	-0.351364
PRIM2	NM_000947	ref|Homo sapiens primase, DNA, polypeptide 2 (58kDa) (PRIM2), mRNA [NM_000947]	0.0508556	-0.509408	-0.310381
FHOD1	NM_013241	ref|Homo sapiens formin homology 2 domain containing 1 (FHOD1), mRNA [NM_013241]	-0.269596	-0.392782	-0.914756
C20orf30	NM_001009924	ref|Homo sapiens chromosome 20 open reading frame 30 (C20orf30), transcript variant 2, mRNA [NM_001009924]	0.289376	0.30449	0.621705
C3orf1	NM_016589	ref|Homo sapiens chromosome 3 open reading frame 1 (C3orf1), mRNA [NM_016589]	0.241753	0.304957	0.617552
HOOK1	NM_015888	ref|Homo sapiens hook homolog 1 (Drosophila) (HOOK1), mRNA [NM_015888]	-0.0228061	-0.104285	-0.344839
LOC100506052	XM_003118999	ref|PREDICTED: Homo sapiens hypothetical protein LOC100506052 (LOC100506052), mRNA [XM_003118999]	-0.26092	-0.747458	-0.701813
BARD1	NM_000465	ref|Homo sapiens BRCA1 associated RING domain 1 (BARD1), mRNA [NM_000465]	-0.17002	-0.578682	-0.771449
ROR1	NM_005012	ref|Homo sapiens receptor tyrosine kinase-like orphan receptor 1 (ROR1), transcript variant 1, mRNA [NM_005012]	-0.13641	-0.855008	-1.33105
HIST1H2AI	NM_003509	ref|Homo sapiens histone cluster 1, H2ai (HIST1H2AI), mRNA [NM_003509]	-0.360314	-0.452849	-0.662984
CCDC53	NM_016053	ref|Homo sapiens coiled-coil domain containing 53 (CCDC53), mRNA [NM_016053]	-0.48316	-0.254799	-0.392582
CBARA1	NM_006077	ref|Homo sapiens calcium binding atopy-related autoantigen 1 (CBARA1), nuclear gene encoding mitochondrial protein, transcript variant 1, mRNA [NM_006077]	-0.284421	-0.472922	-0.959007
CTPS2	NM_175859	ref|Homo sapiens CTP synthase II (CTPS2), transcript variant 2, mRNA [NM_175859]	-0.296249	-0.623014	-0.915136
ZNF813	NM_001004301	ref|Homo sapiens zinc finger protein 813 (ZNF813), mRNA [NM_001004301]	0.312344	0.483989	1.01708
C3orf19	NM_016474	ref|Homo sapiens chromosome 3 open reading frame 19 (C3orf19), mRNA [NM_016474]	0.368971	0.356153	0.646429
OTUD6B	NM_016023	ref|Homo sapiens OTU domain containing 6B (OTUD6B), mRNA [NM_016023]	-0.124743	-0.492786	-0.402305
PNRC2	NM_017761	ref|Homo sapiens proline-rich nuclear receptor coactivator 2 (PNRC2), mRNA [NM_017761]	0.180517	0.237682	0.445584
PRKCD	NM_006254	ref|Homo sapiens protein kinase C, delta (PRKCD), transcript variant 1, mRNA [NM_006254]	0.216853	0.134072	0.34575
LBH	NM_030915	ref|Homo sapiens limb bud and heart development homolog (mouse) (LBH), mRNA [NM_030915]	-0.196109	0.328583	0.209726
KPTN	NM_007059	ref|Homo sapiens kaptin (actin binding protein) (KPTN), mRNA [NM_007059]	-0.113129	-0.135225	-0.422737
FHL2	NM_001039492	ref|Homo sapiens four and a half LIM domains 2 (FHL2), transcript variant 5, mRNA [NM_001039492]	0.157977	-0.640381	-0.753253
LBH	NM_030915	ref|Homo sapiens limb bud and heart development homolog (mouse) (LBH), mRNA [NM_030915]	-0.217377	0.278695	0.19623
ZNF525	NR_003699	ref|Homo sapiens zinc finger protein 525 (ZNF525), non-coding RNA [NR_003699]	0.147045	0.389798	0.631987
RCC2	NM_018715	ref|Homo sapiens regulator of chromosome condensation 2 (RCC2), transcript variant 1, mRNA [NM_018715]	-0.163662	-0.298914	-0.473442
FAR1	NM_032228	ref|Homo sapiens fatty acyl CoA reductase 1 (FAR1), mRNA [NM_032228]	0.0239123	-0.18002	-0.033486
CHIC2	NM_012110	ref|Homo sapiens cysteine-rich hydrophobic domain 2 (CHIC2), mRNA [NM_012110]	0.298636	0.286144	0.508105
LOC441461	BC030123	gb|Homo sapiens hypothetical gene supported by BC030123, mRNA (cDNA clone IMAGE:4815474). [BC030123]	0.765358	0.919723	1.61571
ZC3H11A	NM_014827	ref|Homo sapiens zinc finger CCCH-type containing 11A (ZC3H11A), mRNA [NM_014827]	0.156968	0.339272	0.341387
NPM1	NM_002520	ref|Homo sapiens nucleophosmin (nucleolar phosphoprotein B23, numatrin) (NPM1), transcript variant 1, mRNA [NM_002520]	0.045054	-0.280619	-0.43881
ENST00000264899	ENST00000264899	ens|Fraser syndrome 1 [Source:HGNC Symbol;Acc:19185] [ENST00000264899]	-0.156664	-0.322507	-0.485816
COQ5	NM_032314	ref|Homo sapiens coenzyme Q5 homolog, methyltransferase (S. cerevisiae) (COQ5), nuclear gene encoding mitochondrial protein, mRNA [NM_032314]	-0.375502	-0.559863	-0.73341
C17orf96	NM_001130677	ref|Homo sapiens chromosome 17 open reading frame 96 (C17orf96), mRNA [NM_001130677]	0.120796	0.390801	0.587192
TMEM85	NM_016454	ref|Homo sapiens transmembrane protein 85 (TMEM85), mRNA [NM_016454]	0.05164	0.0515007	0.246586
PAFAH1B1	NM_000430	ref|Homo sapiens platelet-activating factor acetylhydrolase 1b, regulatory subunit 1 (45kDa) (PAFAH1B1), mRNA [NM_000430]	-0.111114	-0.370922	-0.587075
GNAI2	NM_002070	ref|Homo sapiens guanine nucleotide binding protein (G protein), alpha inhibiting activity polypeptide 2 (GNAI2), transcript variant 1, mRNA [NM_002070]	0.163276	0.353462	0.676789
HN1	NM_001002032	ref|Homo sapiens hematological and neurological expressed 1 (HN1), transcript variant 2, mRNA [NM_001002032]	0.266529	0.339078	0.780669
SMG6	NM_017575	ref|Homo sapiens Smg-6 homolog, nonsense mediated mRNA decay factor (C. elegans) (SMG6), transcript variant 1, mRNA [NM_017575]	-0.381497	-0.403967	-0.76731
CCT3	NM_005998	ref|Homo sapiens chaperonin containing TCP1, subunit 3 (gamma) (CCT3), transcript variant 1, mRNA [NM_005998]	-0.10447	-0.22101	-0.627183
ZNF284	ENST00000328297	ens|zinc finger protein 284 [Source:HGNC Symbol;Acc:13078] [ENST00000328297]	0.18086	0.602555	0.918462
ICAM1	NM_000201	ref|Homo sapiens intercellular adhesion molecule 1 (ICAM1), mRNA [NM_000201]	0.124324	0.396602	0.410178
A_24_P401601	A_24_P401601	Unknown	0.0176413	-0.494389	-0.868771
TBL1XR1	NM_024665	ref|Homo sapiens transducin (beta)-like 1 X-linked receptor 1 (TBL1XR1), mRNA [NM_024665]	0.254379	-0.58798	-0.754954
ENST00000522418	ENST00000522418	ref|PREDICTED: Homo sapiens hypothetical LOC100133311, transcript variant 1 (LOC100133311), partial miscRNA [XR_110658]	0.405108	0.299564	0.941097
FLCN	NM_144606	ref|Homo sapiens folliculin (FLCN), transcript variant 2, mRNA [NM_144606]	0.0934596	-0.00213303	0.669539
DIAPH3	NM_030932	ref|Homo sapiens diaphanous homolog 3 (Drosophila) (DIAPH3), transcript variant 2, mRNA [NM_030932]	-0.274761	-0.672663	-1.21359
APTX	NM_001195252	ref|Homo sapiens aprataxin (APTX), transcript variant 11, mRNA [NM_001195252]	0.0583874	-0.0394891	0.0217429
LIN54	NM_194282	ref|Homo sapiens lin-54 homolog (C. elegans) (LIN54), transcript variant 1, mRNA [NM_194282]	0.134015	0.399323	0.634179
NCRNA00087	NR_024493	ref|Homo sapiens non-protein coding RNA 87 (NCRNA00087), non-coding RNA [NR_024493]	0.0637381	0.324722	0.523376
EGFR	NM_005228	ref|Homo sapiens epidermal growth factor receptor (EGFR), transcript variant 1, mRNA [NM_005228]	0.143282	-0.513537	-0.452179
RPAP3	NM_024604	ref|Homo sapiens RNA polymerase II associated protein 3 (RPAP3), transcript variant 1, mRNA [NM_024604]	0.288628	0.444666	0.666358
INPP5A	NM_005539	ref|Homo sapiens inositol polyphosphate-5-phosphatase, 40kDa (INPP5A), mRNA [NM_005539]	-0.270774	-0.908818	-0.754583
SMAD2	NM_001003652	ref|Homo sapiens SMAD family member 2 (SMAD2), transcript variant 2, mRNA [NM_001003652]	-0.0249977	-0.57187	-0.540036
TBC1D15	NM_022771	ref|Homo sapiens TBC1 domain family, member 15 (TBC1D15), transcript variant 1, mRNA [NM_022771]	0.167461	0.138788	0.351817
ZNF841	NM_001136499	ref|Homo sapiens zinc finger protein 841 (ZNF841), mRNA [NM_001136499]	0.371013	0.508082	0.997761
DISC1	NM_001164550	ref|Homo sapiens disrupted in schizophrenia 1 (DISC1), transcript variant m, mRNA [NM_001164550]	0.201609	0.56814	-0.0332819
ABLIM1	NM_001003408	ref|Homo sapiens actin binding LIM protein 1 (ABLIM1), transcript variant 3, mRNA [NM_001003408]	-0.150592	-0.351595	-0.671175
TPM2	NM_213674	ref|Homo sapiens tropomyosin 2 (beta) (TPM2), transcript variant 2, mRNA [NM_213674]	1.2513	1.06427	1.79937
ICAM1	NM_000201	ref|Homo sapiens intercellular adhesion molecule 1 (ICAM1), mRNA [NM_000201]	0.189094	0.396583	0.43573
HOOK1	NM_015888	ref|Homo sapiens hook homolog 1 (Drosophila) (HOOK1), mRNA [NM_015888]	-0.245943	-0.127991	-0.485592
SHMT1	NM_004169	ref|Homo sapiens serine hydroxymethyltransferase 1 (soluble) (SHMT1), nuclear gene encoding mitochondrial protein, transcript variant 1, mRNA [NM_004169]	-0.215	-0.0680155	-0.490155
UBIAD1	NM_013319	ref|Homo sapiens UbiA prenyltransferase domain containing 1 (UBIAD1), mRNA [NM_013319]	0.170973	0.110658	0.554696
NT5DC1	NM_152729	ref|Homo sapiens 5'-nucleotidase domain containing 1 (NT5DC1), mRNA [NM_152729]	0.0562769	-0.574035	-0.395758
THADA	NM_022065	ref|Homo sapiens thyroid adenoma associated (THADA), transcript variant 1, mRNA [NM_022065]	-0.313784	-0.550196	-0.968127
LBH	NM_030915	ref|Homo sapiens limb bud and heart development homolog (mouse) (LBH), mRNA [NM_030915]	-0.22019	0.350309	0.211101
ABCD1	NM_000033	ref|Homo sapiens ATP-binding cassette, sub-family D (ALD), member 1 (ABCD1), mRNA [NM_000033]	0.169167	0.628574	0.949213
PTGES2	NM_025072	ref|Homo sapiens prostaglandin E synthase 2 (PTGES2), transcript variant 1, mRNA [NM_025072]	-0.23121	-0.606662	-0.684493
RG9MTD2	NM_152292	ref|Homo sapiens RNA (guanine-9-) methyltransferase domain containing 2 (RG9MTD2), transcript variant 1, mRNA [NM_152292]	0.281062	-0.499058	-0.718335
KIAA1539	NM_025182	ref|Homo sapiens KIAA1539 (KIAA1539), mRNA [NM_025182]	0.0483799	0.287584	0.469571
HNRNPH2	NM_019597	ref|Homo sapiens heterogeneous nuclear ribonucleoprotein H2 (H') (HNRNPH2), transcript variant 1, mRNA [NM_019597]	0.339123	0.44299	0.649316
PANK2	NM_153638	ref|Homo sapiens pantothenate kinase 2 (PANK2), nuclear gene encoding mitochondrial protein, transcript variant 1, mRNA [NM_153638]	0.12337	0.0677887	0.408636
LOC100508996	XM_003120761	ref|PREDICTED: Homo sapiens hypothetical protein LOC100508996 (LOC100508996), mRNA [XM_003120761]	-0.106867	0.24566	0.644131
CDC42EP1	NM_152243	ref|Homo sapiens CDC42 effector protein (Rho GTPase binding) 1 (CDC42EP1), mRNA [NM_152243]	0.329938	0.677983	0.898615
LGTN	NM_006893	ref|Homo sapiens ligatin (LGTN), mRNA [NM_006893]	-0.157052	-0.188664	-0.545819
TFIP11	NM_001008697	ref|Homo sapiens tuftelin interacting protein 11 (TFIP11), transcript variant 1, mRNA [NM_001008697]	0.123316	-0.085966	0.492271
DNAH2	NM_020877	ref|Homo sapiens dynein, axonemal, heavy chain 2 (DNAH2), mRNA [NM_020877]	1.38262	1.3901	1.47608
TBL1Y	NM_033284	ref|Homo sapiens transducin (beta)-like 1, Y-linked (TBL1Y), transcript variant 1, mRNA [NM_033284]	-0.590625	-1.32627	-1.3353
HMBS	NM_000190	ref|Homo sapiens hydroxymethylbilane synthase (HMBS), transcript variant 1, mRNA [NM_000190]	-0.259701	-0.57449	-0.808528
SMARCA4	NM_003072	ref|Homo sapiens SWI/SNF related, matrix associated, actin dependent regulator of chromatin, subfamily a, member 4 (SMARCA4), transcript variant 3, mRNA [NM_003072]	-0.260294	-0.0248986	-0.678541
DKFZP586B0319	AL050097	gb|Homo sapiens mRNA; cDNA DKFZp586B0319 (from clone DKFZp586B0319) [AL050097]	-0.157094	-0.319692	-0.705274
PHF20	NM_016436	ref|Homo sapiens PHD finger protein 20 (PHF20), mRNA [NM_016436]	-0.183509	-0.367027	-0.634499
RPF2	NM_032194	ref|Homo sapiens ribosome production factor 2 homolog (S. cerevisiae) (RPF2), mRNA [NM_032194]	0.0811158	-0.355871	-0.506363
ZNF684	NM_152373	ref|Homo sapiens zinc finger protein 684 (ZNF684), mRNA [NM_152373]	0.167909	0.367767	0.805966
PRKCD	NM_006254	ref|Homo sapiens protein kinase C, delta (PRKCD), transcript variant 1, mRNA [NM_006254]	0.238253	0.106251	0.347996
AARSD1	NM_025267	ref|Homo sapiens alanyl-tRNA synthetase domain containing 1 (AARSD1), transcript variant 2, mRNA [NM_025267]	-0.204054	-0.270846	-0.620766
PIGX	NM_001166304	ref|Homo sapiens phosphatidylinositol glycan anchor biosynthesis, class X (PIGX), transcript variant 1, mRNA [NM_001166304]	0.305846	0.432371	0.588762
APH1A	NM_016022	ref|Homo sapiens anterior pharynx defective 1 homolog A (C. elegans) (APH1A), transcript variant 2, mRNA [NM_016022]	-0.840317	-0.544203	-1.24084
NCRNA00287	NR_026677	ref|Homo sapiens non-protein coding RNA 287 (NCRNA00287), non-coding RNA [NR_026677]	-0.0476558	-0.183753	-0.382423
CTPS2	NM_175859	ref|Homo sapiens CTP synthase II (CTPS2), transcript variant 2, mRNA [NM_175859]	-0.403459	-0.802038	-0.931021
ENST00000395453	ENST00000395453	ens|serine/arginine-rich splicing factor 2, interacting protein [Source:HGNC Symbol;Acc:10784] [ENST00000395453]	0.244657	-0.0474886	0.487854
S100PBP	NM_001017406	ref|Homo sapiens S100P binding protein (S100PBP), transcript variant 2, mRNA [NM_001017406]	-0.0211696	0.424548	0.546476
BMS1	NM_014753	ref|Homo sapiens BMS1 homolog, ribosome assembly protein (yeast) (BMS1), mRNA [NM_014753]	0.0622915	-0.0114526	0.202691
CNP	NM_033133	ref|Homo sapiens 2',3'-cyclic nucleotide 3' phosphodiesterase (CNP), mRNA [NM_033133]	-0.204923	-0.457307	-0.0078168
PJA1	NM_145119	ref|Homo sapiens praja ring finger 1 (PJA1), transcript variant 1, mRNA [NM_145119]	0.242924	0.107839	0.565838
SPARC	NM_003118	ref|Homo sapiens secreted protein, acidic, cysteine-rich (osteonectin) (SPARC), mRNA [NM_003118]	1.84576	0.909784	1.65911
ZRANB3	NM_032143	ref|Homo sapiens zinc finger, RAN-binding domain containing 3 (ZRANB3), mRNA [NM_032143]	-0.230904	-0.327108	-0.827614
RPAP3	NM_024604	ref|Homo sapiens RNA polymerase II associated protein 3 (RPAP3), transcript variant 1, mRNA [NM_024604]	0.24828	0.394774	0.610741
ZNF709	NM_152601	ref|Homo sapiens zinc finger protein 709 (ZNF709), mRNA [NM_152601]	0.0123504	0.42089	0.743409
RHOT1	NM_001033568	ref|Homo sapiens ras homolog gene family, member T1 (RHOT1), transcript variant 1, mRNA [NM_001033568]	0.100657	-0.226874	-0.114321
RAD54L2	NM_015106	ref|Homo sapiens RAD54-like 2 (S. cerevisiae) (RAD54L2), mRNA [NM_015106]	-0.0598064	-0.0256549	-0.399652
RAB3IL1	NM_013401	ref|Homo sapiens RAB3A interacting protein (rabin3)-like 1 (RAB3IL1), mRNA [NM_013401]	0.150621	0.625246	0.708888
HNRNPA1L2	NM_001011724	ref|Homo sapiens heterogeneous nuclear ribonucleoprotein A1-like 2 (HNRNPA1L2), transcript variant 1, mRNA [NM_001011724]	-0.167262	-0.153158	-0.611607
HIAT1	NM_033055	ref|Homo sapiens hippocampus abundant transcript 1 (HIAT1), mRNA [NM_033055]	0.370684	0.450268	0.61057
C20orf111	NM_016470	ref|Homo sapiens chromosome 20 open reading frame 111 (C20orf111), mRNA [NM_016470]	0.0840979	0.388875	0.663014
LOC255177	BC031230	gb|Homo sapiens cDNA clone IMAGE:5295221. [BC031230]	-0.340299	-0.196045	-0.387084
WDR66	NM_144668	ref|Homo sapiens WD repeat domain 66 (WDR66), transcript variant 1, mRNA [NM_144668]	-0.072945	-0.00647619	0.569506
MSH3	NM_002439	ref|Homo sapiens mutS homolog 3 (E. coli) (MSH3), mRNA [NM_002439]	-0.181216	-0.582834	-0.587963
MYO1B	NM_012223	ref|Homo sapiens myosin IB (MYO1B), transcript variant 2, mRNA [NM_012223]	-0.282665	-0.529195	-0.738801
MUC17	NM_001040105	ref|Homo sapiens mucin 17, cell surface associated (MUC17), mRNA [NM_001040105]	0.169813	0.539878	0.813621
PRKCD	NM_006254	ref|Homo sapiens protein kinase C, delta (PRKCD), transcript variant 1, mRNA [NM_006254]	0.171741	0.138026	0.36036
ZNF320	NM_207333	ref|Homo sapiens zinc finger protein 320 (ZNF320), mRNA [NM_207333]	0.259343	0.390274	0.871693
SLC10A3	NM_019848	ref|Homo sapiens solute carrier family 10 (sodium/bile acid cotransporter family), member 3 (SLC10A3), transcript variant 1, mRNA [NM_019848]	0.172349	0.716836	0.945797
CDK9	NM_001261	ref|Homo sapiens cyclin-dependent kinase 9 (CDK9), mRNA [NM_001261]	0.0722912	0.185131	0.688619
RAB34	NM_001142625	ref|Homo sapiens RAB34, member RAS oncogene family (RAB34), transcript variant 3, mRNA [NM_001142625]	1.1237	0.202607	2.01526
PNPT1	NM_033109	ref|Homo sapiens polyribonucleotide nucleotidyltransferase 1 (PNPT1), mRNA [NM_033109]	-0.020925	-0.233485	-0.504443
BCR	NM_004327	ref|Homo sapiens breakpoint cluster region (BCR), transcript variant 1, mRNA [NM_004327]	-0.0774666	-0.875084	-0.567028
MAPKSP1	NM_021970	ref|Homo sapiens MAPK scaffold protein 1 (MAPKSP1), transcript variant 1, mRNA [NM_021970]	0.214305	-0.218595	-0.03134
C7orf59	NM_001008395	ref|Homo sapiens chromosome 7 open reading frame 59 (C7orf59), mRNA [NM_001008395]	-0.022551	0.370012	0.743605
PMS2	NM_000535	ref|Homo sapiens PMS2 postmeiotic segregation increased 2 (S. cerevisiae) (PMS2), transcript variant 1, mRNA [NM_000535]	-0.161499	0.394285	0.547324
BCAR1	AK127004	gb|Homo sapiens cDNA FLJ45059 fis, clone BRAWH3023274. [AK127004]	-0.442747	0.256901	0.0322584
NCAPH2	NM_014551	ref|Homo sapiens non-SMC condensin II complex, subunit H2 (NCAPH2), transcript variant 1, mRNA [NM_014551]	0.532822	0.238136	0.824973
DEGS1	NM_003676	ref|Homo sapiens degenerative spermatocyte homolog 1, lipid desaturase (Drosophila) (DEGS1), mRNA [NM_003676]	0.38703	0.766782	0.741264
KCNMB3	NM_171828	ref|Homo sapiens potassium large conductance calcium-activated channel, subfamily M beta member 3 (KCNMB3), transcript variant 1, mRNA [NM_171828]	0.363343	0.719289	1.22988
NAIP	NM_004536	ref|Homo sapiens NLR family, apoptosis inhibitory protein (NAIP), transcript variant 1, mRNA [NM_004536]	-0.425514	-0.150739	-0.47953
EXOC1	NM_001024924	ref|Homo sapiens exocyst complex component 1 (EXOC1), transcript variant 3, mRNA [NM_001024924]	0.335028	0.506569	0.694372
CHIC2	NM_012110	ref|Homo sapiens cysteine-rich hydrophobic domain 2 (CHIC2), mRNA [NM_012110]	0.305041	0.32132	0.514324
SPSB2	NM_032641	ref|Homo sapiens splA/ryanodine receptor domain and SOCS box containing 2 (SPSB2), transcript variant 1, mRNA [NM_032641]	-0.131736	-0.333878	-0.454118
ANAPC7	NM_016238	ref|Homo sapiens anaphase promoting complex subunit 7 (ANAPC7), transcript variant 1, mRNA [NM_016238]	-0.266294	-0.0957479	-0.461655
INCENP	NM_001040694	ref|Homo sapiens inner centromere protein antigens 135/155kDa (INCENP), transcript variant 1, mRNA [NM_001040694]	0.216329	0.625479	0.786514
ZNF197	NM_001024855	ref|Homo sapiens zinc finger protein 197 (ZNF197), transcript variant 2, mRNA [NM_001024855]	0.204946	0.0400895	0.314665
ZNF529	NM_020951	ref|Homo sapiens zinc finger protein 529 (ZNF529), transcript variant 2, mRNA [NM_020951]	0.205141	0.852682	0.75934
RALGAPA2	NM_020343	ref|Homo sapiens Ral GTPase activating protein, alpha subunit 2 (catalytic) (RALGAPA2), mRNA [NM_020343]	-0.415967	-0.349527	-0.79427
HNRNPA1L2	NM_001011724	ref|Homo sapiens heterogeneous nuclear ribonucleoprotein A1-like 2 (HNRNPA1L2), transcript variant 1, mRNA [NM_001011724]	-0.187444	-0.248181	-0.667658
KATNA1	NM_007044	ref|Homo sapiens katanin p60 (ATPase-containing) subunit A 1 (KATNA1), mRNA [NM_007044]	0.157596	0.0988616	0.561569
DPP3	NM_130443	ref|Homo sapiens dipeptidyl-peptidase 3 (DPP3), transcript variant 2, mRNA [NM_130443]	-0.146183	-0.242652	-0.499036
[truncated: 549 more rows]
